# Supplementary material for: Colonisation of extended spectrum β-lactamase- and carbapenemase-producing bacteria on hospital surfaces from low-/middle-income countries
Source: Research Square preprint supplement (doi:10.21203/rs.3.rs-3209071/v1), 2023-08-04
Supplement: Supplementary file 1 [file 93a0713292d5dc39ac8609d0.pdf]

**Table S9.** Hospital surface swabs (HSS) collection dates classified into seven time bands, to study the antimicrobial resistance genes (ARGs) prevalence during the study timeline (November 2015 – January 2018).

a) Dry and wet seasons per country (some of them showing information on temperatures) based on the Climate change knowledge portal (World Bank Group). Differences between certain parts of a country exist, thus, the seasons are described for most part of a country. Moreover, dry and wet seasons occur during opposite months, or more than one dry/wet season exist for some countries, and the duration of a season is different in each country. This table was only taken into consideration to establish seven time bands according to the months included per season, but no seasonal analysis per country was performed because of all the mentioned differences between countries. b) Timeline classification into seven time bands and number of HSS collected per country during the study timeline. Information regarding collection dates was available for a total of 4,662 HSS, which were considered for the analysis of ARG prevalence during timeline.

a)

| Country                                                                       | Dry season                                     | Wet season                                                                                                                            |
|-------------------------------------------------------------------------------|------------------------------------------------|---------------------------------------------------------------------------------------------------------------------------------------|
| Bangladesh                                                                    | December-February<br>(cold temperatures)       | April-September or October<br>(warm temperatures)                                                                                     |
| Ethiopia                                                                      | October-December<br>(cold temperatures)        | June-September / February-May: less<br>rainfall                                                                                       |
| Nigeria                                                                       | November-March<br>(March is the hottest month) | April-October / March-October<br>/ March-November<br>(August is the coldest month and June<br>is the wettest)                         |
| Pakistan                                                                      | December-May<br>(cold and hot temperatures)    | June-November                                                                                                                         |
| Rwanda                                                                        | June-august / December-<br>February            | March-May / September-November                                                                                                        |
| South Africa (majority of<br>the country but<br>differences for Cape<br>Town) | June-August                                    | December-February / November-<br>March: highest rainfall<br>(warm temperatures)<br><br>Cape Town: May-August rainy season<br>(winter) |

b)

| Time band      | Number of HSS<br>included per<br>month | Number of HSS<br>included per<br>banding | Number of<br>HSS in<br>Bangladesh | Number of<br>HSS in<br>Ethiopia | Number of<br>HSS in<br>Nigeria | Number of<br>HSS in<br>Pakistan | Number of<br>HSS in<br>Rwanda | Number of<br>HSS in South<br>Africa |
|----------------|----------------------------------------|------------------------------------------|-----------------------------------|---------------------------------|--------------------------------|---------------------------------|-------------------------------|-------------------------------------|
| November 2015  | 37                                     | 309                                      | 2                                 | 0                               | 35                             | 0                               | 0                             | 0                                   |
| December 2015  | 72                                     |                                          | 27                                | 0                               | 45                             | 0                               | 0                             | 0                                   |
| January 2016   | 109                                    |                                          | 32                                | 0                               | 45                             | 10                              | 22                            | 0                                   |
| February 2016  | 91                                     |                                          | 26                                | 0                               | 45                             | 20                              | 0                             | 0                                   |
| March 2016     | 115                                    | 693                                      | 37                                | 0                               | 45                             | 33                              | 0                             | 0                                   |
| April 2016     | 146                                    |                                          | 29                                | 0                               | 55                             | 40                              | 22                            | 0                                   |
| May 2016       | 232                                    |                                          | 32                                | 0                               | 70                             | 59                              | 46                            | 25                                  |
| June 2016      | 200                                    |                                          | 15                                | 0                               | 45                             | 64                              | 23                            | 53                                  |
| July 2016      | 276                                    | 819                                      | 47                                | 0                               | 45                             | 60                              | 46                            | 77                                  |
| August 2016    | 198                                    |                                          | 64                                | 0                               | 61                             | 55                              | 0                             | 20                                  |
| September 2016 | 171                                    |                                          | 41                                | 0                               | 44                             | 59                              | 23                            | 3                                   |
| October 2016   | 174                                    |                                          | 39                                | 0                               | 20                             | 55                              | 23                            | 36                                  |
| November 2016  | 191                                    | 1014                                     | 50                                | 0                               | 35                             | 56                              | 45                            | 5                                   |
| December 2016  | 226                                    |                                          | 34                                | 0                               | 29                             | 46                              | 66                            | 51                                  |
| January 2017   | 254                                    |                                          | 30                                | 0                               | 21                             | 55                              | 23                            | 125                                 |
| February 2017  | 343                                    |                                          | 42                                | 0                               | 25                             | 40                              | 23                            | 213                                 |
| March 2017     | 186                                    | 688                                      | 32                                | 0                               | 25                             | 61                              | 68                            | 0                                   |
| April 2017     | 142                                    |                                          | 45                                | 0                               | 55                             | 20                              | 22                            | 0                                   |
| May 2017       | 156                                    |                                          | 62                                | 0                               | 43                             | 5                               | 46                            | 0                                   |
| June 2017      | 204                                    |                                          | 64                                | 0                               | 57                             | 15                              | 68                            | 0                                   |
| July 2017      | 300                                    | 892                                      | 47                                | 0                               | 186                            | 0                               | 68                            | 0                                   |
| August 2017    | 143                                    |                                          | 31                                | 42                              | 35                             | 13                              | 22                            | 0                                   |
| September 2017 | 229                                    |                                          | 48                                | 35                              | 72                             | 5                               | 69                            | 0                                   |
| October 2017   | 220                                    |                                          | 60                                | 55                              | 34                             | 15                              | 56                            | 0                                   |
| November 2017  | 169                                    | 247                                      | 41                                | 45                              | 25                             | 5                               | 53                            | 0                                   |
| December 2017  | 68                                     |                                          | 2                                 | 61                              | 0                              | 5                               | 0                             | 0                                   |
| January 2018   | 10                                     |                                          | 0                                 | 10                              | 0                              | 0                               | 0                             | 0                                   |
| TOTAL          |                                        | 4,662                                    | 979                               | 248                             | 1197                           | 796                             | 834                           | 608                                 |

4,662
