# Supplementary material for: Colonisation of extended spectrum β-lactamase- and carbapenemase-producing bacteria on hospital surfaces from low-/middle-income countries
Source: Research Square preprint supplement (doi:10.21203/rs.3.rs-3209071/v1), 2023-08-04
Supplement: Supplementary file 1 [file 1955670a341ad73df40de841.xlsx]

## Sheet: Sheet1
	Supplementary material. Colonisation of extended spectrum β-lactamase- and carbapenemase-producing bacteria on hospital surfaces from low-/middle-income countries
	Table S11. List of genomes, submitted to NCBI (BioProject number PRJNA971772). Biosample accession and genome accession numbers, isolate codes, bacterial species and sequence type (ST) are listed in this table.
	Biosample Accession	Isolate code	Species ID (WGS)	ST	Genome Accession
	SAMN35054387	BC-E303.1	E. hormaechei	511	JASGRY000000000
	SAMN35054480	BC-E317.1	P. asiatica	novel	Processing
	SAMN35054388	BC-E317.2	E. hormaechei	511	JASGRX000000000
	SAMN35054483	BC-E71.1	S. marcescens	ND	JASGRW000000000
	SAMN35054481	BC-E258.1	P. mendocina	ND	JASGRV000000000
	SAMN35054383	BC-E28.1	E. cloacae	977	JASGRU000000000
	SAMN35054389	BC-E389.1	E. hormaechei	544	JASGRT000000000
	SAMN35054390	BC-E431.1	E. hormaechei	511	JASGRS000000000
	SAMN35054484	BC-E65.1	S. marcescens	ND	JASGRR000000000
	SAMN35054485	BK-E792.1	S. marcescens	ND	JASGRQ000000000
	SAMN35054391	BK-E811.1	E. hormaechei	418	JASGRP000000000
	SAMN35054392	BK-E825.2	E. hormaechei	418	JASGRO000000000
	SAMN35054495	BK-E578.1	S. maltophilia	novel	JASGRN000000000
	SAMN35054486	BK-E702.1	S. marcescens	ND	JASGRM000000000
	SAMN35054487	BK-E759.1	S. marcescens	ND	JASGRL000000000
	SAMN35054494	BK-E778.1	S. acidaminiphila	ND	Processing
	SAMN35054393	BK-E778.2	E. hormaechei	418	JASGRK000000000
	SAMN35054394	BK-E819.1	E. hormaechei	418	JASGRJ000000000
	SAMN35054395	BK-E821.1	E. hormaechei	418	JASGRI000000000
	SAMN35054396	BK-E824.1	E. hormaechei	418	JASGRH000000000
	SAMN35054488	BK-E825.1	S. marcescens	ND	JASGRG000000000
	SAMN35054489	BK-E836.1	S. marcescens	ND	JASGRF000000000
	SAMN35054397	BK-E837.2	E. hormaechei	418	JASGRE000000000
	SAMN35054490	ESI-E0001.1	S. marcescens	ND	JASGRD000000000
	SAMN35054378	BC-E347.1	A. nosocomialis	68	JASGRC000000000
	SAMN35054471	PP-E1017.1	L. adecarboxylata	ND	JASGRB000000000
	SAMN35054431	PP-E285.1	K. pneumoniae	29	JASGRA000000000
	SAMN35054432	PP-E334.1	K. pneumoniae	29	JASGQZ000000000
	SAMN35054433	PP-E535.1	K. pneumoniae	20	JASGQY000000000
	SAMN35054434	PP-E567.1	K. pneumoniae	611	JASPKX000000000
	SAMN35054435	PP-E756.1	K. pneumoniae	1317	JASGQX000000000
	SAMN35054398	NK-E166.1	E. hormaechei	696	JASGQW000000000
	SAMN35054399	NK-E171.1	E. hormaechei	947	JASGQV000000000
	SAMN35054400	NK-E179.1	E. hormaechei	114	JASGQU000000000
	SAMN35054369	NK-E197.1	A. baumannii	1093	JASGQT000000000
	SAMN35054370	NK-E84.2	A. baumannii	1	JASGQS000000000
	SAMN35054469	NN-E164.1	K. quasipneumoniae	1887	JASGQR000000000
	SAMN35054371	NN-E179.1	A. baumannii	ND	JASGQQ000000000
	SAMN35054436	NN-E269.1	K. pneumoniae	14	JASGQP000000000
	SAMN35054384	NN-E423.1	E. cloacae	1107	JASGQO000000000
	SAMN35054385	NN-E499.1	E. cloacae	1107	JASGQN000000000
	SAMN35054401	NW-E48.1	E. hormaechei	231	JASGQM000000000
	SAMN35054402	PP-E1001.1	E. hormaechei	1372	JASGQL000000000
	SAMN35054472	PP-E1014.1	L. adecarboxylata	ND	JASGQK000000000
	SAMN35054425	PP-E1018.2	E. roggenkampii	523	JASGQJ000000000
	SAMN35054473	PP-E1029.1	L. adecarboxylata	ND	JASGQI000000000
	SAMN35054437	PP-E1465.1	K. pneumoniae	15	JASGQH000000000
	SAMN35054438	PP-E165.1	K. pneumoniae	15	JASGQG000000000
	SAMN35054439	PP-E165.2	K. pneumoniae	11	JASGQF000000000
	SAMN35054440	PP-E283.1	K. pneumoniae	15	JASGQE000000000
	SAMN35054441	PP-E332.1	K. pneumoniae	15	JASGQD000000000
	SAMN35054442	PP-E341.1	K. pneumoniae	15	JASGQC000000000
	SAMN35054403	PP-E379.1	E. hormaechei	231	JASGQB000000000
	SAMN35054443	PP-E444.1	K. pneumoniae	15	JASGQA000000000
	SAMN35054404	PP-E484.1	E. hormaechei	270	JASGPZ000000000
	SAMN35054379	PP-E639.1	E. coli	448	JASGPY000000000
	SAMN35054444	PP-E660.2	K. pneumoniae	novel	JASGPX000000000
	SAMN35054405	PP-E698.1	E. hormaechei	968	JASGPW000000000
	SAMN35054445	PP-E723.1	K. pneumoniae	15	JASGPV000000000
	SAMN35054406	PP-E737.1	E. hormaechei	120	JASGPU000000000
	SAMN35054446	PP-E747.2	K. pneumoniae	1317	JASGPT000000000
	SAMN35054447	PP-E785.1	K. pneumoniae	20	JASGPS000000000
	SAMN35054407	PP-E829.1	E. hormaechei	novel	JASGPR000000000
	SAMN35054448	PP-E864.1	K. pneumoniae	20	JASGPQ000000000
	SAMN35054408	PP-E911.1	E. hormaechei	316	JASGPP000000000
	SAMN35054474	PP-E929.1	L. adecarboxylata	ND	JASGPO000000000
	SAMN35054449	PP-E938.1	K. pneumoniae	15	JASGPN000000000
	SAMN35054409	PP-E991.3	E. hormaechei	316	JASGPM000000000
	SAMN35054475	PP-E1013.2	L. adecarboxylata	ND	JASGPL000000000
	SAMN35054410	PP-E1015.2	E. hormaechei	316	JASGPK000000000
	SAMN35054411	PP-E1018.1	E. hormaechei	316	JASGPJ000000000
	SAMN35054476	PP-E1019.2	L. adecarboxylata	ND	JASGPI000000000
	SAMN35054412	PP-E1022.1	E. hormaechei	316	JASGPH000000000
	SAMN35054450	PP-E1023.1	K. pneumoniae	147	JASGPG000000000
	SAMN35054451	PP-E1031.1	K. pneumoniae	15	JASGPF000000000
	SAMN35054477	PP-E1103.1	L. adecarboxylata	ND	JASGPE000000000
	SAMN35054452	PP-E1219.3	K. pneumoniae	15	JASGPD000000000
	SAMN35054453	PP-E1439.1	K. pneumoniae	15	JASGPC000000000
	SAMN35054454	PP-E259.2	K. pneumoniae	11	JASGPB000000000
	SAMN35054455	PP-E271.1	K. pneumoniae	15	JASGPA000000000
	SAMN35054456	PP-E286.1	K. pneumoniae	29	JASGOZ000000000
	SAMN35054457	PP-E290.1	K. pneumoniae	29	JASGOY000000000
	SAMN35054458	PP-E319.1	K. pneumoniae	15	JASGOX000000000
	SAMN35054413	PP-E346.1	E. hormaechei	231	JASGOW000000000
	SAMN35054414	PP-E370.2	E. hormaechei	1372	JASGOV000000000
	SAMN35054415	PP-E370.1	E. hormaechei	120	JASGOU000000000
	SAMN35054416	PP-E375.1	E. hormaechei	354	JASGOT000000000
	SAMN35054459	PP-E379.2	K. pneumoniae	20	JASGOS000000000
	SAMN35054417	PP-E473.1	E. hormaechei	120	JASGOR000000000
	SAMN35054492	PP-E493.1	S. xiamenensis	ND	JASGOQ000000000
	SAMN35054418	PP-E509.1	E. hormaechei	231	JASGOP000000000
	SAMN35054460	PP-E509.2	K. pneumoniae	70	JASGOO000000000
	SAMN35054491	PP-E527.1	S. marcescens	ND	JASGON000000000
	SAMN35054470	PP-E580.1	K. quasipneumoniae	4756	JASGOM000000000
	SAMN35054419	PP-E651.2	E. hormaechei	127	JASGOL000000000
	SAMN35054461	PP-E659.1	K. pneumoniae	1317	JASGOK000000000
	SAMN35054428	PP-E660.1	K. michiganensis	354	JASGOJ000000000
	SAMN35054462	PP-E68.2	K. pneumoniae	15	JASGOI000000000
	SAMN35054482	PP-E68.1	P. putida	146	JASGOH000000000
	SAMN35054496	PP-E699.1	Unidentified	ND	JASGOG000000000
	SAMN35054386	PP-E700.1	E. cloacae	84	JASGOF000000000
	SAMN35054429	PP-E700.2	K. michiganensis	354	JASGOE000000000
	SAMN35054430	PP-E732.3	K. michiganensis	354	JASGOD000000000
	SAMN35054463	PP-E748.1	K. pneumoniae	1317	JASGOC000000000
	SAMN35054426	PP-E764.1	E. roggenkampii	523	JASGOB000000000
	SAMN35054380	PP-E819.1	E. coli	405	JASGOA000000000
	SAMN35054464	PP-E819.3	K. pneumoniae	15	JASGNZ000000000
	SAMN35054420	PP-E860.1	E. hormaechei	696	JASGNY000000000
	SAMN35054465	PP-E870.1	K. pneumoniae	20	JASGNX000000000
	SAMN35054466	PP-E901.1	K. pneumoniae	15	JASGNW000000000
	SAMN35054467	PP-E907.1	K. pneumoniae	20	JASGNV000000000
	SAMN35054427	PP-E920.2	E. roggenkampii	523	JASGNU000000000
	SAMN35054478	PP-E937.2	L. adecarboxylata	ND	JASGNT000000000
	SAMN35054479	PP-E991.1	L. adecarboxylata	ND	JASGNS000000000
	SAMN35054421	RK-E110.2	E. hormaechei	120	JASGNR000000000
	SAMN35054493	RK-E270.1	S. xiamenensis	ND	JASGNQ000000000
	SAMN35054422	RK-E270.2	E. hormaechei	1372	JASGNP000000000
	SAMN35054372	RU-E125.1	A. baumannii	52	JASPKW000000000
	SAMN35054373	RU-E131.1	A. baumannii	52	JASPKV000000000
	SAMN35054374	RU-E233.1	A. baumannii	78	JASGNO000000000
	SAMN35054381	RU-E319.3	E. asburiae	733	JASGNN000000000
	SAMN35054375	RU-E319.1	A. baumannii	52	JASPKU000000000
	SAMN35054382	RU-E328.1	E. asburiae	733	JASGNM000000000
	SAMN35054468	RU-E344.2	K. pneumoniae	22	JASGNL000000000
	SAMN35054376	RU-E355.1	A. baumannii	946	JASGNK000000000
	SAMN35054423	RU-E68.3	E. hormaechei	231	JASPKT000000000
	SAMN35054424	ZAT-E765.4	E. hormaechei	93	JASGNJ000000000
	SAMN35054377	ZAT-E765.1	A. baumannii	52	JASGNI000000000
