# Supplementary material for: Colonisation of extended spectrum β-lactamase- and carbapenemase-producing bacteria on hospital surfaces from low-/middle-income countries
Source: Research Square preprint supplement (doi:10.21203/rs.3.rs-3209071/v1), 2023-08-04
Supplement: Supplementary file 2 [file 247b9cf69be63fa14e43b362.xlsx]

## Sheet: species ID MALDI-TOF MS and WGS
Supplementary material. Colonisation of extended spectrum β-lactamase- and carbapenemase-producing bacteria on hospital surfaces from low-/middle-income countries
Table S4. Number of isolates per hospital site carrying blaNDM and blaOXA-48-like according to PCR screening and bacterial species identification by MALDI-TOF MS. A total of 175 bacterial isolates from 27 bacterial species identified by MALDI-TOF MS (and 3 “unidentified” isolates) were recovered. BARNARDS hospitals: Bangladesh, Chittagong Maa-O-Shishu Hospital, Chattogram (BC), and Kumudini Women…
a)		Number of isolates per hospital site carrying blaNDM and blaOXA-48-like according to PCR screening										Total isolates among collection (175)
	Species identified by MALDI-TOF	BC	BK	ES	NK	NN	NW	PP	RK	RU	ZAT
	Achromobacter insolitus	0(0%)	1(0.6%)	0(0%)	0(0%)	0(0%)	0(0%)	0(0%)	0(0%)	0(0%)	0(0%)	1	0.006
	Achromobacter spanius	1(0.6%)	0(0%)	0(0%)	0(0%)	0(0%)	0(0%)	0(0%)	0(0%)	0(0%)	0(0%)	1	0.006
	Acinetobacter baumannii	0(0%)	0(0%)	0(0%)	3(1.7%)	1(0.6%)	0(0%)	0(0%)	0(0%)	8(4.6%)	1(0.6%)	13	0.074
	Acinetobacter bereziniae	0(0%)	0(0%)	0(0%)	0(0%)	0(0%)	0(0%)	0(0%)	1(0.6%)	0(0%)	0(0%)	1	0.006
	Acinetobacter nosocomialis	1(0.6%)	0(0%)	0(0%)	0(0%)	0(0%)	0(0%)	0(0%)	0(0%)	0(0%)	0(0%)	1	0.006
	Enterobacter asburiae	0(0%)	0(0%)	0(0%)	0(0%)	0(0%)	0(0%)	0(0%)	0(0%)	2(1.1%)	0(0%)	2	0.011
	Enterobacter cloacae	1(0.6%)	0(0%)	0(0%)	0(0%)	3(1.7%)	0(0%)	4(2.3%)	0(0%)	0(0%)	0(0%)	8	0.046
	Enterobacter hormaechei	4(2.3%)	7(4%)	0(0%)	3(1.7%)	0(0%)	1(0.6%)	19(10.9%)	2(1.1%)	1(0.6%)	1(0.6%)	38	0.217
	Enterobacter ludwigii	0(0%)	2(1.1%)	0(0%)	0(0%)	0(0%)	0(0%)	0(0%)	0(0%)	0(0%)	0(0%)	2	0.011
	Enterobacter roggenkampii	0(0%)	0(0%)	0(0%)	0(0%)	0(0%)	0(0%)	3(1.7%)	0(0%)	0(0%)	0(0%)	3	0.017
	Escherichia coli	0(0%)	0(0%)	0(0%)	0(0%)	0(0%)	0(0%)	2(1.1%)	0(0%)	1(0.6%)	0(0%)	3	0.017
	Klebsiella michiganensis	0(0%)	1(0.6%)	0(0%)	0(0%)	0(0%)	0(0%)	3(1.7%)	0(0%)	0(0%)	0(0%)	4	0.023
	Klebsiella oxytoca	0(0%)	0(0%)	0(0%)	0(0%)	1(0.6%)	0(0%)	0(0%)	0(0%)	0(0%)	0(0%)	1	0.006
	Klebsiella pneumoniae	0(0%)	0(0%)	0(0%)	1(0.6%)	1(0.6%)	0(0%)	42(24%)	0(0%)	2(1.1%)	0(0%)	46	0.263
	Klebsiella quasipneumoniae	0(0%)	0(0%)	0(0%)	0(0%)	1(0.6%)	0(0%)	1(0.6%)	0(0%)	0(0%)	0(0%)	2	0.011
	Kosakonia cowanii	0(0%)	0(0%)	0(0%)	0(0%)	0(0%)	0(0%)	1(0.6%)	0(0%)	0(0%)	0(0%)	1	0.006
	Leclercia adecarboxylata	0(0%)	0(0%)	0(0%)	0(0%)	1(0.6%)	0(0%)	10(5.7%)	0(0%)	0(0%)	0(0%)	11	0.063
	Pseudomonas aeruginosa	4(2.3%)	1(0.6%)	0(0%)	0(0%)	0(0%)	0(0%)	1(0.6%)	0(0%)	0(0%)	0(0%)	6	0.034
	Pseudomonas asiatica	1(0.6%)	0(0%)	0(0%)	0(0%)	0(0%)	0(0%)	0(0%)	0(0%)	0(0%)	0(0%)	1	0.006
	Pseudomonas mendocina	1(0.6%)	2(1.1%)	0(0%)	0(0%)	0(0%)	0(0%)	0(0%)	0(0%)	0(0%)	0(0%)	3	0.017
	Pseudomonas putida	0(0%)	1(0.6%)	0(0%)	0(0%)	0(0%)	0(0%)	1(0.6%)	0(0%)	0(0%)	0(0%)	2	0.011
	Pseudomonas stutzeri	0(0%)	0(0%)	0(0%)	0(0%)	0(0%)	0(0%)	2(1.1%)	0(0%)	0(0%)	0(0%)	2	0.011
	Serratia marcescens	2(1.1%)	6(3.4%)	1(0.6%)	0(0%)	1(0.6%)	0(0%)	2(1.1%)	0(0%)	0(0%)	0(0%)	12	0.069
	Shewanella putrefaciens	0(0%)	1(0.6%)	0(0%)	0(0%)	0(0%)	0(0%)	0(0%)	0(0%)	0(0%)	1(0.6%)	2	0.011
	Shewanella xiamenensis	0(0%)	0(0%)	0(0%)	0(0%)	0(0%)	0(0%)	1(0.6%)	1(0.6%)	0(0%)	0(0%)	2	0.011
	Stenotrophomonas acidaminiphila	0(0%)	1(0.6%)	0(0%)	0(0%)	0(0%)	0(0%)	0(0%)	0(0%)	0(0%)	0(0%)	1	0.006
	Stenotrophomonas maltophilia	1(0.6%)	2(1.1%)	0(0%)	0(0%)	0(0%)	0(0%)	0(0%)	0(0%)	0(0%)	0(0%)	3	0.017
	Unidentified	1(0.6%)	0(0%)	0(0%)	1(0.6%)	0(0%)	0(0%)	1(0.6%)	0(0%)	0(0%)	0(0%)	3	0.017
	Total isolates per hospital site	17	25	1	8	9	1	93	4	14	3	175	1
b)	Bacterial species	n (%) out of the total isolates (175)		n (%) A. baumannii out of all the Acinetobacter spp.		n (%) E. hormaechei out of all the Enterobacter spp.		n (%) K. pneumoniae out of all the Klebsiella spp.
	Acinetobacter spp.	15	0.086	13/15 (86.7%)
	Enterobacter spp.	53	0.303			38/53 (71.7%)
	Klebsiella spp.	53	0.303					46/53 (86.8%)
	L. adecarboxylata	11	0.063
	S. marcescens	12	0.069
	Pseudomonas spp.	14	0.08
c)		blaNDM positive isolates out of total isolates in each hospital site according to PCR screening										Total blaNDM positive out of 175 total isolates (n and %)
	Species identified by MALDI-TOF	BC	BK	ES	NK	NN	NW	PP	RK	RU	ZAT
	Achromobacter insolitus	0(0%)	1(4%)	0(0%)	0(0%)	0(0%)	0(0%)	0(0%)	0(0%)	0(0%)	0(0%)	1	0.006
	Achromobacter spanius	1(5.9%)	0(0%)	0(0%)	0(0%)	0(0%)	0(0%)	0(0%)	0(0%)	0(0%)	0(0%)	1	0.006
	Acinetobacter baumannii	0(0%)	0(0%)	0(0%)	3(37.5%)	1(11.1%)	0(0%)	0(0%)	0(0%)	7(50%)	1(33.3%)	12	0.069
	Acinetobacter bereziniae	0(0%)	0(0%)	0(0%)	0(0%)	0(0%)	0(0%)	0(0%)	0(0%)	0(0%)	0(0%)	0	0
	Acinetobacter nosocomialis	1(5.9%)	0(0%)	0(0%)	0(0%)	0(0%)	0(0%)	0(0%)	0(0%)	0(0%)	0(0%)	1	0.006
	Enterobacter asburiae	0(0%)	0(0%)	0(0%)	0(0%)	0(0%)	0(0%)	0(0%)	0(0%)	1(7.1%)	0(0%)	1	0.006
	Enterobacter cloacae	1(5.9%)	0(0%)	0(0%)	0(0%)	2(22.2%)	0(0%)	4(4.3%)	0(0%)	0(0%)	0(0%)	7	0.04
	Enterobacter hormaechei	4(23.5%)	6(24%)	0(0%)	3(37.5%)	0(0%)	1(100%)	19(20.4%)	2(50%)	1(7.1%)	1(33.3%)	37	0.211
	Enterobacter ludwigii	0(0%)	2(8%)	0(0%)	0(0%)	0(0%)	0(0%)	0(0%)	0(0%)	0(0%)	0(0%)	2	0.011
	Enterobacter roggenkampii	0(0%)	0(0%)	0(0%)	0(0%)	0(0%)	0(0%)	3(3.2%)	0(0%)	0(0%)	0(0%)	3	0.017
	Escherichia coli	0(0%)	0(0%)	0(0%)	0(0%)	0(0%)	0(0%)	2(2.2%)	0(0%)	1(7.1%)	0(0%)	3	0.017
	Klebsiella michiganensis	0(0%)	1(4%)	0(0%)	0(0%)	0(0%)	0(0%)	3(3.2%)	0(0%)	0(0%)	0(0%)	4	0.023
	Klebsiella oxytoca	0(0%)	0(0%)	0(0%)	0(0%)	1(11.1%)	0(0%)	0(0%)	0(0%)	0(0%)	0(0%)	1	0.006
	Klebsiella pneumoniae	0(0%)	0(0%)	0(0%)	1(12.5%)	1(11.1%)	0(0%)	41(44.1%)	0(0%)	2(14.3%)	0(0%)	45	0.257
	Klebsiella quasipneumoniae	0(0%)	0(0%)	0(0%)	0(0%)	1(11.1%)	0(0%)	1(1.1%)	0(0%)	0(0%)	0(0%)	2	0.011
	Kosakonia cowanii	0(0%)	0(0%)	0(0%)	0(0%)	0(0%)	0(0%)	1(1.1%)	0(0%)	0(0%)	0(0%)	1	0.006
	Leclercia adecarboxylata	0(0%)	0(0%)	0(0%)	0(0%)	0(0%)	0(0%)	9(9.7%)	0(0%)	0(0%)	0(0%)	9	0.051
	Pseudomonas aeruginosa	4(23.5%)	1(4%)	0(0%)	0(0%)	0(0%)	0(0%)	1(1.1%)	0(0%)	0(0%)	0(0%)	6	0.034
	Pseudomonas asiatica	1(5.9%)	0(0%)	0(0%)	0(0%)	0(0%)	0(0%)	0(0%)	0(0%)	0(0%)	0(0%)	1	0.006
	Pseudomonas mendocina	1(5.9%)	1(4%)	0(0%)	0(0%)	0(0%)	0(0%)	0(0%)	0(0%)	0(0%)	0(0%)	2	0.011
	Pseudomonas putida	0(0%)	0(0%)	0(0%)	0(0%)	0(0%)	0(0%)	1(1.1%)	0(0%)	0(0%)	0(0%)	1	0.006
	Pseudomonas stutzeri	0(0%)	0(0%)	0(0%)	0(0%)	0(0%)	0(0%)	2(2.2%)	0(0%)	0(0%)	0(0%)	2	0.011
	Serratia marcescens	2(11.8%)	6(24%)	1(100%)	0(0%)	1(11.1%)	0(0%)	2(2.2%)	0(0%)	0(0%)	0(0%)	12	0.069
	Shewanella putrefaciens	0(0%)	0(0%)	0(0%)	0(0%)	0(0%)	0(0%)	0(0%)	0(0%)	0(0%)	0(0%)	0	0
	Shewanella xiamenensis	0(0%)	0(0%)	0(0%)	0(0%)	0(0%)	0(0%)	1(1.1%)	0(0%)	0(0%)	0(0%)	1	0.006
	Stenotrophomonas acidaminiphila	0(0%)	1(4%)	0(0%)	0(0%)	0(0%)	0(0%)	0(0%)	0(0%)	0(0%)	0(0%)	1	0.006
	Stenotrophomonas maltophilia	1(5.9%)	2(8%)	0(0%)	0(0%)	0(0%)	0(0%)	0(0%)	0(0%)	0(0%)	0(0%)	3	0.017
	Unidentified	1(5.9%)	0(0%)	0(0%)	1(12.5%)	0(0%)	0(0%)	1(1.1%)	0(0%)	0(0%)	0(0%)	3	0.017
	Total blaNDM positive isolates per hospital	17	21	1	8	7	1	91	2	12	2	Total blaNDM positive isolates	162
d)		blaOXA-48-like positive isolates out of total isolates in each hospital site according to PCR screening										Total blaOXA-48-like positive out of 175 total isolates (n and %)
	Species identified by MALDI-TOF	BC	BK	ES	NK	NN	NW	PP	RK	RU	ZAT
	Achromobacter insolitus	0(0%)	0(0%)	0(0%)	0(0%)	0(0%)	0(0%)	0(0%)	0(0%)	0(0%)	0(0%)	0	0
	Achromobacter spanius	0(0%)	0(0%)	0(0%)	0(0%)	0(0%)	0(0%)	0(0%)	0(0%)	0(0%)	0(0%)	0	0
	Acinetobacter baumannii	0(0%)	0(0%)	0(0%)	0(0%)	0(0%)	0(0%)	0(0%)	0(0%)	2(14.3%)	1(33.3%)	3	0.017
	Acinetobacter bereziniae	0(0%)	0(0%)	0(0%)	0(0%)	0(0%)	0(0%)	0(0%)	1(25%)	0(0%)	0(0%)	1	0.006
	Acinetobacter nosocomialis	0(0%)	0(0%)	0(0%)	0(0%)	0(0%)	0(0%)	0(0%)	0(0%)	0(0%)	0(0%)	0	0
	Enterobacter asburiae	0(0%)	0(0%)	0(0%)	0(0%)	0(0%)	0(0%)	0(0%)	0(0%)	2(14.3%)	0(0%)	2	0.011
	Enterobacter cloacae	0(0%)	0(0%)	0(0%)	0(0%)	1(11.1%)	0(0%)	0(0%)	0(0%)	0(0%)	0(0%)	1	0.006
	Enterobacter hormaechei	0(0%)	1(4%)	0(0%)	0(0%)	0(0%)	0(0%)	0(0%)	0(0%)	0(0%)	0(0%)	1	0.006
	Enterobacter ludwigii	0(0%)	0(0%)	0(0%)	0(0%)	0(0%)	0(0%)	0(0%)	0(0%)	0(0%)	0(0%)	0	0
	Enterobacter roggenkampii	0(0%)	0(0%)	0(0%)	0(0%)	0(0%)	0(0%)	0(0%)	0(0%)	0(0%)	0(0%)	0	0
	Escherichia coli	0(0%)	0(0%)	0(0%)	0(0%)	0(0%)	0(0%)	2(2.2%)	0(0%)	0(0%)	0(0%)	2	0.011
	Klebsiella michiganensis	0(0%)	0(0%)	0(0%)	0(0%)	0(0%)	0(0%)	0(0%)	0(0%)	0(0%)	0(0%)	0	0
	Klebsiella oxytoca	0(0%)	0(0%)	0(0%)	0(0%)	0(0%)	0(0%)	0(0%)	0(0%)	0(0%)	0(0%)	0	0
	Klebsiella pneumoniae	0(0%)	0(0%)	0(0%)	1(12.5%)	0(0%)	0(0%)	11(11.8%)	0(0%)	1(7.1%)	0(0%)	13	0.074
	Klebsiella quasipneumoniae	0(0%)	0(0%)	0(0%)	0(0%)	0(0%)	0(0%)	0(0%)	0(0%)	0(0%)	0(0%)	0	0
	Kosakonia cowanii	0(0%)	0(0%)	0(0%)	0(0%)	0(0%)	0(0%)	0(0%)	0(0%)	0(0%)	0(0%)	0	0
	Leclercia adecarboxylata	0(0%)	0(0%)	0(0%)	0(0%)	1(11.1%)	0(0%)	1(1.1%)	0(0%)	0(0%)	0(0%)	2	0.011
	Pseudomonas aeruginosa	0(0%)	0(0%)	0(0%)	0(0%)	0(0%)	0(0%)	0(0%)	0(0%)	0(0%)	0(0%)	0	0
	Pseudomonas asiatica	0(0%)	0(0%)	0(0%)	0(0%)	0(0%)	0(0%)	0(0%)	0(0%)	0(0%)	0(0%)	0	0
	Pseudomonas mendocina	0(0%)	1(4%)	0(0%)	0(0%)	0(0%)	0(0%)	0(0%)	0(0%)	0(0%)	0(0%)	1	0.006
	Pseudomonas putida	0(0%)	1(4%)	0(0%)	0(0%)	0(0%)	0(0%)	0(0%)	0(0%)	0(0%)	0(0%)	1	0.006
	Pseudomonas stutzeri	0(0%)	0(0%)	0(0%)	0(0%)	0(0%)	0(0%)	0(0%)	0(0%)	0(0%)	0(0%)	0	0
	Serratia marcescens	0(0%)	0(0%)	0(0%)	0(0%)	0(0%)	0(0%)	0(0%)	0(0%)	0(0%)	0(0%)	0	0
	Shewanella putrefaciens	0(0%)	1(4%)	0(0%)	0(0%)	0(0%)	0(0%)	0(0%)	0(0%)	0(0%)	1(33.3%)	2	0.011
	Shewanella xiamenensis	0(0%)	0(0%)	0(0%)	0(0%)	0(0%)	0(0%)	1(1.1%)	1(25%)	0(0%)	0(0%)	2	0.011
	Stenotrophomonas acidaminiphila	0(0%)	0(0%)	0(0%)	0(0%)	0(0%)	0(0%)	0(0%)	0(0%)	0(0%)	0(0%)	0	0
	Stenotrophomonas maltophilia	0(0%)	0(0%)	0(0%)	0(0%)	0(0%)	0(0%)	0(0%)	0(0%)	0(0%)	0(0%)	0	0
	Unidentified	0(0%)	0(0%)	0(0%)	0(0%)	0(0%)	0(0%)	0(0%)	0(0%)	0(0%)	0(0%)	0	0
	Total blaOXA-48-like positive isolates per hospital	0	4	0	1	2	0	15	2	5	2	Total blaOXA-48-like positive isolates	31
