# Supplementary material for: Colonisation of extended spectrum β-lactamase- and carbapenemase-producing bacteria on hospital surfaces from low-/middle-income countries
Source: Research Square preprint supplement (doi:10.21203/rs.3.rs-3209071/v1), 2023-08-04
Supplement: Supplementary file 3 [file 390601735fde688227b9b87b.xlsx]

## Sheet: species ID MALDI-TOF MS and WGS
Supplementary material. Colonisation of extended spectrum β-lactamase- and carbapenemase-producing bacteria on hospital surfaces from low-/middle-income countries
Table S5. Carbapenemase positive Gram-negative bacteria (GNB) isolates (128) out of the 175 total isolates recovered from hospital surface swabs (HSS), identified by MALDI-TOF MS and WGS. Bacterial species identified by MALDI-TOF MS and WGS are listed, and differences between both lists can be appreciated due to MALDI-TOF MS discrimination of phyletically related microorganisms. Country, hospital…
Country	Hospital site	Date	Surface category	Isolate code	MALDI-TOF MS ID	WGS bacterial ID
Nigeria	NK	2017-07-25	mobile medical equipment	NK-E84.2	Acinetobacter baumannii	Acinetobacter baumannii
Rwanda	RU	2017-07-25	ward furniture/surfaces	RU-E319.1	Enterobacter asburiae	Acinetobacter baumannii
South Africa	ZAT	ND	blank	ZAT-E765.1	Acinetobacter bereziniae	Acinetobacter baumannii
Rwanda	RU	2017-03-09	Emergency neonatal care	RU-E233.1	Acinetobacter baumannii	Acinetobacter baumannii
Nigeria	NK	ND	blank	NK-E197.1	Acinetobacter baumannii	Acinetobacter baumannii
Rwanda	RU	2016-09-09	Emergency neonatal care	RU-E125.1	Acinetobacter baumannii	Acinetobacter baumannii
Rwanda	RU	2016-09-09	mobile medical equipment	RU-E131.1	Acinetobacter baumannii	Acinetobacter baumannii
Rwanda	RU	2017-07-25	patient's zone	RU-E355.1	Acinetobacter baumannii	Acinetobacter baumannii
Nigeria	NN	2016-03-03	patient's zone	NN-E179.1	Enterobacter cloacae	Acinetobacter baumannii
Bangladesh	BC	2017-06-08	ward furniture/surfaces	BC-E347.1	Acinetobacter nosocomialis	Acinetobacter nosocomialis
Pakistan	PP	2017-01-02	Emergency neonatal care	PP-E819.1	Escherichia coli	Escherichia coli
Pakistan	PP	2016-09-11	medical equipment	PP-E639.1	Unidentified	Escherichia coli
Rwanda	RU	2017-07-25	ward furniture/surfaces	RU-E319.3	Citrobacter koseri	Enterobacter asburiae
Rwanda	RU	2017-07-25	mobile medical equipment	RU-E328.1	Klebsiella pneumoniae	Enterobacter asburiae
Pakistan	PP	2016-07-12	medical equipment	PP-E700.1	Enterobacter spp.	Enterobacter cloacae
Nigeria	NN	2017-09-01	medical equipment	NN-E423.1	Enterobacter cloacae	Enterobacter cloacae
Nigeria	NN	2017-04-10	patient's zone	NN-E499.1	Enterobacter cloacae	Enterobacter cloacae
Bangladesh	BC	2016-06-28	blank	BC-E28.1	Enterobacter cloacae	Enterobacter cloacae
Nigeria	NW	2016-05-26	Sinks and water system	NW-E48.1	Shewanella putrefaciens	Enterobacter hormaechei
Pakistan	PP	2016-06-27	Emergency neonatal care	PP-E346.1	Enterobacter cloacae	Enterobacter hormaechei
Pakistan	PP	2016-09-09	medical equipment	PP-E509.1	Pseudomonas spp.	Enterobacter hormaechei
Rwanda	RU	2016-05-19	blank	RU-E68.3	Enterobacter hormaechei	Enterobacter hormaechei
Bangladesh	BC	2017-04-19	ward furniture/surfaces	BC-E303.1	Enterobacter cloacae	Enterobacter hormaechei
Bangladesh	BC	2017-05-04	ward furniture/surfaces	BC-E317.2	Enterobacter cloacae	Enterobacter hormaechei
Bangladesh	BC	2017-09-19	blank	BC-E431.1	Enterobacter cloacae	Enterobacter hormaechei
Pakistan	PP	2016-06-07	Emergency neonatal care	PP-E370.1	Enterobacter hormaechei	Enterobacter hormaechei
Pakistan	PP	2016-08-24	ward furniture/surfaces	PP-E473.1	Enterobacter cloacae	Enterobacter hormaechei
Rwanda	RK	2016-01-08	Sinks and water system	RK-E110.2	Enterobacter hormaechei	Enterobacter hormaechei
Pakistan	PP	2016-08-07	mobile medical equipment	PP-E375.1	Enterobacter spp.	Enterobacter hormaechei
Bangladesh	BK	2017-10-17	blank	BK-E778.2	Enterobacter hormaechei	Enterobacter hormaechei
Bangladesh	BK	2017-11-14	blank	BK-E821.1	Enterobacter cloacae	Enterobacter hormaechei
Bangladesh	BK	2017-11-23	blank	BK-E837.2	Enterobacter cloacae	Enterobacter hormaechei
Pakistan	PP	2016-07-12	Emergency neonatal care	PP-E698.1	Enterobacter cloacae	Enterobacter hormaechei
Pakistan	PP	2017-06-02	medical equipment	PP-E829.1	Enterobacter cloacae	Enterobacter hormaechei
Bangladesh	BK	2017-11-07	blank	BK-E811.1	Shewanella putrefaciens	Enterobacter hormaechei
Bangladesh	BK	2017-11-16	blank	BK-E825.2	Pseudomonas aeruginosa	Enterobacter hormaechei
Bangladesh	BK	2017-11-13	blank	BK-E819.1	Enterobacter cloacae	Enterobacter hormaechei
Bangladesh	BK	2017-11-16	blank	BK-E824.1	Enterobacter cloacae	Enterobacter hormaechei
Pakistan	PP	2016-08-29	medical equipment	PP-E484.1	Enterobacter cloacae	Enterobacter hormaechei
Pakistan	PP	2017-03-05	medical equipment	PP-E1015.2	Leclercia adecarboxylata	Enterobacter hormaechei
Pakistan	PP	2017-05-05	ward furniture/surfaces	PP-E1018.1	Enterobacter cloacae	Enterobacter hormaechei
Pakistan	PP	2017-08-05	ward furniture/surfaces	PP-E1022.1	Enterobacter cloacae	Enterobacter hormaechei
Pakistan	PP	2016-11-16	Sinks and water system	PP-E651.2	Enterobacter cloacae	Enterobacter hormaechei
South Africa	ZAT	ND	blank	ZAT-E765.4	Enterobacter hormaechei	Enterobacter hormaechei
Nigeria	NK	ND	blank	NK-E179.1	Enterobacter cloacae	Enterobacter hormaechei
Nigeria	NK	ND	blank	NK-E166.1	Pseudomonas fragi	Enterobacter hormaechei
Nigeria	NK	ND	blank	NK-E171.1	Enterobacter cloacae	Enterobacter hormaechei
Pakistan	PP	2016-06-07	Emergency neonatal care	PP-E370.2	Enterobacter cloacae	Enterobacter hormaechei
Pakistan	PP	2017-04-28	ward furniture/surfaces	PP-E1001.1	Klebsiella pneumoniae	Enterobacter hormaechei
Rwanda	RK	2017-03-30	Sinks and water system	RK-E270.2	Shewanella putrefaciens	Enterobacter hormaechei
Pakistan	PP	2017-02-20	medical equipment	PP-E860.1	Enterobacter cloacae	Enterobacter hormaechei
Pakistan	PP	2017-04-24	patient's zone	PP-E991.3	Enterobacter cloacae	Enterobacter hormaechei
Bangladesh	BC	ND	blank	BC-E389.1	Enterobacter cloacae	Enterobacter hormaechei
Pakistan	PP	2016-12-26	Emergency neonatal care	PP-737.1	Enterobacter cloacae	Enterobacter hormaechei
Pakistan	PP	2016-11-07	Emergency neonatal care	PP-E379.1	Enterobacter spp.	Enterobacter hormaechei
Pakistan	PP	2017-03-17	patient's zone	PP-E911.1	Enterobacter cloacae	Enterobacter hormaechei
Pakistan	PP	2017-05-05	ward furniture/surfaces	PP-E1018.2	Enterobacter roggenkampii	Enterobacter roggenkampii
Pakistan	PP	2017-06-01	patient's zone	PP-E764.1	Klebsiella pneumoniae	Enterobacter roggenkampii
Pakistan	PP	2017-03-20	patient's zone	PP-E920.2	Enterobacter asburiae	Enterobacter roggenkampii
Pakistan	PP	2016-11-18	mobile medical equipment	PP-E660.1	Klebsiella oxytoca	Klebsiella michiganensis
Pakistan	PP	2016-12-23	medical equipment	PP-E732.3	Enterobacter spp.	Klebsiella michiganensis
Pakistan	PP	2016-07-12	medical equipment	PP-E700.2	Klebsiella michiganensis	Klebsiella michiganensis
Pakistan	PP	2016-11-07	Emergency neonatal care	PP-E379.2	Klebsiella pneumoniae	Klebsiella pneumoniae
Pakistan	PP	2016-06-20	Emergency neonatal care	PP-E332.1	Klebsiella pneumoniae	Klebsiella pneumoniae
Pakistan	PP	ND	blank	PP-E1439.1	Klebsiella pneumoniae	Klebsiella pneumoniae
Pakistan	PP	2016-05-20	patient's zone	PP-E271.1	Klebsiella pneumoniae	Klebsiella pneumoniae
Pakistan	PP	ND	blank	PP-E68.2	Klebsiella pneumoniae	Klebsiella pneumoniae
Pakistan	PP	2017-01-02	Emergency neonatal care	PP-E819.3	Klebsiella pneumoniae	Klebsiella pneumoniae
Pakistan	PP	2016-10-08	Emergency neonatal care	PP-E444.1	Klebsiella pneumoniae	Klebsiella pneumoniae
Pakistan	PP	2017-03-29	ward furniture/surfaces	PP-E938.1	klebsiella pneumoniae	Klebsiella pneumoniae
Pakistan	PP	2017-12-05	patient's zone	PP-E1031.1	klebsiella pneumoniae	Klebsiella pneumoniae
Pakistan	PP	ND	blank	PP-E1219.3	Klebsiella pneumoniae	Klebsiella pneumoniae
Pakistan	PP	2016-06-13	Emergency neonatal care	PP-E319.1	Enterobacter spp.	Klebsiella pneumoniae
Pakistan	PP	2016-05-27	patient's zone	PP-E283.1	Klebsiella pneumoniae	Klebsiella pneumoniae
Pakistan	PP	2016-06-24	medical equipment	PP-E341.1	Klebsiella pneumoniae	Klebsiella pneumoniae
Pakistan	PP	2016-12-19	patient's zone	PP-E723.1	Klebsiella pneumoniae	Klebsiella pneumoniae
Pakistan	PP	ND	blank	PP-E165.1	Klebsiella pneumoniae	Klebsiella pneumoniae
Pakistan	PP	2017-03-13	Emergency neonatal care	PP-E901.1	Klebsiella pneumoniae	Klebsiella pneumoniae
Pakistan	PP	2016-05-16	medical equipment	PP-E259.2	Klebsiella pneumoniae	Klebsiella pneumoniae
Pakistan	PP	2016-11-18	Emergency neonatal care	PP-E659.1	Klebsiella pneumoniae	Klebsiella pneumoniae
Nigeria	NN	2016-06-24	blank	NN-E269.1	Klebsiella pneumoniae	Klebsiella pneumoniae
Pakistan	PP	2017-01-16	medical equipment	PP-E785.1	Klebsiella pneumoniae	Klebsiella pneumoniae
Pakistan	PP	2017-02-24	ward furniture/surfaces	PP-E870.1	Klebsiella pneumoniae	Klebsiella pneumoniae
Pakistan	PP	2016-05-30	mobile medical equipment	PP-E290.1	Klebsiella pneumoniae	Klebsiella pneumoniae
Pakistan	PP	2016-12-30	Emergency neonatal care	PP-E748.1	Klebsiella pneumoniae	Klebsiella pneumoniae
Pakistan	PP	2016-11-18	mobile medical equipment	PP-E660.2	Klebsiella pneumoniae	Klebsiella pneumoniae
Pakistan	PP	2016-09-09	medical equipment	PP-E509.2	Klebsiella pneumoniae	Klebsiella pneumoniae
Pakistan	PP	2017-08-05	patient's zone	PP-E1023.1	Klebsiella pneumoniae	Klebsiella pneumoniae
Rwanda	RU	2017-07-25	patient's zone	RU-E344.2	Enterobacter cloacae	Klebsiella pneumoniae
Pakistan	PP	ND	blank	PP-E165.2	Klebsiella pneumoniae	Klebsiella pneumoniae
Pakistan	PP	2017-03-15	patient's zone	PP-E907.1	Pseudomonas spp.	Klebsiella pneumoniae
Pakistan	PP	2016-05-27	patient's zone	PP-E286.1	Klebsiella pneumoniae	Klebsiella pneumoniae
Pakistan	PP	2016-12-30	Sinks and water system	PP-E747.2	Klebsiella pneumoniae	Klebsiella pneumoniae
Pakistan	PP	ND	blank	PP-1465.1	Klebsiella pneumoniae	Klebsiella pneumoniae
Pakistan	PP	2016-09-21	patient's zone	PP-E535.1	Klebsiella pneumoniae	Klebsiella pneumoniae
Pakistan	PP	2017-02-22	mobile medical equipment	PP-E864.1	Citrobacter freundii	Klebsiella pneumoniae
Pakistan	PP	2016-05-27	patient's zone	PP-E285.1	Klebsiella pneumoniae	Klebsiella pneumoniae
Pakistan	PP	2016-06-20	medical equipment	PP-E334.1	Klebsiella pneumoniae	Klebsiella pneumoniae
Pakistan	PP	2016-07-10	medical equipment	PP-E567.1	Klebsiella pneumoniae	Klebsiella pneumoniae
Pakistan	PP	2017-04-01	Emergency neonatal care	PP-E756.1	Klebsiella pneumoniae	Klebsiella pneumoniae
Nigeria	NN	2016-02-17	Sinks and water system	NN-E164.1	Klebsiella pneumoniae	Klebsiella quasipneumoniae
Pakistan	PP	2016-12-10	medical equipment	PP-E580.1	Klebsiella pneumoniae	Klebsiella quasipneumoniae
Pakistan	PP	2017-03-05	Sinks and water system	PP-E1013.2	Leclercia adecarboxylata	Leclercia adecarboxylata
Pakistan	PP	2017-05-05	patient's zone	PP-E1019.2	Leclercia adecarboxylata	Leclercia adecarboxylata
Pakistan	PP	ND	blank	PP-E1103.1	Leclercia adecarboxylata	Leclercia adecarboxylata
Pakistan	PP	2017-03-29	mobile medical equipment	PP-E937.2	Leclercia adecarboxylata	Leclercia adecarboxylata
Pakistan	PP	2017-04-24	patient's zone	PP-E991.1	Leclercia adecarboxylata	Leclercia adecarboxylata
Pakistan	PP	2017-05-05	Emergency neonatal care	PP-E1017.1	Leclercia adecarboxylata	Leclercia adecarboxylata
Pakistan	PP	2017-03-05	patient's zone	PP-E1014.1	Leclercia adecarboxylata	Leclercia adecarboxylata
Pakistan	PP	2017-10-05	Emergency neonatal care	PP-E1029.1	Leclercia adecarboxylata	Leclercia adecarboxylata
Pakistan	PP	2017-03-24	Emergency neonatal care	PP-E929.1	Leclercia adecarboxylata	Leclercia adecarboxylata
Bangladesh	BC	2017-05-04	ward furniture/surfaces	BC-E317.1	Pseudomonas putida group	Pseudomonas asiatica
Bangladesh	BC	2017-02-22	Sinks and water system	BC-E258.1	Pseudomonas mendocina	Pseudomonas mendocina
Pakistan	PP	ND	blank	PP-E68.1	Pseudomonas putida group	Pseudomonas putida
Bangladesh	BC	2016-08-09	medical equipment	BC-E71.1	Serratia marcescens	Serratia marcescens
Bangladesh	BC	2016-08-04	Sinks and water system	BC-E65.1	Serratia marcescens	Serratia marcescens
Pakistan	PP	2016-09-19	medical equipment	PP-E527.1	Serratia spp.	Serratia marcescens
Bangladesh	BK	2017-10-24	blank	BK-E792.1	Serratia marcescens	Serratia marcescens
Bangladesh	BK	2017-08-24	blank	BK-E702.1	Serratia marcescens	Serratia marcescens
Bangladesh	BK	2017-10-04	blank	BK-E759.1	Serratia marcescens	Serratia marcescens
Bangladesh	BK	2017-11-16	blank	BK-E825.1	Serratia marcescens	Serratia marcescens
Bangladesh	BK	2017-11-23	blank	BK-E836.1	Enterobacter cloacae	Serratia marcescens
Ethiopia	ES	2017-08-01	Sinks and water system	ESI-E0001.1	Shewanella putrefaciens	Serratia marcescens
Rwanda	RK	2017-03-30	Sinks and water system	RK-E270.1	Enterobacter cloacae	Shewanella xiamenensis
Pakistan	PP	2016-02-09	medical equipment	PP-E493.1	Shewanella putrefaciens	Shewanella xiamenensis
Bangladesh	BK	2017-10-17	blank	BK-E778.1	Stenotrophomonas acidaminiphila	Stenotrophomonas acidaminiphila
Bangladesh	BK	2017-06-10	blank	BK-E578.1	Stenotrophomonas maltophilia	Stenotrophomonas maltophilia
Pakistan	PP	2016-07-12	patient's zone	PP-E699.1	Kosakonia cowanii	Unidentified
