# Supplementary material for: Colonisation of extended spectrum β-lactamase- and carbapenemase-producing bacteria on hospital surfaces from low-/middle-income countries
Source: Research Square preprint supplement (doi:10.21203/rs.3.rs-3209071/v1), 2023-08-04
Supplement: Supplementary file 4 [file 3c69127504420f276bb3f381.xlsx]

## Sheet: Sheet1
	Supplementary material. Colonisation of extended spectrum β-lactamase- and carbapenemase-producing bacteria on hospital surfaces from low-/middle-income countries
	Table S10. BARNARDS group. List of countries enrolled in BARNARDS study, with individuals who provided help during the research, their forenames, surnames, position, and affiliation.
	Country	Forename	Surname	Position	Affiliation
	Bangladesh	Samir	Saha	PI	Chittagong Medical College Hospital, Bangladesh
	Bangladesh	Maksuda	Islam	scientist	Chittagong Medical College Hospital, Bangladesh
	Bangladesh	Zabed	Bin-Ahmed	scientist	Chittagong Medical College Hospital, Bangladesh
	Bangladesh	Wazir	Ahmed	clinician	Chittagong Medical College Hospital, Bangladesh
	Bangladesh	Taslima	Begum	clinician	Chittagong Medical College Hospital, Bangladesh
	Bangladesh	Mitu	Chowdhury	scientist	Chittagong Medical College Hospital, Bangladesh
	Bangladesh	Shaila	Sharmin	scientist	Chittagong Medical College Hospital, Bangladesh
	Bangladesh	Chumki	Rani Dey	Research nurse	Chittagong Medical College Hospital, Bangladesh
	Bangladesh		Uttam	scientist	Chittagong Medical College Hospital, Bangladesh
	Bangladesh	Abdul	Matin	clinician	Kumudini Women's Medical College, Bangladesh
	Bangladesh	Sowmitra Ranjan	Chakraborty	scientist	Kumudini Women's Medical College, Bangladesh
	Bangladesh	Sadia	Tasmin	clinician	Kumudini Women's Medical College, Bangladesh
	Bangladesh	Dipa	Rema	Research nurse	Kumudini Women's Medical College, Bangladesh
	Bangladesh	Rashida	Khatun	Research nurse	Kumudini Women's Medical College, Bangladesh
	Bangladesh	Liza	Nath	Research nurse	Kumudini Women's Medical College, Bangladesh
	Ethiopia	Nigatu	Balkachew	clinician	Department of Ob-Gyn, Saint Paul’s Hospital Millennium Medical College
	Ethiopia	Delayehu	Bekele	Co-PI	Obstetrics and Gynaecology, Saint Paul’s Hospital Millennium Medical College
	Ethiopia	Katherine	Schaughency	Data manager	Saint Paul’s Hospital Millennium Medical College
	Ethiopia	Semaria	Solomon	laboratory	Department of Microbiology, Immunology and Parasitology, Saint Paul’s Hospital Millennium Medical College
	Ethiopia	Zenebe	Gebreyohanes	laboratory	Department of Microbiology, Immunology and Parasitology, Saint Paul’s Hospital Millennium Medical College
	Ethiopia	Rozina	Ambachew	laboratory	Department of Microbiology, Immunology and Parasitology, Saint Paul’s Hospital Millennium Medical College
	Ethiopia	Oludare	Odumade	clinician	Department of Pediatrics, Boston Children’s Hospital Harvard Medical School
	Ethiopia	Misgana	Haileselassie	nurse	Saint Paul’s Hospital Millennium Medical College
	Ethiopia	Grace	Chan	PI	Paediatrics, Harvard Medical School
	Ethiopia	Abigail	Russo	Project manager	Global Health Research Program Manager, Boston Children’s Hospital
	Ethiopia	Redeat	Workneh	Project manager	Department of Pediatrics and Child Health, Saint Paul’s Hospital Millennium Medical College
	Ethiopia	Gesit	Metaferia	clinician	Department of Pediatrics, Saint Paul’s Hospital Millennium Medical College
	Ethiopia	Mahlet	Abayneh		Saint Paul’s Hospital Millennium Medical College
	Ethiopia	Yahya Zekaria	Mohammed		Birhan for Mothers and Children Program, Saint Paul’s Hospital Millennium Medical College
	Ethiopia	Tefera	Biteye		Birhan for Mothers and Children Program, Saint Paul’s Hospital Millennium Medical College
	Ethiopia	Alula	Teklu	scientist	Saint Paul’s Hospital Millennium Medical College
	Ethiopia	Wendimagegn	Gezahegn	clinician	Department of Pediatrics, Saint Paul’s Hospital Millennium Medical College
	India	Partha Sarathi	Chakravorty	clinician	Obstetrics & Gynecology, IPGMER & SSKM Hospital
	India	Anuradha	Mukherjee	clinician	Division of Bacteriology, ICMR-National Institute of Cholera and Enteric Diseases,Kolkata-700010,India
	India	Ranjan Kumar	Nandy	Co-PI	Scientist-F, Division of Bacteriology, ICMR-National Institute of Cholera and Enteric Diseases
	India	Samarpan	Roy	Data entry operator	ICMR-National Institute of Cholera and Enteric Diseases
	India	Anuradha	Sinha	Deputy manager	R&D, Zydus Cadila
	India	Sharmi	Naha	laboratory	ICMR-SRF, Division of Bacteriology, ICMR-National Institute of Cholera and Enteric Diseases
	India	Sukla Saha	Malakar	laboratory	ICMR-National Institute of Cholera and Enteric Diseases
	India	Siddhartha	Bose	laboratory	Medical Laboratory Technologist, Swasthya Bhawan
	India	Monaki	Majhi	laboratory	Baruipur SD Hospital
	India	Subhasree	Sahoo	nurse
	India	Putul	Mukherjee	nurse
	India	Sumitra Kumari	Routa	nurse
	India	Chaitali	Nandi	nurse
	India	Sulagna	Basu	PI	Scientist F, Division of BacteriologyICMR-National Institute of Cholera and Enteric Diseases,
	India	Bijan	Saha	scientist	Neonatology, IPGMER & SSKM Hospital
	India	Pinaki	Chattopadhyay	scientist	Neonatal Microbiology, IPGMER & SSKM Hospital
	Nigeria	Fatima Zara Isa	Modibbo	clinician	54gene
	Nigeria	Stella	Uwaezuoke	clinician	Federal Medical Centre Jabi, Abuja, Nigeria
	Nigeria	Dilichukwu	Meduekwe	clinician	Wuse District Hospital, Nigeria
	Nigeria	Khairiyya	Muhammad	laboratory	National Hospital Abuja, Nigeria
	Nigeria	Queen	Nsude	laboratory	Wuse District Hospital, Nigeria
	Nigeria	Ifeoma	Ukeh	laboratory	National Hospital Abuja, Nigeria
	Nigeria	Mary-Joe	Okenu	laboratory	National Hospital Abuja, Nigeria
	Nigeria	Akpulu	Chinenye	laboratory	National Hospital Abuja, Nigeria
	Nigeria	Samuel	Yakubu	laboratory	National Hospital Abuja, Nigeria
	Nigeria	Vivian	Asunugwo	laboratory	Wuse District Hospital, Nigeria
	Nigeria	Folake	Aina	NYS Corp Member	National Hospital Abuja, Nigeria
	Nigeria	Isibong	Issy	NYS Corp Member	National Hospital Abuja, Nigeria
	Nigeria	Dolapo	Adekeye	NYS Corp Member	National Hospital Abuja, Nigeria
	Nigeria	Adiele	Eunice	nurse	Wuse District Hospital, Nigeria
	Nigeria	Abdulmlik	Amina	nurse	Wuse District Hospital, Nigeria
	Nigeria	R	Oyewole	nurse	National Hospital Abuja, Nigeria
	Nigeria	I	Oloton	nurse	National Hospital Abuja, Nigeria
	Nigeria	BC	Nnaji	nurse	National Hospital Abuja, Nigeria
	Nigeria	M	Umejiego	nurse	National Hospital Abuja, Nigeria
	Nigeria	PN	Anoke	nurse	National Hospital Abuja, Nigeria
	Nigeria	S	Adebayo	nurse	National Hospital Abuja, Nigeria
	Nigeria	GO	Abegunrin	nurse	National Hospital Abuja, Nigeria
	Nigeria	OB	Omotosho	nurse	National Hospital Abuja, Nigeria
	Nigeria	R	Ibrahim	nurse	National Hospital Abuja, Nigeria
	Nigeria	B	Igwe	nurse	National Hospital Abuja, Nigeria
	Nigeria	M	Abroko	nurse	National Hospital Abuja, Nigeria
	Nigeria	K	Balami	nurse	National Hospital Abuja, Nigeria
	Nigeria	L	Bayem	nurse	National Hospital Abuja, Nigeria
	Nigeria	C	Anyanwu	nurse	National Hospital Abuja, Nigeria
	Nigeria	H	Haruna	nurse	National Hospital Abuja, Nigeria
	Nigeria	J	Okike	nurse	National Hospital Abuja, Nigeria
	Nigeria	K	Goroh	nurse	National Hospital Abuja, Nigeria
	Nigeria	M	Boi-Sunday	nurse	National Hospital Abuja, Nigeria
	Nigeria	Augusta	Ugafor	nurse	National Hospital Abuja, Nigeria
	Nigeria	Maryam	Makama	nurse	National Hospital Abuja, Nigeria
	Nigeria	Kaniba	Ndukwe	nurse	National Hospital Abuja, Nigeria
	Nigeria	Anastesia	Odama	nurse	National Hospital Abuja, Nigeria
	Nigeria	Hadiza	Yusuf	nurse	National Hospital Abuja, Nigeria
	Nigeria	Patience	Wachukwu	nurse	National Hospital Abuja, Nigeria
	Nigeria	Kachalla	Yahaya	nurse	National Hospital Abuja, Nigeria
	Nigeria	Titus	Kalade Colsons	nurse	National Hospital Abuja, Nigeria
	Nigeria	Mercy	Kura	nurse	National Hospital Abuja, Nigeria
	Nigeria	Damilola	Orebiyi	nurse	National Hospital Abuja, Nigeria
	Nigeria	Kenneth C.	Iregbu	PI	National Hospital Abuja, Nigeria
	Nigeria	Chukwuemeka	Mmadueke	clinician	Wuse District Hospital, Nigeria
	Nigeria	Lamidi	Audu	clinician	National Hospital Abuja, Nigeria
	Nigeria	Nura	Idris	clinician	Director Kano State Health Trust Fund
	Nigeria	Safiya	Gambo	clinician	Murtala Muhammad Specialist Hospital, Nigeria
	Nigeria	Jamila	Ibrahim	clinician	Department of paediatric Muhammad Abdullahi Wase Teaching Hospital
	Nigeria	Edwin	Precious	scientist	Department of Microbiology Aminu Kano Teaching Hospital
	Nigeria	Ashiru	Hassan		Murtala Muhammad Specialist Hospital, Nigeria
	Nigeria	Shamsudden	Gwadabe	scientist	Department of Physiology NorthWest University Kano
	Nigeria	Adeola	Adeleye Falola	scientist	54gene
	Nigeria	Muhammad	Aliyu	scientist	Murtala Muhammad Specialist Hospital, Nigeria
	Nigeria	Amina	Ibrahim	scientist	Murtala Muhammad Specialist Hospital, Nigeria
	Nigeria	Aisha Sani	Mukaddas	scientist	Murtala Muhammad Specialist Hospital, Nigeria
	Nigeria	Rashida Yakubu	Khalid	scientist	Murtala Muhammad Specialist Hospital, Nigeria
	Nigeria	Fatima Ibrahim	Alkali	scientist	Murtala Muhammad Specialist Hospital, Nigeria
	Nigeria	Maryam Yahaya	Muhammad	scientist	Murtala Muhammad Specialist Hospital, Nigeria
	Nigeria	Fatima Mohammad	Tukur	scientist	Murtala Muhammad Specialist Hospital, Nigeria
	Nigeria	Surayya Mustapha	Muhammad	scientist	Department of Biotechnology Federal University Dutse
	Nigeria	Adeola	Shittu	scientist	Murtala Muhammad Specialist Hospital, Nigeria
	Nigeria	Murjanatu	Bello	scientist	Murtala Muhammad Specialist Hospital, Nigeria
	Nigeria	Muhammad Abubakar	Hassan	scientist	Murtala Muhammad Specialist Hospital, Nigeria
	Nigeria	Fatima Habib	Sa ad	scientist	Murtala Muhammad Specialist Hospital, Nigeria
	Nigeria	Aishatu	Kassim	scientist	Murtala Muhammad Specialist Hospital, Nigeria
	Pakistan	Haider	Shirazi	Co-PI	Neonatology Department, Pakistan Institute of Medical Sciences
	Pakistan	Adil	Muhammad	laboratory	Department of Microbiology, Quaid-i-Azam University, Islamabad 45320, Pakistan
	Pakistan	Rabaab	Zahra	PI	Department of Microbiology, Quaid-i-Azam University, Islamabad 45320, Pakistan
	Pakistan	Syed Najeeb	Ullah	scientist	Department of Microbiology, Quaid-i-Azam University, Islamabad 45320, Pakistan
	Pakistan	Muhammad	Hilal Jan	project manager	Department of Microbiology, Quaid-i-Azam University, Islamabad 45320, Pakistan
	Pakistan	Rubina	Kamran	clinician	Pakistan Institute of Medical Sciences
	Pakistan		Sajana	research nurse	Pakistan Institute of Medical Sciences
	Pakistan	Jazba	Saeed	research nurse	Pakistan Institute of Medical Sciences
	Pakistan	Noreen	Maqsood	research nurse	Pakistan Institute of Medical Sciences
	Pakistan	Maria	Zafar	research nurse	Pakistan Institute of Medical Sciences
	Pakistan	Saraeen	Sadiq	research nurse	Pakistan Institute of Medical Sciences
	Pakistan	Sumble	Ahsan	research nurse	Pakistan Institute of Medical Sciences
	Pakistan	Madiha	Tariq	scientist	Pakistan Institute of Medical Sciences
	Pakistan	Sidra	Sajid	scientist	Pakistan Institute of Medical Sciences
	Pakistan	Hasma	Mustafa	scientist	Pakistan Institute of Medical Sciences
	Pakistan	Anees-ur	Rehman	local project manager	Pakistan Institute of Medical Sciences
	Pakistan	Atif	Muhammad	local project manager	Pakistan Institute of Medical Sciences
	Pakistan	Gahssan	Mehmood	local project manager	Pakistan Institute of Medical Sciences
	Pakistan	Mahnoor	Nisar	local project manager	Pakistan Institute of Medical Sciences
	Pakistan	Shermeen	Akif	local project manager	Pakistan Institute of Medical Sciences
	Pakistan	Tahira	Yasmeen	local project manager	Pakistan Institute of Medical Sciences
	Pakistan	Sabir	Nawaz	community coordinator	Pakistan Institute of Medical Sciences
	Pakistan	Anam Shanal	Atta	community coordinator	Pakistan Institute of Medical Sciences
	Pakistan	Mian	Laiq-ur-Rehman	community coordinator	Pakistan Institute of Medical Sciences
	Pakistan	Robina	Kousar	community nurse	Pakistan Institute of Medical Sciences
	Pakistan	Kalsoom	Bibi	community nurse	Pakistan Institute of Medical Sciences
	Pakistan	Kosar	Waheed	community nurse	Pakistan Institute of Medical Sciences
	Pakistan	Zainab	Majeed	community nurse	Pakistan Institute of Medical Sciences
	Pakistan	Ayesha	Jalil	data support	Pakistan Institute of Medical Sciences
	Rwanda	Espoir	Kajibwami	clinician	Kabgayi Hospital, Kabgayi, Gitarama, Rwanda
	Rwanda	Aniceth	Rucogoza	laboratory	Microbiology Laboratory Director, National Reference Laboratory Rwanda.
	Rwanda	Innocent	Nzabahimana	laboratory	The University Teaching Hostpial (CHUK), Kigali, Rwanda
	Rwanda	Mazarati	Jean-Baptiste	PI	Head of Biomedical Services National Reference Laboratory, Kigali Rwanda
	Rwanda	Lucie	Gaju	project manager	The University Teaching Hostpial (CHUK), Rwanda
	Rwanda	Kankundiye	Riziki	nurse/scientist	The University Teaching Hostpial (CHUK), Kigali, Rwanda
	Rwanda	Brigette	Uwamahoro	nurse/scientist	The University Teaching Hostpial (CHUK), Kigali, Rwanda
	Rwanda	Rachel	Uwera	nurse/scientist	The University Teaching Hostpial (CHUK), Kigali, Rwanda
	Rwanda	Eugenie	Nyiratuza	nurse/scientist	The University Teaching Hostpial (CHUK), Kigali, Rwanda
	Rwanda	Kumwami	Muzungu	nurse/scientist	The University Teaching Hostpial (CHUK), Kigali, Rwanda
	Rwanda	Violette	Uwitonze	nurse/scientist	Kabgayi Hospital, Kabgayi, Gitarama, Rwanda
	Rwanda	Marie C	Horanimpundu	nurse/scientist	Kabgayi Hospital, Kabgayi, Gitarama, Rwanda
	Rwanda	Francine	Nzeyimana	nurse/scientist	Kabgayi Hospital, Kabgayi, Gitarama, Rwanda
	Rwanda	Prince	Mitima	nurse/scientist	Kabgayi Hospital, Kabgayi, Gitarama, Rwanda
	South Africa	Angela	Dramowski	clinician	Department of Paediatrics and child health, Stellenbosch University, Stellenbosch, Cape Town
	South Africa	Andrew	Whitelaw	Co-PI	Division of Medical Microbiology, Stellenbosch University, Tygerberg Hospital, Cape Town
	South Africa	Lauren	Paterson	laboratory	Division of Medical Microbiology, Stellenbosch University, Tygerberg Hospital, Cape Town
	South Africa	Mary	Frans	nurse	Tygerberg Hospital, Cape Town
	South Africa	Marvina	Johnson	nurse	Tygerberg Hospital, Cape Town
	South Africa	Eveline	Swanepoel	nurse	Tygerberg Hospital, Cape Town
	South Africa	Zoleka	Bojana	nurse	Tygerberg Hospital, Cape Town
	South Africa	Mieme	du Preez	nurse	Tygerberg Hospital, Cape Town
	South Africa	Shaheen	Mehtar	PI	Faculty of Medicine and Health Sciences, Unit for Infection Prevention and Control, Stellenbosch University
	South Africa	Andre	Bulabula	scientist	Faculty of Medicine and Health Sciences, Unit for Infection Prevention and Control, Stellenbosch University
	The Netherlands	Feiyan	Liu	scientist	Leiden Academic Centre for Drug Research, Leiden University, Leiden, The Netherlands
	The Netherlands	Johan GC	van Hasselt	scientist	Leiden Academic Centre for Drug Research, Leiden University, Leiden, The Netherlands
	UK	Timothy	Walsh	PI	Institute of Infection and Immunity, School of Medicine, Cardiff University
	UK	Kirsty	Sands	scientist	Institute of Infection and Immunity, School of Medicine, Cardiff University
	UK	Maria	Carvalho	scientist	Institute of Infection and Immunity, School of Medicine, Cardiff University
	UK	Rebecca	Milton	project manager	Institute of Infection and Immunity, School of Medicine, Cardiff University
	UK	Kathryn	Thomson	scientist	Institute of Infection and Immunity, School of Medicine, Cardiff University
	UK	Edward	Portal	scientist	Institute of Infection and Immunity, School of Medicine, Cardiff University
	UK	Jordan	Mathias	scientist	Institute of Infection and Immunity, School of Medicine, Cardiff University
	UK	Calie	Dyer	Data manager	Institute of Infection and Immunity, School of Medicine, Cardiff University
	UK	Ana	Ferreira	scientist	Institute of Infection and Immunity, School of Medicine, Cardiff University
	UK	Robert	Andrews	scientist	Institute of Infection and Immunity, School of Medicine, Cardiff University
	UK	John	Watkins	scientist	Institute of Infection and Immunity, School of Medicine, Cardiff University
	UK	David	Gillespie	scientist	Centre for Trials Research, Cardiff University
	UK	Kerry	Hood	Co-PI	Centre for Trials Research, Cardiff University
	UK	Katie	Taiyai	scientist	Centre for Trials Research, Cardiff University
	UK	Nigel	Kirby	scientist	Centre for Trials Research, Cardiff University
	UK	Maria	Nieto	scientist	Institute of Infection and Immunity, School of Medicine, Cardiff University
	UK	Thomas	Hender	scientist	Institute of Infection and Immunity, School of Medicine, Cardiff University
	UK	Patrick	Hogan	scientist	Institute of Infection and Immunity, School of Medicine, Cardiff University
	UK	Habiba	Saif	scientist	Institute of Infection and Immunity, School of Medicine, Cardiff University
	UK	Brekhna	Hassan	scientist	Institute of Infection and Immunity, School of Medicine, Cardiff University
	UK	Ellis	Jones	scientist	Institute of Infection and Immunity, School of Medicine, Cardiff University
	UK	Matthew	Barrell	scientist	Institute of Infection and Immunity, School of Medicine, Cardiff University
	UK	Ian	Boostrom	scientist	Institute of Infection and Immunity, School of Medicine, Cardiff University
	UK	Francis	Frayne	scientist	Institute of Infection and Immunity, School of Medicine, Cardiff University
	UK	Jessica	Rees	scientist	Institute of Infection and Immunity, School of Medicine, Cardiff University
	UK	Lim	Jones	clinician	Specialist Antimicrobial Chemotherapy Unit, Public Heath Wales, Cardiff, UK
	UK	Susanna	Dunachie	scientist	Centre for Tropical Medicine and Global Health, Nuffield Department of Medicine, University of Oxford
	UK	Brad	Spiller	scientist	Institute of Infection and Immunity, School of Medicine, Cardiff University
	UK	Julian	Parkhill	scientist	Cambridge Infectious Diseases, Department of Veterinary Medicine, Cambridge University
