# Supplementary material for: Colonisation of extended spectrum β-lactamase- and carbapenemase-producing bacteria on hospital surfaces from low-/middle-income countries
Source: Research Square preprint supplement (doi:10.21203/rs.3.rs-3209071/v1), 2023-08-04
Supplement: Supplementary file 5 [file 4aadfc185815c699c56f77e9.xlsx]

## Sheet: 4126 Ind surf - ARG%
	Supplementary material. Colonisation of extended spectrum β-lactamase- and carbapenemase-producing bacteria on hospital surfaces from low-/middle-income countries ​
	Table S3. n (%) of positive and negative hospital surface swabs (HSS) for an antimicrobial resistance gene (ARG) out of the total 4,126 among the 309 individual surfaces. The total number of samples collected per individual surface (over 4,126) was used as denominator to calculate the prevalence of each ARG per each individual surface. The total percentage of ARG prevalence on a specific individu…
	309 individual surfaces	blaCTX-M-15 positive	blaCTX-M-15 negative	blaNDM positive	blaNDM negative	blaOXA-48-like positive	blaOXA-48-like negative	Total samples per individual surface (over 4,126)
	Basin	42(17.28%)	111(45.68%)	28(11.52%)	149(61.32%)	6(2.47%)	171(70.37%)	243(5.89%)
	Oxygen cannola	2(28.57%)	4(57.14%)	0(0%)	6(85.71%)	0(0%)	6(85.71%)	7(0.17%)
	floor	5(14.29%)	22(62.86%)	5(14.29%)	26(74.29%)	0(0%)	31(88.57%)	35(0.85%)
	oxygen mask	9(12.68%)	22(30.99%)	6(8.45%)	31(43.66%)	2(2.82%)	35(49.3%)	71(1.72%)
	tray	0(0%)	6(85.71%)	0(0%)	7(100%)	0(0%)	7(100%)	7(0.17%)
	stethoscope and sphygmomanometer	11(11.58%)	42(44.21%)	7(7.37%)	45(47.37%)	1(1.05%)	51(53.68%)	95(2.3%)
	suction tube	3(12.5%)	13(54.17%)	0(0%)	17(70.83%)	0(0%)	17(70.83%)	24(0.58%)
	Labour room baby radiant warmer seat	0(0%)	1(100%)	0(0%)	0(0%)	0(0%)	0(0%)	1(0.02%)
	Seat	3(11.54%)	17(65.38%)	3(11.54%)	21(80.77%)	1(3.85%)	23(88.46%)	26(0.63%)
	kidney tray	0(0%)	15(50%)	3(10%)	16(53.33%)	0(0%)	19(63.33%)	30(0.73%)
	Dustbin	5(20%)	9(36%)	4(16%)	14(56%)	0(0%)	18(72%)	25(0.61%)
	Gynecologist seat	0(0%)	2(100%)	0(0%)	2(100%)	0(0%)	2(100%)	2(0.05%)
	baby tray	2(22.22%)	6(66.67%)	0(0%)	9(100%)	0(0%)	9(100%)	9(0.22%)
	Radiant warmer seat	1(14.29%)	6(85.71%)	0(0%)	7(100%)	0(0%)	7(100%)	7(0.17%)
	Incubator	54(16.17%)	82(24.55%)	13(3.89%)	111(33.23%)	3(0.9%)	121(36.23%)	334(8.1%)
	Basket	12(34.29%)	13(37.14%)	0(0%)	22(62.86%)	0(0%)	22(62.86%)	35(0.85%)
	neonatal floor	0(0%)	1(100%)	1(100%)	0(0%)	0(0%)	1(100%)	1(0.02%)
	suction bottle	7(23.33%)	9(30%)	4(13.33%)	14(46.67%)	1(3.33%)	17(56.67%)	30(0.73%)
	Bed	10(20.41%)	19(38.78%)	0(0%)	31(63.27%)	0(0%)	31(63.27%)	49(1.19%)
	Baby's table	16(17.98%)	57(64.04%)	5(5.62%)	68(76.4%)	0(0%)	73(82.02%)	89(2.16%)
	suction bulb	9(20%)	32(71.11%)	2(4.44%)	39(86.67%)	0(0%)	41(91.11%)	45(1.09%)
	Labour table	13(19.7%)	52(78.79%)	9(13.64%)	56(84.85%)	1(1.52%)	64(96.97%)	66(1.6%)
	Dressing table	0(0%)	1(100%)	0(0%)	1(100%)	0(0%)	1(100%)	1(0.02%)
	Wheelchair	1(33.33%)	2(66.67%)	0(0%)	3(100%)	0(0%)	3(100%)	3(0.07%)
	Baby's cot	7(13.73%)	6(11.76%)	0(0%)	12(23.53%)	0(0%)	12(23.53%)	51(1.24%)
	Mattress	15(44.12%)	6(17.65%)	1(2.94%)	21(61.76%)	0(0%)	22(64.71%)	34(0.82%)
	Baby weighing scale	8(15.09%)	13(24.53%)	2(3.77%)	18(33.96%)	0(0%)	20(37.74%)	53(1.28%)
	Ambu bag (bag valve mask) and accessories	6(16.22%)	10(27.03%)	4(10.81%)	14(37.84%)	0(0%)	18(48.65%)	37(0.9%)
	weighing scale	19(17.43%)	35(32.11%)	6(5.5%)	47(43.12%)	1(0.92%)	52(47.71%)	109(2.64%)
	Oxygen tube	2(6.25%)	3(9.38%)	0(0%)	5(15.63%)	0(0%)	5(15.63%)	32(0.78%)
	baby tube	1(16.67%)	5(83.33%)	0(0%)	6(100%)	0(0%)	6(100%)	6(0.15%)
	Sink	34(31.48%)	35(32.41%)	4(3.7%)	63(58.33%)	8(7.41%)	59(54.63%)	108(2.62%)
	Baby's corner	1(6.25%)	1(6.25%)	0(0%)	6(37.5%)	0(0%)	6(37.5%)	16(0.39%)
	Delivery couch	2(4.26%)	16(34.04%)	0(0%)	23(48.94%)	0(0%)	23(48.94%)	47(1.14%)
	Delivery sheet	0(0%)	0(0%)	0(0%)	0(0%)	0(0%)	0(0%)	1(0.02%)
	Cardiotocography monitor	4(30.77%)	3(23.08%)	0(0%)	4(30.77%)	0(0%)	4(30.77%)	13(0.32%)
	medical suction machine	1(4%)	2(8%)	1(4%)	6(24%)	0(0%)	7(28%)	25(0.61%)
	intravenous (IV) line and accessories	8(3.38%)	33(13.92%)	2(0.84%)	52(21.94%)	1(0.42%)	53(22.36%)	237(5.74%)
	Radiant warmer's water	0(0%)	0(0%)	0(0%)	0(0%)	0(0%)	0(0%)	1(0.02%)
	Fetoscope	0(0%)	0(0%)	0(0%)	0(0%)	0(0%)	0(0%)	2(0.05%)
	Trolley	10(15.15%)	15(22.73%)	1(1.52%)	27(40.91%)	0(0%)	28(42.42%)	66(1.6%)
	medication tray	0(0%)	2(50%)	0(0%)	4(100%)	0(0%)	4(100%)	4(0.1%)
	Bed screen	0(0%)	0(0%)	0(0%)	1(50%)	0(0%)	1(50%)	2(0.05%)
	Bed linen	0(0%)	1(100%)	0(0%)	1(100%)	0(0%)	1(100%)	1(0.02%)
	Mobile light stand	0(0%)	0(0%)	0(0%)	0(0%)	0(0%)	0(0%)	1(0.02%)
	Oxygen gauge	0(0%)	0(0%)	0(0%)	0(0%)	0(0%)	0(0%)	1(0.02%)
	Radiant warmer	45(23.68%)	43(22.63%)	12(6.32%)	65(34.21%)	6(3.16%)	71(37.37%)	190(4.6%)
	Curtain	2(7.41%)	12(44.44%)	0(0%)	14(51.85%)	0(0%)	14(51.85%)	27(0.65%)
	Hanger	0(0%)	0(0%)	0(0%)	0(0%)	0(0%)	0(0%)	1(0.02%)
	Tap water	1(2.5%)	2(5%)	0(0%)	2(5%)	0(0%)	2(5%)	40(0.97%)
	baby face mask	0(0%)	1(33.33%)	0(0%)	1(33.33%)	0(0%)	1(33.33%)	3(0.07%)
	door handle	0(0%)	13(32.5%)	1(2.5%)	12(30%)	1(2.5%)	12(30%)	40(0.97%)
	Couch	1(50%)	0(0%)	0(0%)	0(0%)	0(0%)	0(0%)	2(0.05%)
	ultrasound	2(18.18%)	5(45.45%)	0(0%)	8(72.73%)	0(0%)	8(72.73%)	11(0.27%)
	Medication corner	0(0%)	1(100%)	0(0%)	1(100%)	0(0%)	1(100%)	1(0.02%)
	Chair	1(20%)	1(20%)	0(0%)	1(20%)	0(0%)	1(20%)	5(0.12%)
	Safety box	1(50%)	1(50%)	0(0%)	2(100%)	0(0%)	2(100%)	2(0.05%)
	Table	2(2.6%)	19(24.68%)	0(0%)	22(28.57%)	0(0%)	22(28.57%)	77(1.87%)
	Phototherapy machine	16(26.23%)	19(31.15%)	6(9.84%)	32(52.46%)	2(3.28%)	36(59.02%)	61(1.48%)
	Wall	2(10%)	6(30%)	2(10%)	5(25%)	0(0%)	7(35%)	20(0.48%)
	Pulse oximetry	2(11.76%)	1(5.88%)	0(0%)	4(23.53%)	1(5.88%)	3(17.65%)	17(0.41%)
	Thermometer	2(11.11%)	4(22.22%)	0(0%)	5(27.78%)	0(0%)	5(27.78%)	18(0.44%)
	Oxygen cylinder	0(0%)	0(0%)	0(0%)	0(0%)	0(0%)	0(0%)	1(0.02%)
	Perfusion therapy	0(0%)	1(100%)	0(0%)	1(100%)	0(0%)	1(100%)	1(0.02%)
	Blood drawing table	0(0%)	0(0%)	0(0%)	0(0%)	0(0%)	0(0%)	4(0.1%)
	Cot	1(3.33%)	6(20%)	0(0%)	7(23.33%)	0(0%)	7(23.33%)	30(0.73%)
	Nurse's cup	2(100%)	0(0%)	0(0%)	2(100%)	0(0%)	2(100%)	2(0.05%)
	Syringes	2(15.38%)	0(0%)	0(0%)	4(30.77%)	0(0%)	4(30.77%)	13(0.32%)
	Incubator mattress	3(60%)	2(40%)	0(0%)	5(100%)	0(0%)	5(100%)	5(0.12%)
	Mother's Chair	2(100%)	0(0%)	0(0%)	2(100%)	0(0%)	2(100%)	2(0.05%)
	Medication table	1(100%)	0(0%)	0(0%)	1(100%)	0(0%)	1(100%)	1(0.02%)
	Oxygen Concentrator	2(33.33%)	2(33.33%)	0(0%)	5(83.33%)	0(0%)	5(83.33%)	6(0.15%)
	Medication cabinet	2(20%)	0(0%)	0(0%)	2(20%)	0(0%)	2(20%)	10(0.24%)
	Nurse's bucket	0(0%)	1(50%)	0(0%)	2(100%)	0(0%)	2(100%)	2(0.05%)
	Resuscitaire couch	1(100%)	0(0%)	0(0%)	1(100%)	0(0%)	1(100%)	1(0.02%)
	Fridge	2(50%)	0(0%)	0(0%)	2(50%)	0(0%)	2(50%)	4(0.1%)
	Resuscitaire	3(5.88%)	10(19.61%)	0(0%)	15(29.41%)	0(0%)	15(29.41%)	51(1.24%)
	Retort stand	1(100%)	0(0%)	0(0%)	1(100%)	0(0%)	1(100%)	1(0.02%)
	kidney dish	1(8.33%)	3(25%)	0(0%)	3(25%)	0(0%)	3(25%)	12(0.29%)
	Bed pan	0(0%)	1(11.11%)	0(0%)	2(22.22%)	0(0%)	2(22.22%)	9(0.22%)
	Suture material table	0(0%)	0(0%)	0(0%)	1(100%)	0(0%)	1(100%)	1(0.02%)
	Baby radiant warmer	2(50%)	0(0%)	1(25%)	2(50%)	0(0%)	3(75%)	4(0.1%)
	Examination bed	1(25%)	3(75%)	0(0%)	4(100%)	0(0%)	4(100%)	4(0.1%)
	cannula&catheter&prong&tubes	3(6.12%)	8(16.33%)	1(2.04%)	11(22.45%)	1(2.04%)	11(22.45%)	49(1.19%)
	Phototherapy switch	0(0%)	1(100%)	0(0%)	1(100%)	0(0%)	1(100%)	1(0.02%)
	Glucometer	0(0%)	2(33.33%)	0(0%)	2(33.33%)	0(0%)	2(33.33%)	6(0.15%)
	drug pounding mortar and pestle	1(100%)	0(0%)	1(100%)	0(0%)	0(0%)	1(100%)	1(0.02%)
	Measuring tape	1(5.26%)	1(5.26%)	0(0%)	2(10.53%)	0(0%)	2(10.53%)	19(0.46%)
	Suture bed	1(50%)	1(50%)	0(0%)	2(100%)	0(0%)	2(100%)	2(0.05%)
	Incubator bed	0(0%)	1(16.67%)	0(0%)	1(16.67%)	0(0%)	1(16.67%)	6(0.15%)
	Milk room tray	0(0%)	0(0%)	0(0%)	0(0%)	0(0%)	0(0%)	2(0.05%)
	Delivery mattress	0(0%)	0(0%)	0(0%)	0(0%)	0(0%)	0(0%)	1(0.02%)
	Sharps container	0(0%)	1(14.29%)	0(0%)	0(0%)	0(0%)	0(0%)	7(0.17%)
	delivery trolley	1(10%)	2(20%)	1(10%)	3(30%)	0(0%)	4(40%)	10(0.24%)
	Medication drawer	0(0%)	0(0%)	0(0%)	0(0%)	0(0%)	0(0%)	1(0.02%)
	Infant CVS monitor	0(0%)	0(0%)	0(0%)	0(0%)	0(0%)	0(0%)	1(0.02%)
	Bathing sink	7(21.88%)	6(18.75%)	1(3.13%)	10(31.25%)	1(3.13%)	10(31.25%)	32(0.78%)
	medication trolley	3(11.54%)	10(38.46%)	5(19.23%)	8(30.77%)	1(3.85%)	12(46.15%)	26(0.63%)
	handwash sink handle	3(16.67%)	6(33.33%)	1(5.56%)	6(33.33%)	0(0%)	7(38.89%)	18(0.44%)
	Mother's mattress	0(0%)	2(66.67%)	0(0%)	1(33.33%)	0(0%)	1(33.33%)	3(0.07%)
	Baby's mattress	0(0%)	4(30.77%)	1(7.69%)	0(0%)	0(0%)	1(7.69%)	13(0.32%)
	Delivery material set	0(0%)	2(66.67%)	0(0%)	2(66.67%)	0(0%)	2(66.67%)	3(0.07%)
	Lamp holder	0(0%)	0(0%)	0(0%)	0(0%)	0(0%)	0(0%)	1(0.02%)
	Oxygen tap	0(0%)	0(0%)	0(0%)	0(0%)	0(0%)	0(0%)	1(0.02%)
	Sample collection table	0(0%)	2(33.33%)	0(0%)	0(0%)	0(0%)	0(0%)	6(0.15%)
	hand sanitizer handle	0(0%)	0(0%)	0(0%)	0(0%)	0(0%)	0(0%)	2(0.05%)
	Toilet seat	0(0%)	0(0%)	0(0%)	0(0%)	0(0%)	0(0%)	2(0.05%)
	Resuscitaire mattress	0(0%)	0(0%)	0(0%)	0(0%)	0(0%)	0(0%)	5(0.12%)
	toilet door handle	0(0%)	0(0%)	0(0%)	0(0%)	0(0%)	0(0%)	1(0.02%)
	Cabinet	0(0%)	4(66.67%)	0(0%)	3(50%)	0(0%)	3(50%)	6(0.15%)
	Toilet's wall	0(0%)	1(50%)	0(0%)	1(50%)	0(0%)	1(50%)	2(0.05%)
	Oxygen inlet	0(0%)	0(0%)	0(0%)	0(0%)	0(0%)	0(0%)	2(0.05%)
	rest room door handle	0(0%)	1(100%)	0(0%)	1(100%)	0(0%)	1(100%)	1(0.02%)
	Mother's bed	0(0%)	2(18.18%)	0(0%)	4(36.36%)	0(0%)	4(36.36%)	11(0.27%)
	Resuscitaire bed	0(0%)	7(38.89%)	0(0%)	5(27.78%)	0(0%)	5(27.78%)	18(0.44%)
	Drug box	0(0%)	1(8.33%)	0(0%)	1(8.33%)	0(0%)	1(8.33%)	12(0.29%)
	Infant radiant warmer	2(16.67%)	1(8.33%)	0(0%)	2(16.67%)	0(0%)	2(16.67%)	12(0.29%)
	Sterile obstetrics forceps & speculum	0(0%)	4(40%)	0(0%)	4(40%)	0(0%)	4(40%)	10(0.24%)
	Bed step	1(14.29%)	3(42.86%)	0(0%)	6(85.71%)	0(0%)	6(85.71%)	7(0.17%)
	Oxygen connector	0(0%)	0(0%)	0(0%)	0(0%)	0(0%)	0(0%)	1(0.02%)
	Obstetric equipment table	0(0%)	0(0%)	0(0%)	0(0%)	0(0%)	0(0%)	1(0.02%)
	Oxygen machine	0(0%)	2(66.67%)	0(0%)	2(66.67%)	0(0%)	2(66.67%)	3(0.07%)
	Mother's overall	1(25%)	0(0%)	1(25%)	0(0%)	0(0%)	1(25%)	4(0.1%)
	Baby's bed	2(14.29%)	6(42.86%)	1(7.14%)	5(35.71%)	0(0%)	6(42.86%)	14(0.34%)
	Baby incubator	2(8.7%)	4(17.39%)	0(0%)	4(17.39%)	0(0%)	4(17.39%)	23(0.56%)
	Nurses' station desk	0(0%)	0(0%)	0(0%)	1(50%)	0(0%)	1(50%)	2(0.05%)
	Lamp stand	0(0%)	0(0%)	0(0%)	0(0%)	0(0%)	0(0%)	1(0.02%)
	Delivery bed	1(9.09%)	4(36.36%)	1(9.09%)	4(36.36%)	1(9.09%)	4(36.36%)	11(0.27%)
	Baby resuscitaire	1(16.67%)	2(33.33%)	0(0%)	3(50%)	0(0%)	3(50%)	6(0.15%)
	Window	1(12.5%)	1(12.5%)	0(0%)	3(37.5%)	0(0%)	3(37.5%)	8(0.19%)
	Oxygen valve	0(0%)	0(0%)	0(0%)	0(0%)	0(0%)	0(0%)	1(0.02%)
	Breast milk cup	3(20%)	1(6.67%)	0(0%)	3(20%)	0(0%)	3(20%)	15(0.36%)
	Fluorescent light	0(0%)	0(0%)	0(0%)	0(0%)	0(0%)	0(0%)	1(0.02%)
	Feeding cup	0(0%)	3(42.86%)	0(0%)	4(57.14%)	0(0%)	4(57.14%)	7(0.17%)
	Radiotherapy light	1(33.33%)	0(0%)	0(0%)	1(33.33%)	0(0%)	1(33.33%)	3(0.07%)
	Probe	0(0%)	1(33.33%)	0(0%)	1(33.33%)	0(0%)	1(33.33%)	3(0.07%)
	Tourniquet	0(0%)	1(33.33%)	0(0%)	1(33.33%)	0(0%)	1(33.33%)	3(0.07%)
	Vital signs monitor	3(21.43%)	2(14.29%)	1(7.14%)	5(35.71%)	0(0%)	6(42.86%)	14(0.34%)
	Breast milk container	0(0%)	1(50%)	0(0%)	1(50%)	0(0%)	1(50%)	2(0.05%)
	Baby's cloth	0(0%)	1(50%)	0(0%)	1(50%)	0(0%)	1(50%)	2(0.05%)
	Drug fridge	0(0%)	1(25%)	0(0%)	1(25%)	0(0%)	1(25%)	4(0.1%)
	Cardiac event monitor	1(16.67%)	3(50%)	0(0%)	5(83.33%)	0(0%)	5(83.33%)	6(0.15%)
	Matron's scrub	1(100%)	0(0%)	0(0%)	1(100%)	1(100%)	0(0%)	1(0.02%)
	Physiotherapy light	0(0%)	0(0%)	0(0%)	0(0%)	0(0%)	0(0%)	2(0.05%)
	Breast milk bowl	0(0%)	0(0%)	0(0%)	0(0%)	0(0%)	0(0%)	1(0.02%)
	Mother's scrobe	0(0%)	1(50%)	0(0%)	1(50%)	0(0%)	1(50%)	2(0.05%)
	accu-Chek instrument	0(0%)	0(0%)	0(0%)	0(0%)	0(0%)	0(0%)	1(0.02%)
	Injections fridge	0(0%)	1(50%)	0(0%)	0(0%)	0(0%)	0(0%)	2(0.05%)
	Blood samples fridge	0(0%)	0(0%)	0(0%)	0(0%)	0(0%)	0(0%)	2(0.05%)
	Surgical material	0(0%)	0(0%)	0(0%)	0(0%)	0(0%)	0(0%)	1(0.02%)
	Samples fridge	0(0%)	0(0%)	0(0%)	0(0%)	0(0%)	0(0%)	1(0.02%)
	Neonatal respiratory monitor	0(0%)	0(0%)	0(0%)	0(0%)	0(0%)	0(0%)	1(0.02%)
	Vaccine fridge	0(0%)	1(50%)	0(0%)	1(50%)	0(0%)	1(50%)	2(0.05%)
	Phototherapy light	0(0%)	1(8.33%)	0(0%)	3(25%)	0(0%)	3(25%)	12(0.29%)
	Baby pamper	0(0%)	0(0%)	0(0%)	1(14.29%)	0(0%)	1(14.29%)	7(0.17%)
	emergency tray	0(0%)	0(0%)	0(0%)	0(0%)	0(0%)	0(0%)	2(0.05%)
	drug tray	0(0%)	1(100%)	0(0%)	0(0%)	0(0%)	0(0%)	1(0.02%)
	Jaundice screening probe&accessories	0(0%)	0(0%)	0(0%)	0(0%)	0(0%)	0(0%)	3(0.07%)
	Amoxy clavulanic injection bottle	0(0%)	0(0%)	0(0%)	0(0%)	0(0%)	0(0%)	1(0.02%)
	emergency trolley	0(0%)	2(66.67%)	0(0%)	0(0%)	0(0%)	0(0%)	3(0.07%)
	Oxygen inhalation mask	0(0%)	0(0%)	0(0%)	0(0%)	0(0%)	0(0%)	4(0.1%)
	Bed's cover	0(0%)	1(100%)	0(0%)	0(0%)	0(0%)	0(0%)	1(0.02%)
	Mother's delivery bed	2(4.08%)	7(14.29%)	0(0%)	7(14.29%)	0(0%)	7(14.29%)	49(1.19%)
	Oxygen container	0(0%)	1(20%)	0(0%)	1(20%)	0(0%)	1(20%)	5(0.12%)
	Oxygen stand	0(0%)	1(100%)	0(0%)	1(100%)	0(0%)	1(100%)	1(0.02%)
	Baby resuscitator	4(12.5%)	2(6.25%)	0(0%)	4(12.5%)	0(0%)	4(12.5%)	32(0.78%)
	Baby's bathing table	1(16.67%)	1(16.67%)	0(0%)	1(16.67%)	0(0%)	1(16.67%)	6(0.15%)
	Baby's dressing table	4(33.33%)	3(25%)	0(0%)	4(33.33%)	0(0%)	4(33.33%)	12(0.29%)
	Mother's drawer	0(0%)	0(0%)	0(0%)	0(0%)	0(0%)	0(0%)	1(0.02%)
	Baby measuring tape	0(0%)	3(37.5%)	0(0%)	3(37.5%)	0(0%)	3(37.5%)	8(0.19%)
	Baby resuscitaire bed	0(0%)	0(0%)	0(0%)	0(0%)	0(0%)	0(0%)	5(0.12%)
	Baby's locker	0(0%)	1(12.5%)	0(0%)	2(25%)	0(0%)	2(25%)	8(0.19%)
	Baby's couch	1(25%)	1(25%)	0(0%)	2(50%)	0(0%)	2(50%)	4(0.1%)
	Mother's locker	5(35.71%)	1(7.14%)	0(0%)	3(21.43%)	0(0%)	3(21.43%)	14(0.34%)
	Mother's dressing table	1(100%)	0(0%)	0(0%)	1(100%)	0(0%)	1(100%)	1(0.02%)
	Phototherapy bed	0(0%)	0(0%)	0(0%)	0(0%)	0(0%)	0(0%)	1(0.02%)
	Mother resuscitaire bed	0(0%)	0(0%)	0(0%)	0(0%)	0(0%)	0(0%)	1(0.02%)
	Mother's ultrasound probe	0(0%)	0(0%)	0(0%)	0(0%)	0(0%)	0(0%)	1(0.02%)
	PANS equipment	0(0%)	0(0%)	0(0%)	0(0%)	0(0%)	0(0%)	3(0.07%)
	Mother's sink	0(0%)	0(0%)	0(0%)	1(50%)	0(0%)	1(50%)	2(0.05%)
	Baby's cabinet	0(0%)	1(100%)	0(0%)	1(100%)	0(0%)	1(100%)	1(0.02%)
	Measuring table	1(100%)	0(0%)	0(0%)	0(0%)	0(0%)	0(0%)	1(0.02%)
	Nurses' station table	0(0%)	1(50%)	0(0%)	2(100%)	0(0%)	2(100%)	2(0.05%)
	fridge handle	0(0%)	0(0%)	0(0%)	0(0%)	0(0%)	0(0%)	1(0.02%)
	Patient's locker	0(0%)	0(0%)	0(0%)	0(0%)	0(0%)	0(0%)	1(0.02%)
	Resuscitator	0(0%)	0(0%)	0(0%)	0(0%)	0(0%)	0(0%)	1(0.02%)
	Delivery table	6(12.5%)	17(35.42%)	5(10.42%)	18(37.5%)	2(4.17%)	21(43.75%)	48(1.16%)
	Vacuum pump	0(0%)	0(0%)	0(0%)	0(0%)	0(0%)	0(0%)	1(0.02%)
	Locker	3(6.82%)	13(29.55%)	0(0%)	20(45.45%)	0(0%)	20(45.45%)	44(1.07%)
	Food container	0(0%)	0(0%)	0(0%)	0(0%)	0(0%)	0(0%)	1(0.02%)
	Steriliser	0(0%)	1(100%)	0(0%)	0(0%)	0(0%)	0(0%)	1(0.02%)
	Mother's gown	5(14.71%)	9(26.47%)	6(17.65%)	8(23.53%)	2(5.88%)	12(35.29%)	34(0.82%)
	Headbox device	9(19.15%)	14(29.79%)	3(6.38%)	19(40.43%)	1(2.13%)	21(44.68%)	47(1.14%)
	Ventilator	3(21.43%)	6(42.86%)	2(14.29%)	8(57.14%)	1(7.14%)	9(64.29%)	14(0.34%)
	Patient's Hand	1(25%)	2(50%)	1(25%)	2(50%)	1(25%)	2(50%)	4(0.1%)
	Doctor's table	4(25%)	4(25%)	3(18.75%)	6(37.5%)	1(6.25%)	8(50%)	16(0.39%)
	Infusion pump	5(14.71%)	15(44.12%)	5(14.71%)	15(44.12%)	0(0%)	20(58.82%)	34(0.82%)
	Baby Matrix	8(23.53%)	11(32.35%)	8(23.53%)	14(41.18%)	2(5.88%)	20(58.82%)	34(0.82%)
	Nebulizer	0(0%)	3(100%)	1(33.33%)	2(66.67%)	0(0%)	3(100%)	3(0.07%)
	injection rack	0(0%)	0(0%)	0(0%)	0(0%)	0(0%)	0(0%)	1(0.02%)
	Pulse monitor	0(0%)	2(25%)	0(0%)	5(62.5%)	0(0%)	5(62.5%)	8(0.19%)
	Doctor's counter	0(0%)	4(66.67%)	1(16.67%)	3(50%)	0(0%)	4(66.67%)	6(0.15%)
	Working table	7(33.33%)	5(23.81%)	0(0%)	14(66.67%)	0(0%)	14(66.67%)	21(0.51%)
	nurse's hand	1(5.88%)	5(29.41%)	1(5.88%)	4(23.53%)	1(5.88%)	4(23.53%)	17(0.41%)
	Sanatory worker's Hand	0(0%)	1(33.33%)	0(0%)	1(33.33%)	0(0%)	1(33.33%)	3(0.07%)
	Doctor's Hand	2(13.33%)	4(26.67%)	1(6.67%)	5(33.33%)	0(0%)	6(40%)	15(0.36%)
	laryngoscope	0(0%)	1(33.33%)	0(0%)	1(33.33%)	0(0%)	1(33.33%)	3(0.07%)
	Door	2(20%)	1(10%)	0(0%)	4(40%)	0(0%)	4(40%)	10(0.24%)
	delivery tray	0(0%)	1(100%)	0(0%)	1(100%)	0(0%)	1(100%)	1(0.02%)
	Operation Theater light	2(16.67%)	2(16.67%)	1(8.33%)	4(33.33%)	0(0%)	5(41.67%)	12(0.29%)
	Nurses' working table	0(0%)	0(0%)	0(0%)	0(0%)	0(0%)	0(0%)	1(0.02%)
	Switches	0(0%)	0(0%)	0(0%)	0(0%)	0(0%)	0(0%)	1(0.02%)
	Oxygen Pump	0(0%)	0(0%)	0(0%)	1(50%)	0(0%)	1(50%)	2(0.05%)
	Worker's Hand	0(0%)	0(0%)	0(0%)	0(0%)	0(0%)	0(0%)	2(0.05%)
	Table's cover	3(20%)	5(33.33%)	0(0%)	6(40%)	0(0%)	6(40%)	15(0.36%)
	Kandagira ukarabe ("step and wash")	7(53.85%)	3(23.08%)	0(0%)	11(84.62%)	0(0%)	11(84.62%)	13(0.32%)
	Echography Machine	2(66.67%)	0(0%)	0(0%)	0(0%)	0(0%)	0(0%)	3(0.07%)
	Bottle of soap	0(0%)	1(100%)	0(0%)	1(100%)	0(0%)	1(100%)	1(0.02%)
	Mother's bag	0(0%)	0(0%)	0(0%)	0(0%)	0(0%)	0(0%)	1(0.02%)
	Lamp	0(0%)	0(0%)	0(0%)	0(0%)	0(0%)	0(0%)	7(0.17%)
	Cupboard	2(11.11%)	1(5.56%)	0(0%)	5(27.78%)	0(0%)	5(27.78%)	18(0.44%)
	Examination table	0(0%)	0(0%)	0(0%)	1(50%)	0(0%)	1(50%)	2(0.05%)
	Baby radiant warmer mattress	1(100%)	0(0%)	0(0%)	1(100%)	0(0%)	1(100%)	1(0.02%)
	Bedsheet	2(33.33%)	2(33.33%)	0(0%)	4(66.67%)	0(0%)	4(66.67%)	6(0.15%)
	Mother's hand	3(27.27%)	3(27.27%)	0(0%)	5(45.45%)	0(0%)	5(45.45%)	11(0.27%)
	Oxygen cable	0(0%)	0(0%)	0(0%)	0(0%)	0(0%)	0(0%)	3(0.07%)
	Gynecological table	3(15.79%)	5(26.32%)	0(0%)	5(26.32%)	0(0%)	5(26.32%)	19(0.46%)
	Radiant warmer mattress	2(25%)	1(12.5%)	0(0%)	2(25%)	0(0%)	2(25%)	8(0.19%)
	Oxygen regulator	0(0%)	1(100%)	0(0%)	1(100%)	0(0%)	1(100%)	1(0.02%)
	Radiant warmer bedsheet	0(0%)	3(42.86%)	0(0%)	3(42.86%)	0(0%)	3(42.86%)	7(0.17%)
	Aspirator	2(28.57%)	2(28.57%)	0(0%)	3(42.86%)	0(0%)	3(42.86%)	7(0.17%)
	cleaner's hand	1(100%)	0(0%)	0(0%)	1(100%)	0(0%)	1(100%)	1(0.02%)
	clinician's hand	0(0%)	0(0%)	0(0%)	0(0%)	0(0%)	0(0%)	1(0.02%)
	Mother's bedsheet	0(0%)	1(100%)	0(0%)	1(100%)	0(0%)	1(100%)	1(0.02%)
	Incubator bedsheet	3(50%)	1(16.67%)	1(16.67%)	3(50%)	0(0%)	4(66.67%)	6(0.15%)
	Oxygen holder	0(0%)	1(7.14%)	0(0%)	1(7.14%)	0(0%)	1(7.14%)	14(0.34%)
	Grandmother's hand	1(100%)	0(0%)	0(0%)	1(100%)	0(0%)	1(100%)	1(0.02%)
	Monitor	8(25%)	10(31.25%)	2(6.25%)	11(34.38%)	0(0%)	13(40.63%)	32(0.78%)
	student's hand	1(50%)	0(0%)	0(0%)	2(100%)	0(0%)	2(100%)	2(0.05%)
	Cup	1(50%)	1(50%)	0(0%)	1(50%)	0(0%)	1(50%)	2(0.05%)
	Baby guardian's hand	1(100%)	0(0%)	0(0%)	1(100%)	0(0%)	1(100%)	1(0.02%)
	Baby cup	0(0%)	0(0%)	0(0%)	0(0%)	0(0%)	0(0%)	1(0.02%)
	Sciatic lamp	0(0%)	0(0%)	0(0%)	0(0%)	0(0%)	0(0%)	1(0.02%)
	Gynecological table's mattress	0(0%)	1(100%)	0(0%)	0(0%)	0(0%)	0(0%)	1(0.02%)
	Radiant warmer's curtains	0(0%)	0(0%)	0(0%)	0(0%)	0(0%)	0(0%)	1(0.02%)
	Gynecological lamp	0(0%)	1(20%)	0(0%)	1(20%)	0(0%)	1(20%)	5(0.12%)
	Oxygen grasses	0(0%)	0(0%)	0(0%)	0(0%)	0(0%)	0(0%)	1(0.02%)
	Anesthesia machine	0(0%)	0(0%)	0(0%)	0(0%)	0(0%)	0(0%)	1(0.02%)
	Mother's prone	1(100%)	0(0%)	0(0%)	1(100%)	0(0%)	1(100%)	1(0.02%)
	Radiant warmer's lamp	0(0%)	1(50%)	0(0%)	1(50%)	0(0%)	1(50%)	2(0.05%)
	Infant radiant warmer mattress	0(0%)	1(50%)	1(50%)	0(0%)	0(0%)	1(50%)	2(0.05%)
	Mother's shoe	1(100%)	0(0%)	1(100%)	0(0%)	0(0%)	1(100%)	1(0.02%)
	Cooker	0(0%)	0(0%)	0(0%)	0(0%)	0(0%)	0(0%)	1(0.02%)
	Cleaner's Shoe	1(100%)	0(0%)	0(0%)	1(100%)	0(0%)	1(100%)	1(0.02%)
	Radiant warmer's support holder	0(0%)	0(0%)	0(0%)	0(0%)	0(0%)	0(0%)	1(0.02%)
	Mother's cup	0(0%)	1(100%)	0(0%)	1(100%)	0(0%)	1(100%)	1(0.02%)
	Bench	1(33.33%)	0(0%)	0(0%)	1(33.33%)	0(0%)	1(33.33%)	3(0.07%)
	Saucepan	0(0%)	0(0%)	0(0%)	0(0%)	0(0%)	0(0%)	1(0.02%)
	Basket's holder	2(66.67%)	1(33.33%)	0(0%)	3(100%)	0(0%)	3(100%)	3(0.07%)
	Radiant warmer's incubator	2(100%)	0(0%)	0(0%)	2(100%)	0(0%)	2(100%)	2(0.05%)
	Basket's cover	1(33.33%)	1(33.33%)	0(0%)	2(66.67%)	0(0%)	2(66.67%)	3(0.07%)
	Computer's table	0(0%)	0(0%)	0(0%)	0(0%)	0(0%)	0(0%)	1(0.02%)
	Jar	0(0%)	1(100%)	0(0%)	1(100%)	0(0%)	1(100%)	1(0.02%)
	Telescope	0(0%)	0(0%)	0(0%)	0(0%)	0(0%)	0(0%)	1(0.02%)
	Duracell	0(0%)	0(0%)	0(0%)	0(0%)	0(0%)	0(0%)	1(0.02%)
	CPAP therapy and accessories	2(10.53%)	1(5.26%)	0(0%)	3(15.79%)	0(0%)	3(15.79%)	19(0.46%)
	Phototherapy lamp	0(0%)	0(0%)	0(0%)	0(0%)	0(0%)	0(0%)	9(0.22%)
	Vacuum gauge	0(0%)	1(50%)	0(0%)	2(100%)	1(50%)	1(50%)	2(0.05%)
	Fire extinguisher	0(0%)	0(0%)	0(0%)	0(0%)	0(0%)	0(0%)	1(0.02%)
	Multicharge	0(0%)	0(0%)	0(0%)	0(0%)	0(0%)	0(0%)	1(0.02%)
	Vaporizer	0(0%)	0(0%)	0(0%)	0(0%)	0(0%)	0(0%)	1(0.02%)
	baby hat	0(0%)	0(0%)	0(0%)	0(0%)	0(0%)	0(0%)	2(0.05%)
	materials' carrier	0(0%)	0(0%)	0(0%)	0(0%)	0(0%)	0(0%)	1(0.02%)
	Glass	0(0%)	1(33.33%)	0(0%)	1(33.33%)	0(0%)	1(33.33%)	3(0.07%)
	Bed headboard	0(0%)	0(0%)	0(0%)	0(0%)	0(0%)	0(0%)	3(0.07%)
	Pillow's cover	0(0%)	1(25%)	0(0%)	0(0%)	0(0%)	0(0%)	4(0.1%)
	Electrical plugs	0(0%)	0(0%)	0(0%)	0(0%)	0(0%)	0(0%)	1(0.02%)
	floor under basin tap	0(0%)	0(0%)	0(0%)	0(0%)	0(0%)	0(0%)	1(0.02%)
	Patient's table	0(0%)	1(33.33%)	0(0%)	1(33.33%)	0(0%)	1(33.33%)	3(0.07%)
	Mattress' cover	1(33.33%)	0(0%)	0(0%)	1(33.33%)	0(0%)	1(33.33%)	3(0.07%)
	Food cover	0(0%)	0(0%)	0(0%)	1(100%)	0(0%)	1(100%)	1(0.02%)
	Puritone bottle	0(0%)	0(0%)	0(0%)	2(25%)	0(0%)	2(25%)	8(0.19%)
	Paper towel	0(0%)	0(0%)	0(0%)	0(0%)	0(0%)	0(0%)	1(0.02%)
	milk kitchen basin	0(0%)	0(0%)	0(0%)	0(0%)	0(0%)	0(0%)	1(0.02%)
	Wedding ring finger	1(100%)	0(0%)	0(0%)	1(100%)	0(0%)	1(100%)	1(0.02%)
	Pillow	0(0%)	0(0%)	0(0%)	1(33.33%)	0(0%)	1(33.33%)	3(0.07%)
	spilled breast milk	0(0%)	1(100%)	0(0%)	1(100%)	0(0%)	1(100%)	1(0.02%)
	baby tag	0(0%)	0(0%)	0(0%)	0(0%)	0(0%)	0(0%)	3(0.07%)
	Breast milk bottle	0(0%)	0(0%)	0(0%)	1(20%)	0(0%)	1(20%)	5(0.12%)
	Oxygen line	0(0%)	0(0%)	0(0%)	0(0%)	0(0%)	0(0%)	1(0.02%)
	Phototherapy goggles	0(0%)	0(0%)	0(0%)	0(0%)	0(0%)	0(0%)	1(0.02%)
	Drain	0(0%)	1(100%)	0(0%)	0(0%)	0(0%)	0(0%)	1(0.02%)
	Water jug	0(0%)	1(33.33%)	0(0%)	1(33.33%)	0(0%)	1(33.33%)	3(0.07%)
	Bin	0(0%)	1(50%)	0(0%)	1(50%)	0(0%)	1(50%)	2(0.05%)
	Oxygen bottle	0(0%)	1(25%)	0(0%)	1(25%)	0(0%)	1(25%)	4(0.1%)
	Air conditioner vent	0(0%)	1(50%)	0(0%)	1(50%)	0(0%)	1(50%)	2(0.05%)
	toilet floor	1(100%)	0(0%)	0(0%)	1(100%)	1(100%)	0(0%)	1(0.02%)
	Bed's Indication board	0(0%)	0(0%)	0(0%)	0(0%)	0(0%)	0(0%)	1(0.02%)
	Oxygen flow meter	0(0%)	0(0%)	0(0%)	1(16.67%)	0(0%)	1(16.67%)	6(0.15%)
	Bedside radio	0(0%)	0(0%)	0(0%)	0(0%)	0(0%)	0(0%)	2(0.05%)
	Bedbell	0(0%)	0(0%)	0(0%)	0(0%)	0(0%)	0(0%)	2(0.05%)
	Pulse oximetry monitor	0(0%)	0(0%)	0(0%)	1(100%)	0(0%)	1(100%)	1(0.02%)
	Hand towel dispenser	0(0%)	0(0%)	0(0%)	0(0%)	0(0%)	0(0%)	2(0.05%)
	Blinds	0(0%)	0(0%)	0(0%)	0(0%)	0(0%)	0(0%)	1(0.02%)
	Oxygen pipe	0(0%)	0(0%)	0(0%)	0(0%)	0(0%)	0(0%)	1(0.02%)
	CPAP monitor	0(0%)	0(0%)	0(0%)	0(0%)	0(0%)	0(0%)	1(0.02%)
	Oxygen probe	1(50%)	0(0%)	0(0%)	1(50%)	0(0%)	1(50%)	2(0.05%)
	Radio caller	0(0%)	0(0%)	0(0%)	0(0%)	0(0%)	0(0%)	1(0.02%)
	Cotsheet	0(0%)	0(0%)	0(0%)	0(0%)	0(0%)	0(0%)	1(0.02%)
	Total positive and negative samples per ARG (over 4,126)	601(14.57%)	1,205(29.21%)	191(4.63%)	1,664(40.33%)	53(1.28%)	1,802(43.67%)	4,126(100%)
	Missing data for samples (over 6,290)	238(11%)		147(6.79%)		21(0.97%)		2164
