# Supplementary material for: Colonisation of extended spectrum β-lactamase- and carbapenemase-producing bacteria on hospital surfaces from low-/middle-income countries
Source: Research Square preprint supplement (doi:10.21203/rs.3.rs-3209071/v1), 2023-08-04
Supplement: Supplementary file 6 [file 52a41b197a685b83b163552a.xlsx]

## Sheet: 6 surface categories
Supplementary material. Colonisation of extended spectrum β-lactamase- and carbapenemase-producing bacteria on hospital surfaces from low-/middle-income countries
Table S8. Classification of 309 different individual surfaces into six different surface categories, based on the WHO Infection Prevention and Control (IPC) guidelines and previous publications. Six surface categories are shown as well as the individual surfaces included in each category. The number of hospital surface swabs (HSS) collected per each type of individual surface is shown.
	Six surface categories
	Patient's zone	n of HSS	Sinks and water system	n of HSS	Emergency neonatal care	n of HSS	Mobile medical equipment	n of HSS	Ward furniture/surfaces	n of HSS	Medical equipment	n of HSS
Individual surfaces included in each surface category	Baby's table	89	Basin	243	Incubator	334	tray	7	Seat	26	stethoscope and sphygmomanometer	95
	Baby's corner	16	Sink	108	Incubator mattress	5	suction tube	24	Dustbin	25	Ambu bag (bag valve mask) and accessories	37
	Baby's mattress	13	Bathing sink	32	Incubator bed	6	kidney tray	30	Gynecologist seat	2	intravenous (IV) line and accessories	237
	Baby's cloth	2	Kandagira ukarabe ("step and wash")	13	Baby incubator	23	baby tray	9	Basket	35	Fetoscope	2
	Baby's bathing table	6	milk kitchen basin	1	Incubator bedsheet	6	suction bottle	30	Labour table	66	ultrasound	11
	Baby's dressing table	12	handwash sink handle	18	Labour room baby radiant warmer seat	1	suction bulb	45	Dressing table	1	Pulse oximetry	17
	Baby's couch	4	Tap water	40	Radiant warmer seat	7	baby tube	6	Wheelchair	3	Thermometer	18
	Baby's cabinet	1	Hand towel dispenser	2	Radiant warmer's water	1	medical suction machine	25	Mattress	34	Perfusion therapy	1
	Patient's Hand	4	Paper towel	1	Radiant warmer	190	Trolley	66	Delivery couch	47	Syringes	13
	Baby Matrix	34	Bottle of soap	1	Resuscitaire couch	1	medication tray	4	Delivery sheet	1	Medication cabinet	10
	Baby pamper	7			Resuscitaire	51	baby face mask	3	Mobile light stand	1	Fridge	4
	baby tag	3			Baby radiant warmer	4	delivery trolley	10	Curtain	27	Retort stand	1
	baby hat	2			Resuscitaire mattress	5	medication trolley	26	Hanger	1	kidney dish	12
	Mother's Chair	2			Resuscitaire bed	18	emergency tray	2	Couch	2	cannula,catheter,prong,tubes	49
	Mother's mattress	3			Infant radiant warmer	12	drug tray	1	Medication corner	1	Glucometer	6
	Mother's overall	4			Baby resuscitaire	6	emergency trolley	3	Chair	5	drug pounding mortar and pestle	1
	Mother's scrobe	2			Baby resuscitator	32	Vacuum pump	1	Safety box	2	Delivery material set	3
	Mother's drawer	1			Baby resuscitaire bed	5	injection rack	1	Table	77	Sterile obstetrics forceps and speculum	10
	Mother's dressing table	1			Mother resuscitaire bed	1	delivery tray	1	Wall	20	Probe	3
	Mother's ultrasound probe	1			Resuscitator	1	Aspirator	7	Blood drawing table	4	Tourniquet	3
	Mother's sink	2			Baby radiant warmer mattress	1	materials' carrier	1	Medication table	1	Drug fridge	4
	Mother's gown	34			Radiant warmer mattress	8	Cardiotocography monitor	13	Suture material table	1	Physiotherapy light	2
	Mother's bag	1			Radiant warmer bedsheet	7	Infant CVS monitor	1	Fluorescent light	1	Injections fridge	2
	Mother's hand	11			Radiant warmer's curtains	1	Vital signs monitor	14	Baby's locker	8	Blood samples fridge	2
	Grandmother's hand	1			Radiant warmer's lamp	2	Cardiac event monitor	6	Mother's locker	14	Surgical material	1
	Mother's prone	1			Infant radiant warmer mattress	2	accu-Chek instrument	1	Patient's locker	1	Samples fridge	1
	Mother's shoe	1			Radiant warmer's support holder	1	Neonatal respiratory monitor	1	Delivery table	48	Vaccine fridge	2
	Mother's cup	1			Radiant warmer's incubator	2	Pulse monitor	8	Locker	44	Jaundice screening probe/accessories	3
	Wedding ring finger	1					Monitor	32	Working table	21	Amoxy clavulanic injection bottle	1
	Baby's bed	14					Pulse oximetry monitor	1	Door	10	Bed pan	9
	Mother's bed	11					CPAP monitor	1	Switches	1	Oxygen inhalation mask	4
	Mother's delivery bed	49					Oxygen cannola	7	Table's cover	15	PANS equipment	3
	Mother's bedsheet	1					oxygen mask	71	Lamp	7	Steriliser	1
	Bed	49					Oxygen tube	32	Cupboard	18	Headbox device	47
	Bed screen	2					Oxygen gauge	1	Examination table	2	Ventilator	14
	Bed linen	1					Oxygen cylinder	1	Gynecological table	19	Infusion pump	34
	Examination bed	4					Oxygen Concentrator	6	Gynecological table's mattress	1	Nebulizer	3
	Bed's cover	1					Oxygen tap	1	Gynecological lamp	5	laryngoscope	3
	Pillow	3					Oxygen inlet	2	Bench	3	Operation Theater light	12
	Bed headboard	3					Oxygen connector	1	Basket's holder	3	Echography Machine	3
	Pillow's cover	4					Oxygen machine	3	Basket's cover	3	Sciatic lamp	1
	Bedsheet	6					Oxygen valve	1	Computer's table	1	Anesthesia machine	1
	Cot	30					Oxygen container	5	Electrical plugs	1	Telescope	1
	Suture bed	2					Oxygen stand	1	Patient's table	3	CPAP therapy and accessories	19
	Bed step	7					Oxygen Pump	2	Mattress' cover	3	Vacuum gauge	2
	Delivery bed	11					Oxygen cable	3	Sharps container	7	Vaporizer	1
	Bed's Indication board	1					Oxygen regulator	1	Medication drawer	1	Puritone bottle	8
	Bedbell	2					Oxygen holder	14	Lamp holder	1	Drain	1
	Cotsheet	1					Oxygen grasses	1	Sample collection table	6	Phototherapy machine	61
	Baby's cot	51					Oxygen line	1	Toilet seat	2	Phototherapy switch	1
	Nurse's cup	2					Oxygen bottle	4	Cabinet	6	Radiotherapy light	3
	Nurse's bucket	2					Oxygen flow meter	6	Toilet's wall	2	Phototherapy light	12
	Nurses' station desk	2					Oxygen pipe	1	Drug box	12	Phototherapy bed	1
	Matron's scrub	1					Oxygen probe	2	Obstetric equipment table	1	Phototherapy lamp	9
	Nurses' station table	2							Lamp stand	1	Phototherapy goggles	1
	Doctor's table	16							Window	8
	Doctor's counter	6							Delivery mattress	1
	nurse's hand	17							Bin	2
	Sanatory worker's Hand	3							Blinds	1
	Doctor's Hand	15							door handle	40
	Nurses' working table	1							hand sanitizer handle	2
	Worker's Hand	2							toilet door handle	1
	cleaner's hand	1							rest room door handle	1
	clinician's hand	1							fridge handle	1
	student's hand	2							floor	35
	Baby guardian's hand	1							neonatal floor	1
	Cleaner's Shoe	1							floor under basin tap	1
	Feeding cup	7							toilet floor	1
	Food container	1							Duracell	1
	Cup	2							Fire extinguisher	1
	Baby cup	1							Multicharge	1
	Cooker	1							Air conditioner vent	2
	Saucepan	1							Bedside radio	2
	Jar	1							Radio caller	1
	Glass	3
	Food cover	1
	Water jug	3
	Milk room tray	2
	Breast milk cup	15
	Breast milk container	2
	Breast milk bowl	1
	spilled breast milk	1
	Breast milk bottle	5
	Baby weighing scale	53
	weighing scale	109
	Measuring tape	19
	Baby measuring tape	8
	Measuring table	1
Total (309 types of surfaces): 4,126 HSS	88 types of surfaces included	825	10 types of surfaces included	459	28 types of surfaces included	733	54 types of surfaces included	547	74 types of surfaces included	756	55 types of surfaces included	806
