# Supplementary material for: Colonisation of extended spectrum β-lactamase- and carbapenemase-producing bacteria on hospital surfaces from low-/middle-income countries
Source: Research Square preprint supplement (doi:10.21203/rs.3.rs-3209071/v1), 2023-08-04
Supplement: Supplementary file 7 [file cc1be8a27e1c57056d2d8687.xlsx]

## Sheet: Sheet1
	Supplementary material. Colonisation of extended spectrum β-lactamase- and carbapenemase-producing bacteria on hospital surfaces from low-/middle-income countries
	Table S6. Sequence types (ST) for the most commonly WGS identified species with a recognized multilocus sequence typing (MLST) scheme. The antimicrobial resistance gene (ARG) variables and their location in the chromosome and/or plasmid are also shown, as well as the plasmid type, if located in a plasmid. Numbers of isolates characterized (a) and identified per each hospital site (b) are shown. C…
	Species		Isolates characterised by WGS (a)	Number identified per hospital site (b)	Number of STs found	Prominent STs	STs predominantly found in specific hospital sites	Timeline (STs predominantly found) (c)	Hospital surface (STs predominantly found) (d)	ARG variables (STs predominantly found)	ARGs found in chromosome or plasmid	Plasmid type harbouring ARGs
	A. baumannii complex	A. baumannii	9	RU (n=5), NK (n=2), NN (n=1), ZAT (n=1)	5	ST52	ST52 (RU=3, ZAT=1)	September 2016 (n=2, RU), July 2017 (n=1 RU), NA (ZAT=1)	Emergency Neonatal Care (n=1), Mobile Medical Equipment (n=1), Ward Furniture/Surfaces (n=1), NA (n=1, ZAT)	blaNDM-1	Chromosome (n=2), unknown (n=2)	NA
		A. nosocomialis	1	BC (n=1)	1	ST68	NA	June 2017	Ward Furniture/Surfaces (n=1)	blaNDM-1	Unknown	NA
	E. coli		2	PP (n=2)	2	ST405, ST448	ST405 (n=1)	January 2017	Emergency Neonatal Care	blaNDM-1, blaOXA-181	Plasmid	IncA/C (blaNDM-1), IncX3/ColKP3 (blaOXA-181)
	E. cloacae complex	E. asburiae	2	RU (n=2)	1	ST733	ST733	July 2017	Ward Furniture/Surfaces (n=1), Mobile Medical Equipment (n=1)	blaOXA-181	Plasmid	IncX3
		E. cloacae	4	PP (n=1), NN (n=2), BC (n=1)	3	ST1107, ST48, ST977	ST1107 (NN=2)	April and September 2017	Patient's Zone (n=1), Medical Equipment (n=1)	blaNDM-1	Plasmid	IncFIB/HI1B
		E. hormaechei	38	BC (n=4), BK (n=7), NK (n=3), NW (n=1), PP (n=19), RK (n=2), RU (n=1), ZAT (n=1)	15 (and 1 novel)	ST120, ST231, ST316, ST418, ST511, ST1372	ST120 (PP=3, RK=1)	January 2016 (RK), June-December 2016 (PP)	Emergency Neonatal Care (n=2, PP), Sinks and Water System (n=1, RK), Ward Furniture/Surfaces (n=1, PP)	blaNDM-1	Plasmid	IncFII (RK and PP, n=3), unknown (PP, n=1)
							ST231 (PP=3, RU=1, NW=1)	May-November 2016	Emergency Neonatal Care (n=2, PP), Sinks and Water System (n=1, NW), Medical Equipment (n=1, PP), NA (n=1, RU)	blaNDM-1	Chromosome (n=4), unknown (n=1)	NA
							ST316 (PP=5)	March-May 2017	Patient's Zone (n=2), Ward Furniture/Surfaces (n=2), Medical Equipment (n=1)	blaNDM-1, mcr-9 (n=4/5), blaNDM-1 (n=1/5)	Plasmid (n=3), unknown (n=2)	IncHI2 (blaNDM-1 and mcr-9, n=3), unknown (n=2)
							ST418 (BK=7)	October-November 2017	NA	blaNDM-1	Plasmid	IncFII (n=5/7), IncFII/FIB (n=2/7)
							ST511 (BC=3)	April-September 2017	Ward Furniture/Surfaces (n=2), NA (n=1)	blaNDM-1	Chromosome	NA
							ST1372 (PP=2, RK=1)	June 2016 (n=1, PP), March-April 2017 (n=2, PP and RK)	Emergency Neonatal Care (n=1), Sinks and Water System (n=1), Ward Furniture/Surfaces (n=1)	blaNDM-1 (PP=1), blaNDM-7 (PP and RK)	Plasmid	IncX3
		E. roggenkampii	3	PP (n=3)	1	ST523	ST523	March-May 2017	Patient's Zone (n=2), Ward Furniture/Surfaces (n=1)	blaNDM-1	Plasmid	IncFIB/HI1B
	K. michiganensis		3	PP (n=3)	1	ST354	ST354	July-December 2016	Medical Equipment (n=2), Mobile Medical Equipment (n=1)	blaNDM-1	Plasmid	IncFIB/HI1B (n=2), unknown (n=1)
	K. pneumoniae		38	PP (n=36), NN (n=1), RU (n=1)	10 (and 1 novel)	ST11, ST15, ST20, ST1317	ST11 (PP=2)	May 2016 (n=1), NA (n=1)	Medical Equipment (n=1) and NA (n=1)	blaNDM-1 and blaNDM-7	Plasmid	1 isolate: IncA/C and IncX3 (2 copies of blaNDM-7) 1 isolate: IncA/C (1 copy blaNDM-7) and IncX3 (1 copy blaNDM-1)
							ST15 (PP=16)	May-June 2016 (n=5), October2016-March2017 (n=5), December 2017 (n=1), NA (n=5)	Emergency Neonatal Care (n=5), Patient's Zone (n=4), Ward Furniture/Surfaces (n=1), Medical Equiment (n=1), NA (n=5)	blaNDM-1 only (n=5), blaNDM-1 and blaOXA-181 concomitantly (n=10), blaOXA-181 only (n=1)	Plasmid (n=15), unknown (n=1)	IncA/C (blaNDM-1), IncX3/ColKP3 (blaOXA-181)
							ST20 (PP=6)	September2016-March2017	Patient's Zone (n=2), Emergency Neonatal Care (n=1), Mobile Medical Equipment (n=1), Medical Equipment (n=1), Ward Furniture/Surfaces (n=1)	blaNDM-1 only (n=5), blaOXA-181 only (n=1)	Plasmid (n=3), unknown (n=3)	IncA/C (blaNDM-1, n=1), IncFIB/HI1B (blaNDM-1, n=2), unknown (n=3)
							ST1317 (PP=4)	November2016-April 2017	Emergency Neonatal Care (n=3), Sinks and Water System (n=1)	blaNDM-1	Plasmid (n=2), unknown (n=2)	IncFIA/FII/FIB (n=1), IncFIB/HI1B (n=1), unknown (n=2)
	K. quasipneumoniae		2	PP (n=1), NN (n=1)	2	ST4756 (PP), ST1887 (NN)	NA	February 2016 (NN), December 2016 (PP)	Sinks and Water System (NN), Medical Equipment (PP)	blaNDM-1	Plasmid	IncFIB/HI1B (NN), IncHI1B (PP)
	L. adecarboxylata		9	PP (n=9)	NA	NA	NA	March-May 2017 (n=7/9)	Mostly Emergency Neonatal Care (n=3/9) and Patient's Zone (n=3/9)	blaNDM-1	Plasmid (n=2/9), unknown for n=7/9	IncFIA
	P. asiatica		1	BC (n=1)	1	Novel (n=1)	NA	May 2017	Ward Furniture/Surfaces (n=1)	blaNDM-1	Chromosome	NA
	P. mendocina		1	BC (n=1)	NA	NA	NA	February 2017	Sinks and Water System (n=1)	blaNDM-1	Chromosome	NA
	P. putida		1	PP (n=1)	1	ST146	NA	NA	NA	blaNDM-1	NA	NA
	S. marcescens		9	BK (n=5), BC (n=2), PP (n=1), ES (n=1)	NA	NA	NA	August-November 2017 (BK), August 2016 (BC), September 2016 (PP), August 2017 (ES)	Sinks and Water System (n=2, BC and ES), Medical Equipment (n=2, BC and PP), NA (BK, n=5)	blaNDM-1	Plasmid	IncFII/FIB (n=3), IncL/M (n=5), unknown (n=1)
	S. xiamenensis		2	PP (n=1), RK (n=1)	NA	NA	NA	February 2016 (PP), March 2017 (RK)	Medical Equipment (n=1, PP), Sinks and Water System (n=1, RK)	blaNDM-1 and blaOXA-204 concomitantly (n=1, PP), blaOXA-204 only (n=1, RK)	plasmid (blaNDM-1), chromosome (blaOXA-204)	Unknown plasmid (blaNDM-1)
	S. acidaminiphila		1	BK (n=1)	NA	NA	NA	October 2017	NA	blaNDM-1	Chromosome	NA
	S. maltophilia		1	BK (n=1)	1	Novel (n=1)	NA	June 2017	NA	blaNDM-1	Chromosome	NA
