# Supplementary material for: Colonisation of extended spectrum β-lactamase- and carbapenemase-producing bacteria on hospital surfaces from low-/middle-income countries
Source: Research Square preprint supplement (doi:10.21203/rs.3.rs-3209071/v1), 2023-08-04
Supplement: Supplementary file 8 [file e64e7f7238036fd4e1cc086b.xlsx]

## Sheet: Raw samples metadata
Supplementary material. Colonisation of extended spectrum β-lactamase- and carbapenemase-producing bacteria on hospital surfaces from low-/middle-income countries
Table S7. Complete dataset. Raw metadata, including country and hospital site, where hospital surface swabs (HSS) were collected, as well as collection date and hospital surface, before data cleaning. Types of surfaces included in original surface column are the original surfaces informed in each hospital site; these were further corrected (data cleaning), classified into 19 categories and, event…
Country	Hospital	Sample code	Date	Original Surface	Corrected surfaces (309)	19 surface categories	6 final surface categories	V	VC	VE	PCRblaCTX-M-15	PCRblaNDM	PCRblaKPC	PCRblaOXA-48-like
Bangladesh	BC	BC-E1	2016-03-09	BASIN SWAB	Basin	basin/sink	Sinks and Water System	Y	Y	Y	P	neg	neg	neg
Bangladesh	BC	BC-E10	2016-04-18	OXYGEN CANNOLA	Oxygen cannola	Oxygen therapy	Mobile Medical Equipment	Y	Y	Y	P	neg	neg	neg
Bangladesh	BC	BC-E102	2016-09-15	FLOOR SWAB	floor	floor	Ward Furniture/Surfaces	Y	Y	Y	neg	neg	neg	neg
Bangladesh	BC	BC-E103	2016-09-17	OXYGEN MASK SWAB	oxygen mask	Oxygen therapy	Mobile Medical Equipment	Y	Y	Y	P	neg	neg	neg
Bangladesh	BC	BC-E104	2016-09-17	BASIN SWAB	Basin	basin/sink	Sinks and Water System	Y	Y	Y	neg	neg	neg	neg
Bangladesh	BC	BC-E106	2016-09-19	TRAY SWAB	tray	mobile medical equipment	Mobile Medical Equipment	Y	Y	Y	neg	neg	neg	neg
Bangladesh	BC	BC-E107	2016-09-20	STETHOSCOPE SWAB	stethoscope and sphygmomanometer	medical equipment	Medical Equipment	Y	Y	Y	neg	neg	neg	neg
Bangladesh	BC	BC-E108	2016-09-21	FLOOR SWAB	floor	floor	Ward Furniture/Surfaces	Y	Y	Y	neg	neg	neg	neg
Bangladesh	BC	BC-E11	2016-04-23	BASIN SWAB	Basin	basin/sink	Sinks and Water System	Y	Y	Y	P	neg	neg	neg
Bangladesh	BC	BC-E110	2016-09-22	BASIN SWAB	Basin	basin/sink	Sinks and Water System	Y	Y	Y	neg	neg	neg	neg
Bangladesh	BC	BC-E111	2016-09-24	SUCTION TUBE SWAB	suction tube	mobile medical equipment	Mobile Medical Equipment	Y	Y	Y	neg	neg	neg	neg
Bangladesh	BC	BC-E112	2016-09-24	TRAY SWAB	tray	mobile medical equipment	Mobile Medical Equipment	Y	Y	Y	neg	neg	neg	neg
Bangladesh	BC	BC-E114	2016-09-26	LABOUR ROOM BABY WARMER SIT SWAB	Labour room baby radiant warmer seat	radiant warmers& resuscitation room	Emergency Neonatal Care	Y	Y	N	neg	NA	NA	NA
Bangladesh	BC	BC-E118	2016-09-28	SIT SWAB	Seat	ward furniture/surfaces	Ward Furniture/Surfaces	Y	Y	Y	neg	neg	neg	neg
Bangladesh	BC	BC-E119	2016-09-29	BASIN SWAB	Basin	basin/sink	Sinks and Water System	Y	Y	Y	neg	neg	neg	neg
Bangladesh	BC	BC-E12	2016-04-30	RAKSIN SWAB	NA			Y	Y	Y	neg	neg	neg	neg
Bangladesh	BC	BC-E120	2016-09-29	RAKSIN SWAB	NA			Y	Y	Y	P	neg	neg	neg
Bangladesh	BC	BC-E121	2016-10-01	BASIN SWAB	Basin	basin/sink	Sinks and Water System	Y	Y	Y	neg	neg	neg	neg
Bangladesh	BC	BC-E122	2016-10-02	FLOOR SWAB	floor	floor	Ward Furniture/Surfaces	Y	Y	Y	neg	neg	neg	neg
Bangladesh	BC	BC-E123	2016-10-03	STETHOSCOPE SWAB	stethoscope and sphygmomanometer	medical equipment	Medical Equipment	Y	Y	Y	neg	neg	neg	neg
Bangladesh	BC	BC-E124	2016-10-04	KIDNEY TRAY SWAB	kidney tray	mobile medical equipment	Mobile Medical Equipment	Y	Y	Y	neg	neg	neg	neg
Bangladesh	BC	BC-E125	2016-10-05	SUCTION TUBE SWAB	suction tube	mobile medical equipment	Mobile Medical Equipment	Y	Y	Y	neg	neg	neg	neg
Bangladesh	BC	BC-E128	2016-10-08	RAKSIN SWAB	NA			Y	Y	Y	neg	neg	neg	neg
Bangladesh	BC	BC-E129	2016-10-09	BASIN SWAB	Basin	basin/sink	Sinks and Water System	Y	Y	Y	P	neg	neg	neg
Bangladesh	BC	BC-E13	2016-04-30	BASIN SWAB	Basin	basin/sink	Sinks and Water System	N	N	N	NA	NA	NA	NA
Bangladesh	BC	BC-E130	2016-10-10	SUCTION TUBE SWAB	suction tube	mobile medical equipment	Mobile Medical Equipment	Y	Y	Y	neg	neg	neg	neg
Bangladesh	BC	BC-E131	2016-10-13	STETHOSCOPE SWAB	stethoscope and sphygmomanometer	medical equipment	Medical Equipment	Y	Y	Y	P	neg	neg	neg
Bangladesh	BC	BC-E133	2016-10-15	RAKSIN SWAB	NA			Y	Y	Y	neg	neg	neg	neg
Bangladesh	BC	BC-E135	2016-10-17	DUSTBIN SWAB	Dustbin	ward furniture/surfaces	Ward Furniture/Surfaces	Y	Y	Y	neg	neg	neg	neg
Bangladesh	BC	BC-E137	2016-10-22	BASIN SWAB	Basin	basin/sink	Sinks and Water System	Y	Y	Y	neg	neg	neg	neg
Bangladesh	BC	BC-E139	2016-10-23	BASIN SWAB	Basin	basin/sink	Sinks and Water System	Y	Y	Y	neg	neg	neg	neg
Bangladesh	BC	BC-E14	2016-05-02	BASIN SWAB	Basin	basin/sink	Sinks and Water System	Y	Y	Y	P	neg	neg	neg
Bangladesh	BC	BC-E140	2016-10-24	TRAY SWAB	tray	mobile medical equipment	Mobile Medical Equipment	Y	Y	Y	neg	neg	neg	neg
Bangladesh	BC	BC-E145	2016-10-29	STETHOSCOPE SWAB	stethoscope and sphygmomanometer	medical equipment	Medical Equipment	Y	Y	Y	neg	neg	neg	neg
Bangladesh	BC	BC-E146	2016-10-30	GYNEE SIT SWAB	Gynecologist seat	ward furniture/surfaces	Ward Furniture/Surfaces	Y	Y	Y	neg	neg	neg	neg
Bangladesh	BC	BC-E148	2016-11-01	KIDNEY TRAY SWAB	kidney tray	mobile medical equipment	Mobile Medical Equipment	Y	Y	Y	neg	P	neg	neg
Bangladesh	BC	BC-E149	2016-11-02	FLOOR SWAB	floor	floor	Ward Furniture/Surfaces	Y	Y	Y	neg	neg	neg	neg
Bangladesh	BC	BC-E15	2016-05-03	OXYGEN MASK	oxygen mask	Oxygen therapy	Mobile Medical Equipment	Y	Y	Y	neg	neg	neg	neg
Bangladesh	BC	BC-E150	2016-11-02	RAKSIN SWAB	NA			Y	Y	Y	neg	neg	neg	neg
Bangladesh	BC	BC-E151	2016-11-03	BASIN SWAB	Basin	basin/sink	Sinks and Water System	N	N	N	NA	NA	NA	NA
Bangladesh	BC	BC-E152	2016-11-05	OXYGEN MASK SWAB	oxygen mask	Oxygen therapy	Mobile Medical Equipment	Y	Y	Y	neg	neg	neg	neg
Bangladesh	BC	BC-E155	2016-11-06	BASIN SWAB	Basin	basin/sink	Sinks and Water System	Y	Y	Y	neg	neg	neg	neg
Bangladesh	BC	BC-E156	2016-11-07	SUCTION SWAB	suction tube	mobile medical equipment	Mobile Medical Equipment	Y	Y	Y	neg	neg	neg	neg
Bangladesh	BC	BC-E159	2016-11-10	RAKSIN SWAB	NA			Y	Y	Y	neg	neg	neg	neg
Bangladesh	BC	BC-E16	2016-05-05	RAKSIN SWAB	NA			Y	Y	Y	P	neg	neg	neg
Bangladesh	BC	BC-E160	2016-11-12	BASIN SWAB	Basin	basin/sink	Sinks and Water System	Y	Y	Y	ND	P	neg	neg
Bangladesh	BC	BC-E163	2016-11-14	DUSTBIN SWAB	Dustbin	ward furniture/surfaces	Ward Furniture/Surfaces	N	N	N	NA	NA	NA	NA
Bangladesh	BC	BC-E164	2016-11-15	RAKSIN SWAB	NA			Y	Y	Y	neg	neg	neg	neg
Bangladesh	BC	BC-E165	2016-11-16	BASIN SWAB	Basin	basin/sink	Sinks and Water System	Y	Y	Y	P	neg	neg	neg
Bangladesh	BC	BC-E166	2016-11-17	FLOOR SWAB	floor	floor	Ward Furniture/Surfaces	Y	Y	Y	P	neg	neg	neg
Bangladesh	BC	BC-E167	2016-11-19	OXYGEN MASK SWAB	oxygen mask	Oxygen therapy	Mobile Medical Equipment	Y	Y	Y	ND	neg	neg	neg
Bangladesh	BC	BC-E168	2016-11-19	STETHOSCOPE SWAB	stethoscope and sphygmomanometer	medical equipment	Medical Equipment	Y	Y	Y	ND	neg	neg	neg
Bangladesh	BC	BC-E169	2016-11-20	SIT SWAB	Seat	ward furniture/surfaces	Ward Furniture/Surfaces	Y	Y	Y	ND	neg	neg	neg
Bangladesh	BC	BC-E17	2016-05-07	BASIN SWAB	Basin	basin/sink	Sinks and Water System	Y	Y	Y	neg	neg	neg	neg
Bangladesh	BC	BC-E170	2016-11-21	SUCTION TUBE SWAB	suction tube	mobile medical equipment	Mobile Medical Equipment	Y	N	N	NA	NA	NA	NA
Bangladesh	BC	BC-E172	2016-11-23	BASIN SWAB	Basin	basin/sink	Sinks and Water System	N	N	N	NA	NA	NA	NA
Bangladesh	BC	BC-E174	2016-11-26	OXYGEN MASK SWAB	oxygen mask	Oxygen therapy	Mobile Medical Equipment	Y	Y	Y	ND	P	neg	neg
Bangladesh	BC	BC-E177	2016-11-28	BASIN SWAB	Basin	basin/sink	Sinks and Water System	Y	Y	Y	ND	P	neg	neg
Bangladesh	BC	BC-E18	2016-05-07	OXYGEN CANNOLA	Oxygen cannola	Oxygen therapy	Mobile Medical Equipment	Y	Y	Y	neg	neg	neg	neg
Bangladesh	BC	BC-E180	2016-11-29	TRAY SWAB	tray	mobile medical equipment	Mobile Medical Equipment	Y	Y	Y	ND	neg	neg	neg
Bangladesh	BC	BC-E184	2016-12-04	DUSTBIN SWAB	Dustbin	ward furniture/surfaces	Ward Furniture/Surfaces	Y	Y	Y	ND	neg	neg	neg
Bangladesh	BC	BC-E188	2016-12-08	KIDNEY TRAY SWAB	kidney tray	mobile medical equipment	Mobile Medical Equipment	Y	Y	Y	ND	neg	neg	neg
Bangladesh	BC	BC-E189	2016-12-10	RAKSIN SWAB	NA			Y	Y	Y	ND	neg	neg	neg
Bangladesh	BC	BC-E19	2016-05-09	RAKSIN SWAB	NA			Y	Y	Y	neg	neg	neg	neg
Bangladesh	BC	BC-E190	2016-12-10	OXYGEN MASK SWAB	oxygen mask	Oxygen therapy	Mobile Medical Equipment	Y	Y	Y	ND	neg	neg	neg
Bangladesh	BC	BC-E191	2016-12-11	KIDNEY TRAY SWAB	kidney tray	mobile medical equipment	Mobile Medical Equipment	Y	Y	Y	ND	neg	neg	neg
Bangladesh	BC	BC-E194	2016-12-14	SIT SWAB	Seat	ward furniture/surfaces	Ward Furniture/Surfaces	Y	Y	Y	ND	neg	neg	neg
Bangladesh	BC	BC-E195	2016-12-15	FLOOR SWAB	floor	floor	Ward Furniture/Surfaces	Y	Y	Y	ND	P	neg	neg
Bangladesh	BC	BC-E196	2016-12-17	BABY TRAY SWAB	baby tray	mobile medical equipment	Mobile Medical Equipment	Y	Y	Y	ND	neg	neg	neg
Bangladesh	BC	BC-E199						N	N	N	NA	NA	NA	NA
Bangladesh	BC	BC-E2	2016-03-13	BASIN SWAB	Basin	basin/sink	Sinks and Water System	Y	Y	Y	P	neg	neg	neg
Bangladesh	BC	BC-E20	2016-05-11	BASIN SWAB	Basin	basin/sink	Sinks and Water System	Y	Y	Y	neg	neg	neg	neg
Bangladesh	BC	BC-E201	2016-12-20	SIT SWAB	Seat	ward furniture/surfaces	Ward Furniture/Surfaces	Y	Y	Y	ND	neg	neg	neg
Bangladesh	BC	BC-E202	2016-12-21	BASIN SWAB	Basin	basin/sink	Sinks and Water System	Y	Y	Y	ND	P	neg	neg
Bangladesh	BC	BC-E203	2016-12-22	FLOOR SWAB	floor	floor	Ward Furniture/Surfaces	Y	Y	Y	ND	P	neg	neg
Bangladesh	BC	BC-E205	2016-12-26	RAKSIN SWAB	NA			N	N	N	NA	NA	NA	NA
Bangladesh	BC	BC-E206	2016-12-26	DUSTBIN SWAB	Dustbin	ward furniture/surfaces	Ward Furniture/Surfaces	Y	Y	Y	ND	neg	neg	neg
Bangladesh	BC	BC-E208	2016-12-28	BASIN SWAB	Basin	basin/sink	Sinks and Water System	Y	Y	Y	ND	P	neg	neg
Bangladesh	BC	BC-E209	2016-12-29	OXYGEN MASK SWAB	oxygen mask	Oxygen therapy	Mobile Medical Equipment	Y	Y	Y	ND	neg	neg	neg
Bangladesh	BC	BC-E21	2016-05-11	RAKSIN SWAB	NA			Y	Y	Y	neg	neg	neg	neg
Bangladesh	BC	BC-E211	2017-01-01	RAKSIN SWAB	NA			Y	Y	Y	ND	P	neg	neg
Bangladesh	BC	BC-E213	2017-01-03	KIDNEY TRAY SWAB	kidney tray	mobile medical equipment	Mobile Medical Equipment	N	N	N	NA	NA	NA	NA
Bangladesh	BC	BC-E215	2017-01-12	KIDNEY TRAY SWAB	kidney tray	mobile medical equipment	Mobile Medical Equipment	Y	Y	Y	ND	P	neg	neg
Bangladesh	BC	BC-E216	2017-01-14	BASIN SWAB	Basin	basin/sink	Sinks and Water System	N	N	N	NA	NA	NA	NA
Bangladesh	BC	BC-E217	2017-01-15	FLOOR SWAB	floor	floor	Ward Furniture/Surfaces	Y	Y	Y	ND	P	neg	neg
Bangladesh	BC	BC-E22	2016-05-12	OXYGEN CANNOLA	Oxygen cannola	Oxygen therapy	Mobile Medical Equipment	Y	Y	Y	P	neg	neg	neg
Bangladesh	BC	BC-E220	2017-01-18	DASBIN SWAB	Dustbin	ward furniture/surfaces	Ward Furniture/Surfaces	Y	Y	Y	ND	P	neg	neg
Bangladesh	BC	BC-E221	2017-01-19	RAKSIN SWAB	NA			Y	Y	Y	ND	neg	neg	neg
Bangladesh	BC	BC-E222	2017-01-19	SIT SWAB	Seat	ward furniture/surfaces	Ward Furniture/Surfaces	Y	Y	Y	ND	neg	neg	neg
Bangladesh	BC	BC-E223	2017-01-21	KIDNEY TRAY SWAB	kidney tray	mobile medical equipment	Mobile Medical Equipment	N	N	N	NA	NA	NA	NA
Bangladesh	BC	BC-E224	2017-01-21	BASIN SWAB	Basin	basin/sink	Sinks and Water System	Y	Y	Y	ND	P	neg	neg
Bangladesh	BC	BC-E225	2017-01-22	STETHOSCOPE SWAB	stethoscope and sphygmomanometer	medical equipment	Medical Equipment	N	N	N	NA	NA	NA	NA
Bangladesh	BC	BC-E227	2017-01-24	SIT SWAB	Seat	ward furniture/surfaces	Ward Furniture/Surfaces	N	N	N	NA	NA	NA	NA
Bangladesh	BC	BC-E23	2016-05-12	BASIN SWAB	Basin	basin/sink	Sinks and Water System	Y	Y	Y	P	neg	neg	neg
Bangladesh	BC	BC-E231	2017-01-28	DUSTBIN SWAB	Dustbin	ward furniture/surfaces	Ward Furniture/Surfaces	Y	N	N	NA	NA	NA	NA
Bangladesh	BC	BC-E232	2017-01-29	OXYGEN MASK SWAB	oxygen mask	Oxygen therapy	Mobile Medical Equipment	N	N	N	NA	NA	NA	NA
Bangladesh	BC	BC-E233	2017-01-30	KIDNEY TRAY SWAB	kidney tray	mobile medical equipment	Mobile Medical Equipment	Y	Y	Y	ND	neg	neg	neg
Bangladesh	BC	BC-E234	2017-01-30	STETHOSCOPE SWAB	stethoscope and sphygmomanometer	medical equipment	Medical Equipment	N	N	N	NA	NA	NA	NA
Bangladesh	BC	BC-E235	2017-01-31	RAKSIN SWAB	NA			Y	Y	Y	ND	neg	neg	neg
Bangladesh	BC	BC-E236	2017-02-01	SUCTION TUBE SWAB	suction tube	mobile medical equipment	Mobile Medical Equipment	Y	N	N	NA	NA	NA	NA
Bangladesh	BC	BC-E238	2017-02-02	BASIN SWAB	Basin	basin/sink	Sinks and Water System	Y	Y	Y	ND	neg	neg	neg
Bangladesh	BC	BC-E239	2017-02-04	FLOOR SWAB	floor	floor	Ward Furniture/Surfaces	Y	Y	Y	ND	neg	neg	neg
Bangladesh	BC	BC-E24	2016-05-14	RAKSIN SWAB	NA			Y	Y	Y	neg	neg	neg	neg
Bangladesh	BC	BC-E240	2017-02-04	SIT SWAB	Seat	ward furniture/surfaces	Ward Furniture/Surfaces	N	N	N	NA	NA	NA	NA
Bangladesh	BC	BC-E241	2017-02-05	BASIN SWAB	Basin	basin/sink	Sinks and Water System	Y	Y	Y	ND	neg	neg	neg
Bangladesh	BC	BC-E243	2017-02-07	DASBIN SWAB	Dustbin	ward furniture/surfaces	Ward Furniture/Surfaces	N	N	N	NA	NA	NA	NA
Bangladesh	BC	BC-E244	2017-02-07	KIDNEY TRAY SWAB	kidney tray	mobile medical equipment	Mobile Medical Equipment	Y	Y	Y	neg	P	neg	neg
Bangladesh	BC	BC-E245	2017-02-08	SIT SWAB	Seat	ward furniture/surfaces	Ward Furniture/Surfaces	Y	Y	Y	neg	neg	neg	neg
Bangladesh	BC	BC-E246	2017-02-08	RAKSIN SWAB	NA			Y	Y	Y	neg	neg	neg	neg
Bangladesh	BC	BC-E247	2017-02-09	OXYGEN MASK SWAB	oxygen mask	Oxygen therapy	Mobile Medical Equipment	N	N	N	NA	NA	NA	NA
Bangladesh	BC	BC-E248	2017-02-09	BASIN SWAB	Basin	basin/sink	Sinks and Water System	Y	Y	Y	neg	neg	neg	neg
Bangladesh	BC	BC-E249	2017-02-12	RAKSIN SWAB	NA			Y	Y	Y	neg	neg	neg	neg
Bangladesh	BC	BC-E25	2016-05-14	RAKSIN SWAB	NA			Y	Y	Y	neg	neg	neg	neg
Bangladesh	BC	BC-E250	2017-02-12	KIDNEY TRAY SWAB	kidney tray	mobile medical equipment	Mobile Medical Equipment	Y	Y	Y	neg	neg	neg	neg
Bangladesh	BC	BC-E251	2017-02-13	SUCTION TUBE SWAB	suction tube	mobile medical equipment	Mobile Medical Equipment	Y	Y	Y	P	neg	neg	neg
Bangladesh	BC	BC-E252	2017-02-14	BASIN SWAB	Basin	basin/sink	Sinks and Water System	Y	Y	Y	neg	neg	neg	neg
Bangladesh	BC	BC-E253	2017-02-15	FLOOR SWAB	floor	floor	Ward Furniture/Surfaces	Y	Y	Y	neg	neg	neg	neg
Bangladesh	BC	BC-E255	2017-02-18	STETHOSCOPE SWAB	stethoscope and sphygmomanometer	medical equipment	Medical Equipment	Y	Y	N	neg	NA	NA	NA
Bangladesh	BC	BC-E256	2017-02-19	SIT SWAB	Seat	ward furniture/surfaces	Ward Furniture/Surfaces	Y	Y	Y	neg	neg	neg	neg
Bangladesh	BC	BC-E257	2017-02-20	WARMAR SIT SWAB	Radiant warmer seat	radiant warmers& resuscitation room	Emergency Neonatal Care	Y	Y	Y	neg	neg	neg	neg
Bangladesh	BC	BC-E258	2017-02-22	BASIN SWAB	Basin	basin/sink	Sinks and Water System	Y	Y	Y	neg	P	neg	neg
Bangladesh	BC	BC-E259	2017-02-23	KIDNEY TRAY SWAB	kidney tray	mobile medical equipment	Mobile Medical Equipment	N	N	N	NA	NA	NA	NA
Bangladesh	BC	BC-E26	2016-05-15	BASIN SWAB	Basin	basin/sink	Sinks and Water System	Y	Y	Y	P	neg	neg	neg
Bangladesh	BC	BC-E260	2017-02-25	FLOOR SWAB	floor	floor	Ward Furniture/Surfaces	Y	Y	Y	neg	neg	neg	neg
Bangladesh	BC	BC-E261	2017-02-25	RAKSIN SWAB	NA			Y	Y	Y	neg	neg	neg	neg
Bangladesh	BC	BC-E262	2017-02-26	DUSTBIN SWAB	Dustbin	ward furniture/surfaces	Ward Furniture/Surfaces	Y	N	N	NA	NA	NA	NA
Bangladesh	BC	BC-E263	2017-02-27	SUCTION TUBE SWAB	suction tube	mobile medical equipment	Mobile Medical Equipment	N	N	N	NA	NA	NA	NA
Bangladesh	BC	BC-E264	2017-02-28	BASIN SWAB	Basin	basin/sink	Sinks and Water System	Y	Y	Y	neg	neg	neg	neg
Bangladesh	BC	BC-E265	2017-03-16	FLOOR SWAB	floor	floor	Ward Furniture/Surfaces	Y	Y	Y	P	neg	neg	neg
Bangladesh	BC	BC-E266	2017-03-16	KIDNEY TRAY SWAB	kidney tray	mobile medical equipment	Mobile Medical Equipment	N	N	N	NA	NA	NA	NA
Bangladesh	BC	BC-E267	2017-03-18	GYNEE SIT SWAB	Gynecologist seat	ward furniture/surfaces	Ward Furniture/Surfaces	Y	Y	Y	neg	neg	neg	neg
Bangladesh	BC	BC-E268	2017-03-18	BASIN SWAB	Basin	basin/sink	Sinks and Water System	Y	Y	Y	neg	neg	neg	neg
Bangladesh	BC	BC-E269	2017-03-19	OXYGEN MASK SWAB	oxygen mask	Oxygen therapy	Mobile Medical Equipment	Y	Y	Y	neg	neg	neg	neg
Bangladesh	BC	BC-E27	2016-05-18	RAKSIN SWAB	NA			Y	Y	Y	neg	neg	neg	neg
Bangladesh	BC	BC-E270	2017-03-20	SIT SWAB	Seat	ward furniture/surfaces	Ward Furniture/Surfaces	Y	Y	Y	neg	neg	neg	neg
Bangladesh	BC	BC-E272	2017-03-22	RAKSIN SWAB	NA			Y	Y	Y	neg	neg	neg	neg
Bangladesh	BC	BC-E273	2017-03-23	DUSTBIN SWAB	Dustbin	ward furniture/surfaces	Ward Furniture/Surfaces	Y	Y	Y	neg	neg	neg	neg
Bangladesh	BC	BC-E274	2017-03-25	BASIN SWAB	Basin	basin/sink	Sinks and Water System	Y	Y	Y	neg	neg	neg	neg
Bangladesh	BC	BC-E275	2017-03-25	KIDNEY TRAY SWAB	kidney tray	mobile medical equipment	Mobile Medical Equipment	N	N	N	NA	NA	NA	NA
Bangladesh	BC	BC-E277	2017-03-28	OXYGEN MASK SWAB	oxygen mask	Oxygen therapy	Mobile Medical Equipment	Y	Y	Y	neg	neg	neg	neg
Bangladesh	BC	BC-E278	2017-03-29	RAKSIN SWAB	NA			Y	Y	Y	neg	neg	neg	neg
Bangladesh	BC	BC-E279	2017-03-29	BASIN SWAB	Basin	basin/sink	Sinks and Water System	Y	Y	Y	neg	P	neg	P
Bangladesh	BC	BC-E28	2016-06-28	BABY'S RAKSIN	NA			Y	Y	Y	P	P	neg	neg
Bangladesh	BC	BC-E280	2017-03-30	SIT SWAB	Seat	ward furniture/surfaces	Ward Furniture/Surfaces	Y	Y	Y	P	neg	neg	neg
Bangladesh	BC	BC-E283	2017-04-02	BASIN SWAB	Basin	basin/sink	Sinks and Water System	Y	Y	Y	neg	P	neg	neg
Bangladesh	BC	BC-E285	2017-04-04	RAKSIN SWAB	NA			Y	Y	Y	neg	neg	neg	neg
Bangladesh	BC	BC-E286	2017-04-05	BASIN SWAB	Basin	basin/sink	Sinks and Water System	Y	Y	Y	P	neg	neg	neg
Bangladesh	BC	BC-E287	2017-04-06	SIT SWAB	Seat	ward furniture/surfaces	Ward Furniture/Surfaces	Y	Y	Y	neg	neg	neg	neg
Bangladesh	BC	BC-E288	2017-04-08	TRAY SWAB	tray	mobile medical equipment	Mobile Medical Equipment	Y	Y	Y	neg	neg	neg	neg
Bangladesh	BC	BC-E289	2017-04-08	BASIN SWAB	Basin	basin/sink	Sinks and Water System	Y	Y	Y	neg	neg	neg	neg
Bangladesh	BC	BC-E29	2016-06-28	BASIN SWAB	Basin	basin/sink	Sinks and Water System	Y	Y	Y	neg	neg	neg	neg
Bangladesh	BC	BC-E290	2017-04-09	RAKSIN SWAB	NA			Y	Y	Y	neg	P	neg	neg
Bangladesh	BC	BC-E291	2017-04-09	DUSTBIN SWAB	Dustbin	ward furniture/surfaces	Ward Furniture/Surfaces	Y	Y	Y	neg	neg	neg	neg
Bangladesh	BC	BC-E292	2017-04-10	FLOOR SWAB	floor	floor	Ward Furniture/Surfaces	Y	Y	Y	neg	P	neg	neg
Bangladesh	BC	BC-E293	2017-04-10	SUCTION TUBE SWAB	suction tube	mobile medical equipment	Mobile Medical Equipment	Y	Y	Y	ND	neg	neg	neg
Bangladesh	BC	BC-E294	2017-04-11	WARMER SIT SWAB	Radiant warmer seat	radiant warmers& resuscitation room	Emergency Neonatal Care	Y	Y	Y	P	neg	neg	neg
Bangladesh	BC	BC-E295	2017-04-12	BASIN SWAB	Basin	basin/sink	Sinks and Water System	Y	Y	Y	neg	neg	neg	neg
Bangladesh	BC	BC-E296	2017-04-12	SIT SWAB	Seat	ward furniture/surfaces	Ward Furniture/Surfaces	Y	Y	Y	neg	P	neg	neg
Bangladesh	BC	BC-E297	2017-04-13	KIDNEY TRAY SWAB	kidney tray	mobile medical equipment	Mobile Medical Equipment	N	N	N	NA	NA	NA	NA
Bangladesh	BC	BC-E298	2017-04-16	RAKSIN SWAB	NA			Y	Y	Y	neg	neg	neg	neg
Bangladesh	BC	BC-E299	2017-04-16	DUSTBIN SWAB	Dustbin	ward furniture/surfaces	Ward Furniture/Surfaces	N	N	N	NA	NA	NA	NA
Bangladesh	BC	BC-E30	2016-06-29	OXYGEN MASK	oxygen mask	Oxygen therapy	Mobile Medical Equipment	Y	Y	Y	neg	neg	neg	neg
Bangladesh	BC	BC-E300	2017-04-17	BASIN SWAB	Basin	basin/sink	Sinks and Water System	Y	Y	Y	neg	neg	neg	neg
Bangladesh	BC	BC-E301	2017-04-18	STETHOSCOPE SWAB	stethoscope and sphygmomanometer	medical equipment	Medical Equipment	N	N	N	NA	NA	NA	NA
Bangladesh	BC	BC-E302	2017-04-18	RAKSIN SWAB	NA			Y	Y	Y	P	neg	neg	neg
Bangladesh	BC	BC-E303	2017-04-19	SIT SWAB	Seat	ward furniture/surfaces	Ward Furniture/Surfaces	Y	Y	Y	neg	P	neg	P
Bangladesh	BC	BC-E304	2017-04-20	KIDNEY TRAY SWAB	kidney tray	mobile medical equipment	Mobile Medical Equipment	Y	Y	Y	neg	neg	neg	neg
Bangladesh	BC	BC-E305	2017-04-20	OXYGEN MASK SWAB	oxygen mask	Oxygen therapy	Mobile Medical Equipment	Y	Y	Y	neg	neg	neg	neg
Bangladesh	BC	BC-E306	2017-04-22	BASIN SWAB	Basin	basin/sink	Sinks and Water System	Y	Y	Y	neg	neg	neg	P
Bangladesh	BC	BC-E307	2017-04-23	KIDNEY TRAY SWAB	kidney tray	mobile medical equipment	Mobile Medical Equipment	N	N	N	NA	NA	NA	NA
Bangladesh	BC	BC-E308	2017-04-24	STETHOSCOPE SWAB	stethoscope and sphygmomanometer	medical equipment	Medical Equipment	Y	Y	Y	P	neg	neg	neg
Bangladesh	BC	BC-E309	2017-04-25	BASIN SWAB	Basin	basin/sink	Sinks and Water System	Y	Y	Y	P	neg	neg	neg
Bangladesh	BC	BC-E31	2016-06-30	BASIN SWAB	Basin	basin/sink	Sinks and Water System	Y	Y	Y	neg	neg	neg	neg
Bangladesh	BC	BC-E310	2017-04-26	RAKSIN SWAB	NA			Y	Y	Y	neg	neg	neg	neg
Bangladesh	BC	BC-E311	2017-04-27	SIT SWAB	Seat	ward furniture/surfaces	Ward Furniture/Surfaces	Y	Y	Y	neg	neg	neg	neg
Bangladesh	BC	BC-E312	2017-04-29	BASIN SWAB	Basin	basin/sink	Sinks and Water System	Y	Y	Y	neg	neg	neg	neg
Bangladesh	BC	BC-E313	2017-04-30	KIDNEY TRAY SWAB	kidney tray	mobile medical equipment	Mobile Medical Equipment	Y	Y	Y	neg	neg	neg	neg
Bangladesh	BC	BC-E314	2017-05-02	RAKSIN SWAB	NA			Y	Y	Y	neg	neg	neg	neg
Bangladesh	BC	BC-E315	2017-05-02	SUCTION TUBE SWAB	suction tube	mobile medical equipment	Mobile Medical Equipment	Y	Y	Y	P	neg	neg	neg
Bangladesh	BC	BC-E316	2017-05-03	BASIN SWAB	Basin	basin/sink	Sinks and Water System	Y	Y	Y	neg	neg	neg	neg
Bangladesh	BC	BC-E317	2017-05-04	DUSTBIN SWAB	Dustbin	ward furniture/surfaces	Ward Furniture/Surfaces	Y	Y	Y	P	P	neg	neg
Bangladesh	BC	BC-E318	2017-05-06	SIT SWAB	Seat	ward furniture/surfaces	Ward Furniture/Surfaces	Y	Y	Y	neg	neg	neg	neg
Bangladesh	BC	BC-E319	2017-05-06	FLOOR SWAB	floor	floor	Ward Furniture/Surfaces	Y	Y	Y	neg	neg	neg	neg
Bangladesh	BC	BC-E32	2016-07-02	INCUBATOR	Incubator	incubators	Emergency Neonatal Care	Y	Y	Y	neg	neg	neg	neg
Bangladesh	BC	BC-E320	2017-05-07	SIT SWAB	Seat	ward furniture/surfaces	Ward Furniture/Surfaces	Y	Y	Y	neg	neg	neg	neg
Bangladesh	BC	BC-E321	2017-05-09	BASIN SWAB	Basin	basin/sink	Sinks and Water System	Y	Y	Y	neg	neg	neg	neg
Bangladesh	BC	BC-E322	2017-05-09	STETHOSCOPE SWAB	stethoscope and sphygmomanometer	medical equipment	Medical Equipment	Y	Y	Y	neg	neg	neg	neg
Bangladesh	BC	BC-E323	2017-05-11	SUCTION TUBE SWAB	suction tube	mobile medical equipment	Mobile Medical Equipment	Y	Y	Y	neg	neg	neg	neg
Bangladesh	BC	BC-E325	2017-05-14	RAKSIN SWAB	NA			Y	Y	Y	neg	neg	neg	neg
Bangladesh	BC	BC-E326	2017-05-15	KIDNEY TRAY SWAB	kidney tray	mobile medical equipment	Mobile Medical Equipment	Y	Y	Y	neg	neg	neg	neg
Bangladesh	BC	BC-E327	2017-05-16	SIT SWAB	Seat	ward furniture/surfaces	Ward Furniture/Surfaces	Y	Y	Y	P	neg	neg	neg
Bangladesh	BC	BC-E328	2017-05-17	DUSTBIN SWAB	Dustbin	ward furniture/surfaces	Ward Furniture/Surfaces	Y	Y	Y	neg	neg	neg	neg
Bangladesh	BC	BC-E329	2017-05-18	STETHOSCOPE SWAB	stethoscope and sphygmomanometer	medical equipment	Medical Equipment	Y	Y	Y	neg	neg	neg	neg
Bangladesh	BC	BC-E33	2016-07-02	OXYGEN MASK	oxygen mask	Oxygen therapy	Mobile Medical Equipment	Y	Y	Y	neg	neg	neg	neg
Bangladesh	BC	BC-E330	2017-05-20	BASIN SWAB	Basin	basin/sink	Sinks and Water System	Y	Y	Y	neg	neg	neg	neg
Bangladesh	BC	BC-E331	2017-05-20	FLOOR SWAB	floor	floor	Ward Furniture/Surfaces	Y	Y	Y	P	neg	neg	neg
Bangladesh	BC	BC-E332	2017-05-21	SUCTION TUBE SWAB	suction tube	mobile medical equipment	Mobile Medical Equipment	Y	Y	Y	neg	neg	neg	neg
Bangladesh	BC	BC-E333	2017-05-22	SIT SWAB	Seat	ward furniture/surfaces	Ward Furniture/Surfaces	Y	Y	Y	neg	neg	neg	neg
Bangladesh	BC	BC-E334	2017-05-23	RAKSIN SWAB	NA			Y	Y	Y	neg	neg	neg	neg
Bangladesh	BC	BC-E335	2017-05-24	BASIN SWAB	Basin	basin/sink	Sinks and Water System	Y	Y	Y	neg	neg	neg	neg
Bangladesh	BC	BC-E336	2017-05-25	SIT SWAB	Seat	ward furniture/surfaces	Ward Furniture/Surfaces	Y	Y	Y	neg	neg	neg	neg
Bangladesh	BC	BC-E337	2017-05-27	KIDNEY TRAY SWAB	kidney tray	mobile medical equipment	Mobile Medical Equipment	Y	Y	Y	neg	neg	neg	neg
Bangladesh	BC	BC-E338	2017-05-28	STETHOSCOPE SWAB	stethoscope and sphygmomanometer	medical equipment	Medical Equipment	Y	Y	Y	neg	neg	neg	neg
Bangladesh	BC	BC-E339	2017-05-29	DUSTBIN SWAB	Dustbin	ward furniture/surfaces	Ward Furniture/Surfaces	Y	Y	Y	neg	neg	neg	neg
Bangladesh	BC	BC-E34	2016-07-04	WARMAR SWAB	Radiant warmer seat	radiant warmers& resuscitation room	Emergency Neonatal Care	Y	Y	Y	neg	neg	neg	neg
Bangladesh	BC	BC-E340	2017-05-31	RAKSIN SWAB	NA			Y	Y	Y	neg	neg	neg	neg
Bangladesh	BC	BC-E341	2017-06-01	KIDNEY TRAY SWAB	kidney tray	mobile medical equipment	Mobile Medical Equipment	Y	Y	Y	neg	neg	neg	neg
Bangladesh	BC	BC-E342	2017-06-03	BASIN SWAB	Basin	basin/sink	Sinks and Water System	Y	Y	Y	neg	P	neg	neg
Bangladesh	BC	BC-E343	2017-06-04	FLOOR SWAB	floor	floor	Ward Furniture/Surfaces	Y	Y	Y	neg	P	neg	neg
Bangladesh	BC	BC-E344	2017-06-05	STETHOSCOPE SWAB	stethoscope and sphygmomanometer	medical equipment	Medical Equipment	N	N	N	NA	NA	NA	NA
Bangladesh	BC	BC-E345	2017-06-06	RAKSIN SWAB	NA			Y	Y	Y	neg	neg	neg	neg
Bangladesh	BC	BC-E346	2017-06-07	BASIN SWAB	Basin	basin/sink	Sinks and Water System	Y	Y	Y	neg	neg	neg	neg
Bangladesh	BC	BC-E347	2017-06-08	SIT SWAB	Seat	ward furniture/surfaces	Ward Furniture/Surfaces	Y	Y	Y	neg	P	neg	neg
Bangladesh	BC	BC-E348	2017-06-11	SIT SWAB	Seat	ward furniture/surfaces	Ward Furniture/Surfaces	Y	Y	Y	neg	neg	neg	neg
Bangladesh	BC	BC-E349	2017-06-11	SUCTION TUBE SWAB	suction tube	mobile medical equipment	Mobile Medical Equipment	Y	Y	Y	neg	neg	neg	neg
Bangladesh	BC	BC-E35	2016-07-04	RAKSIN SWAB	NA			Y	Y	Y	neg	neg	neg	neg
Bangladesh	BC	BC-E350	2017-06-12	BASIN SWAB	Basin	basin/sink	Sinks and Water System	Y	Y	Y	neg	neg	neg	neg
Bangladesh	BC	BC-E351	2017-06-14	RAKSIN SWAB	NA			Y	Y	Y	P	neg	neg	neg
Bangladesh	BC	BC-E352	2017-06-14	DUSTBIN SWAB	Dustbin	ward furniture/surfaces	Ward Furniture/Surfaces	Y	Y	Y	P	P	neg	neg
Bangladesh	BC	BC-E353	2017-06-15	KIDNEY TRAY SWAB	kidney tray	mobile medical equipment	Mobile Medical Equipment	Y	Y	Y	neg	neg	neg	neg
Bangladesh	BC	BC-E355	2017-06-18	STETHOSCOPE SWAB	stethoscope and sphygmomanometer	medical equipment	Medical Equipment	Y	Y	Y	neg	neg	neg	neg
Bangladesh	BC	BC-E356	2017-06-19	BASIN SWAB	Basin	basin/sink	Sinks and Water System	Y	Y	Y	neg	P	neg	neg
Bangladesh	BC	BC-E357	2017-06-20	RAKSIN SWAB	NA			Y	Y	Y	neg	neg	neg	neg
Bangladesh	BC	BC-E358	2017-06-21	FLOOR SWAB	floor	floor	Ward Furniture/Surfaces	Y	Y	Y	neg	neg	neg	neg
Bangladesh	BC	BC-E359	2017-06-22	DUSTBIN SWAB	Dustbin	ward furniture/surfaces	Ward Furniture/Surfaces	Y	Y	Y	neg	neg	neg	neg
Bangladesh	BC	BC-E360	2017-06-24	RAKSIN SWAB	NA			Y	Y	Y	neg	neg	neg	neg
Bangladesh	BC	BC-E361	2017-06-28	SIT SWAB	Seat	ward furniture/surfaces	Ward Furniture/Surfaces	Y	Y	Y	neg	neg	neg	neg
Bangladesh	BC	BC-E362	2017-06-28	KIDNEY TRAY SWAB	kidney tray	mobile medical equipment	Mobile Medical Equipment	N	N	N	NA	NA	NA	NA
Bangladesh	BC	BC-E363	2017-06-29	BASIN SWAB	Basin	basin/sink	Sinks and Water System	Y	Y	Y	P	neg	neg	neg
Bangladesh	BC	BC-E364	2017-07-01	DUSTBIN SWAB	Dustbin	ward furniture/surfaces	Ward Furniture/Surfaces	Y	Y	Y	neg	neg	neg	neg
Bangladesh	BC	BC-E365	2017-07-02	STETHOSCOPE SWAB	stethoscope and sphygmomanometer	medical equipment	Medical Equipment	Y	Y	Y	neg	neg	neg	neg
Bangladesh	BC	BC-E366	2017-07-03	SIT SWAB	Seat	ward furniture/surfaces	Ward Furniture/Surfaces	Y	Y	Y	neg	neg	neg	neg
Bangladesh	BC	BC-E367	2017-07-04	RAKSIN SWAB	NA			Y	Y	Y	P	neg	neg	neg
Bangladesh	BC	BC-E368	2017-07-05	FLOOR SWAB	floor	floor	Ward Furniture/Surfaces	Y	Y	Y	neg	neg	neg	neg
Bangladesh	BC	BC-E369	2017-07-06	BASIN SWAB	Basin	basin/sink	Sinks and Water System	Y	Y	Y	neg	neg	neg	neg
Bangladesh	BC	BC-E37	2016-07-10	BASIN SWAB	Basin	basin/sink	Sinks and Water System	Y	Y	Y	neg	neg	neg	neg
Bangladesh	BC	BC-E370	2017-07-08	KIDNEY TRAY SWAB	kidney tray	mobile medical equipment	Mobile Medical Equipment	N	N	N	NA	NA	NA	NA
Bangladesh	BC	BC-E371	2017-07-08	SIT SWAB	Seat	ward furniture/surfaces	Ward Furniture/Surfaces	Y	Y	Y	neg	neg	neg	neg
Bangladesh	BC	BC-E372	2017-07-09	DUSTBIN SWAB	Dustbin	ward furniture/surfaces	Ward Furniture/Surfaces	Y	Y	Y	P	P	neg	neg
Bangladesh	BC	BC-E373	2017-07-10	BASIN SWAB	Basin	basin/sink	Sinks and Water System	Y	Y	Y	neg	neg	neg	neg
Bangladesh	BC	BC-E374	2017-07-11	OXYGEN MASK SWAB	oxygen mask	Oxygen therapy	Mobile Medical Equipment	Y	Y	Y	neg	neg	neg	neg
Bangladesh	BC	BC-E375	2017-07-11	SIT SWAB	Seat	ward furniture/surfaces	Ward Furniture/Surfaces	Y	Y	Y	P	neg	neg	neg
Bangladesh	BC	BC-E376	2017-07-12	STETHOSCOPE SWAB	stethoscope and sphygmomanometer	medical equipment	Medical Equipment	Y	Y	Y	neg	neg	neg	neg
Bangladesh	BC	BC-E377	2017-07-13	RAKSIN SWAB	NA			Y	Y	Y	neg	neg	neg	neg
Bangladesh	BC	BC-E378	2017-07-15	BASIN SWAB	Basin	basin/sink	Sinks and Water System	Y	Y	Y	neg	neg	neg	neg
Bangladesh	BC	BC-E379	2017-07-16	WARMAR SIT SWAB	Radiant warmer seat	radiant warmers& resuscitation room	Emergency Neonatal Care	Y	Y	Y	neg	neg	neg	neg
Bangladesh	BC	BC-E38	2016-07-11	SUCTION TUBE SWAB	suction tube	mobile medical equipment	Mobile Medical Equipment	Y	Y	Y	neg	neg	neg	neg
Bangladesh	BC	BC-E380	2017-07-17	RAKSIN SWAB	NA			Y	Y	Y	neg	neg	neg	neg
Bangladesh	BC	BC-E381	2017-07-18	BASIN SWAB	Basin	basin/sink	Sinks and Water System	Y	Y	Y	neg	neg	neg	neg
Bangladesh	BC	BC-E382	2017-07-19	DUSTBIN SWAB	Dustbin	ward furniture/surfaces	Ward Furniture/Surfaces	Y	Y	Y	P	neg	neg	neg
Bangladesh	BC	BC-E383	2017-07-20	FLOOR SWAB	floor	floor	Ward Furniture/Surfaces	Y	Y	Y	neg	neg	neg	neg
Bangladesh	BC	BC-E384	2017-07-22	STETHOSCOPE SWAB	stethoscope and sphygmomanometer	medical equipment	Medical Equipment	N	N	N	NA	NA	NA	NA
Bangladesh	BC	BC-E385	2017-07-23	RAKSIN SWAB	NA			Y	Y	Y	neg	neg	neg	neg
Bangladesh	BC	BC-E386	2017-07-24	KIDNEY TRAY SWAB	kidney tray	mobile medical equipment	Mobile Medical Equipment	Y	Y	Y	neg	neg	neg	neg
Bangladesh	BC	BC-E387	2017-07-26	BASIN SWAB	Basin	basin/sink	Sinks and Water System	Y	Y	Y	neg	neg	neg	neg
Bangladesh	BC	BC-E388						Y	Y	Y	P	neg	neg	neg
Bangladesh	BC	BC-E389						Y	Y	Y	P	P	neg	neg
Bangladesh	BC	BC-E39	2016-07-11	BASIN SWAB	Basin	basin/sink	Sinks and Water System	Y	Y	Y	neg	neg	neg	neg
Bangladesh	BC	BC-E390						N	N	N	NA	NA	NA	NA
Bangladesh	BC	BC-E391						Y	Y	Y	neg	neg	neg	neg
Bangladesh	BC	BC-E392						Y	N	Y	NA	neg	neg	neg
Bangladesh	BC	BC-E393						Y	Y	Y	neg	neg	neg	neg
Bangladesh	BC	BC-E394						Y	Y	Y	neg	neg	neg	neg
Bangladesh	BC	BC-E395						Y	Y	Y	neg	neg	neg	neg
Bangladesh	BC	BC-E396						Y	Y	Y	neg	neg	neg	neg
Bangladesh	BC	BC-E397						Y	Y	Y	neg	neg	neg	neg
Bangladesh	BC	BC-E398						Y	Y	Y	neg	neg	neg	neg
Bangladesh	BC	BC-E399						Y	Y	Y	neg	neg	neg	neg
Bangladesh	BC	BC-E40	2016-07-12	WARMAR SWAB	Radiant warmer seat	radiant warmers& resuscitation room	Emergency Neonatal Care	Y	Y	Y	neg	neg	neg	neg
Bangladesh	BC	BC-E400						Y	Y	Y	P	neg	neg	neg
Bangladesh	BC	BC-E401						Y	Y	Y	neg	neg	neg	neg
Bangladesh	BC	BC-E402						Y	Y	Y	neg	neg	neg	neg
Bangladesh	BC	BC-E403						Y	Y	Y	neg	neg	neg	neg
Bangladesh	BC	BC-E404						Y	Y	Y	neg	neg	neg	neg
Bangladesh	BC	BC-E405						Y	Y	Y	P	neg	neg	neg
Bangladesh	BC	BC-E406						Y	Y	Y	neg	neg	neg	neg
Bangladesh	BC	BC-E407						Y	Y	Y	P	neg	neg	neg
Bangladesh	BC	BC-E408						Y	Y	Y	neg	neg	neg	neg
Bangladesh	BC	BC-E409						Y	Y	Y	neg	neg	neg	neg
Bangladesh	BC	BC-E41	2016-07-12	INCUBATOR	Incubator	incubators	Emergency Neonatal Care	Y	Y	Y	neg	neg	neg	neg
Bangladesh	BC	BC-E410						Y	Y	Y	neg	neg	neg	neg
Bangladesh	BC	BC-E411						Y	Y	Y	neg	neg	neg	neg
Bangladesh	BC	BC-E412						Y	Y	Y	neg	neg	neg	neg
Bangladesh	BC	BC-E413						Y	Y	Y	neg	neg	neg	neg
Bangladesh	BC	BC-E414						Y	Y	Y	neg	neg	neg	neg
Bangladesh	BC	BC-E415						Y	Y	Y	P	P	neg	neg
Bangladesh	BC	BC-E416						Y	Y	Y	P	neg	neg	neg
Bangladesh	BC	BC-E417						Y	Y	Y	P	neg	neg	neg
Bangladesh	BC	BC-E418						Y	Y	Y	P	neg	neg	neg
Bangladesh	BC	BC-E419	2017-09-05					Y	Y	Y	ND	P	neg	neg
Bangladesh	BC	BC-E42	2016-07-13	BASIN SWAB	Basin	basin/sink	Sinks and Water System	Y	Y	Y	neg	neg	neg	neg
Bangladesh	BC	BC-E420	2017-09-06					Y	Y	Y	ND	P	neg	neg
Bangladesh	BC	BC-E421	2017-09-07					Y	Y	Y	ND	P	neg	neg
Bangladesh	BC	BC-E422	2017-09-09					Y	Y	Y	ND	P	neg	neg
Bangladesh	BC	BC-E423	2017-09-10					Y	Y	Y	ND	neg	neg	neg
Bangladesh	BC	BC-E424	2017-09-11					Y	Y	Y	ND	neg	neg	neg
Bangladesh	BC	BC-E425	2017-09-12					Y	Y	N	ND	NA	NA	NA
Bangladesh	BC	BC-E426	2017-09-13					Y	Y	Y	ND	neg	neg	neg
Bangladesh	BC	BC-E427	2017-09-14					Y	Y	Y	ND	neg	neg	neg
Bangladesh	BC	BC-E428	2017-09-16					N	N	N	NA	NA	NA	NA
Bangladesh	BC	BC-E429	2017-09-17					N	N	N	NA	NA	NA	NA
Bangladesh	BC	BC-E43	2016-07-16	RAKSIN SWAB	NA			Y	Y	Y	neg	neg	neg	neg
Bangladesh	BC	BC-E431	2017-09-19					Y	Y	Y	P	P	neg	neg
Bangladesh	BC	BC-E432	2017-09-20					Y	Y	Y	neg	neg	neg	neg
Bangladesh	BC	BC-E433	2017-09-21					Y	Y	Y	neg	neg	neg	neg
Bangladesh	BC	BC-E434	2017-09-23					Y	Y	Y	neg	neg	neg	neg
Bangladesh	BC	BC-E435	2017-09-23					Y	N	Y	NA	neg	neg	neg
Bangladesh	BC	BC-E439	2017-09-27					Y	Y	Y	P	neg	neg	neg
Bangladesh	BC	BC-E44	2016-07-16	OXYGEN CANNOLA SWAB	Oxygen cannola	Oxygen therapy	Mobile Medical Equipment	Y	Y	Y	neg	neg	neg	neg
Bangladesh	BC	BC-E441	2017-10-02					Y	Y	Y	neg	P	neg	neg
Bangladesh	BC	BC-E442	2017-10-02					Y	Y	Y	neg	neg	neg	neg
Bangladesh	BC	BC-E443	2017-10-03					Y	Y	Y	neg	neg	neg	neg
Bangladesh	BC	BC-E444	2017-10-04					Y	Y	Y	neg	neg	neg	neg
Bangladesh	BC	BC-E445	2017-10-05					Y	Y	Y	neg	neg	neg	neg
Bangladesh	BC	BC-E446	2017-10-07					Y	Y	Y	neg	neg	neg	neg
Bangladesh	BC	BC-E447	2017-10-08					Y	Y	Y	P	neg	neg	neg
Bangladesh	BC	BC-E448	2017-10-09					Y	Y	Y	P	neg	neg	neg
Bangladesh	BC	BC-E449	2017-10-10					Y	Y	Y	neg	neg	neg	neg
Bangladesh	BC	BC-E450	2017-10-11					Y	Y	Y	P	neg	neg	neg
Bangladesh	BC	BC-E452	2017-10-14					Y	Y	Y	neg	neg	neg	neg
Bangladesh	BC	BC-E453	2017-10-15					Y	Y	Y	P	neg	neg	neg
Bangladesh	BC	BC-E454	2017-10-16					Y	Y	Y	neg	neg	neg	neg
Bangladesh	BC	BC-E455	2017-10-17					Y	Y	Y	neg	neg	neg	neg
Bangladesh	BC	BC-E456	2017-10-18					Y	Y	Y	P	neg	neg	neg
Bangladesh	BC	BC-E457	2017-10-19					Y	Y	Y	P	P	neg	P
Bangladesh	BC	BC-E458	2017-10-22					Y	Y	Y	neg	neg	neg	neg
Bangladesh	BC	BC-E459	2017-10-23					Y	Y	Y	neg	neg	neg	neg
Bangladesh	BC	BC-E46	2016-07-18	WARMAR SWAB	Radiant warmer seat	radiant warmers& resuscitation room	Emergency Neonatal Care	Y	Y	Y	neg	neg	neg	neg
Bangladesh	BC	BC-E460	2017-10-24					Y	Y	Y	neg	neg	neg	neg
Bangladesh	BC	BC-E461	2017-10-25					Y	Y	Y	P	neg	neg	neg
Bangladesh	BC	BC-E462	2017-10-26					Y	Y	Y	neg	neg	neg	neg
Bangladesh	BC	BC-E463	2017-10-28					Y	Y	Y	neg	neg	neg	neg
Bangladesh	BC	BC-E464	2017-10-29					Y	Y	Y	neg	neg	neg	neg
Bangladesh	BC	BC-E465	2017-10-30					Y	Y	Y	P	neg	neg	neg
Bangladesh	BC	BC-E466	2017-10-31					Y	Y	N	P	NA	NA	NA
Bangladesh	BC	BC-E467	2017-11-01					Y	N	Y	NA	neg	neg	neg
Bangladesh	BC	BC-E468	2017-11-02					Y	Y	Y	neg	neg	neg	neg
Bangladesh	BC	BC-E469	2017-11-04					Y	Y	Y	neg	neg	neg	neg
Bangladesh	BC	BC-E47	2016-07-19	BASIN SWAB	Basin	basin/sink	Sinks and Water System	Y	Y	Y	neg	neg	neg	neg
Bangladesh	BC	BC-E470	2017-11-05					Y	Y	Y	neg	neg	neg	neg
Bangladesh	BC	BC-E471	2017-11-06					Y	Y	Y	neg	neg	neg	neg
Bangladesh	BC	BC-E472	2017-11-07					Y	Y	Y	neg	neg	neg	neg
Bangladesh	BC	BC-E473	2017-11-08					Y	Y	Y	neg	neg	neg	neg
Bangladesh	BC	BC-E474	2017-11-09					Y	Y	Y	neg	neg	neg	neg
Bangladesh	BC	BC-E475	2017-11-11					Y	Y	N	neg	NA	NA	NA
Bangladesh	BC	BC-E476	2017-11-13					N	N	N	NA	NA	NA	NA
Bangladesh	BC	BC-E477	2017-11-14					Y	Y	Y	neg	neg	neg	neg
Bangladesh	BC	BC-E478	2017-11-16					Y	Y	Y	neg	neg	neg	neg
Bangladesh	BC	BC-E479	2017-11-18					N	N	N	NA	NA	NA	NA
Bangladesh	BC	BC-E48	2016-07-20	SUCTION TUBE SWAB	suction tube	mobile medical equipment	Mobile Medical Equipment	Y	Y	Y	neg	neg	neg	neg
Bangladesh	BC	BC-E480	2017-11-19					Y	Y	Y	neg	neg	neg	neg
Bangladesh	BC	BC-E483	2017-11-22					Y	N	N	NA	NA	NA	NA
Bangladesh	BC	BC-E485	2017-11-25					Y	N	Y	NA	neg	neg	P
Bangladesh	BC	BC-E488	2017-11-28					Y	N	N	NA	NA	NA	NA
Bangladesh	BC	BC-E489	2017-11-29					Y	Y	Y	P	P	neg	neg
Bangladesh	BC	BC-E49	2016-07-20	RAKSIN SWAB	NA			Y	Y	Y	neg	neg	neg	neg
Bangladesh	BC	BC-E50	2016-07-21	OXYGEN CANNOLA SWAB	Oxygen cannola	Oxygen therapy	Mobile Medical Equipment	Y	Y	Y	neg	neg	neg	neg
Bangladesh	BC	BC-E51	2016-07-23	BASIN SWAB	Basin	basin/sink	Sinks and Water System	Y	Y	Y	neg	neg	neg	neg
Bangladesh	BC	BC-E52	2016-07-23	RAKSIN SWAB	NA			Y	Y	Y	neg	neg	neg	neg
Bangladesh	BC	BC-E53	2016-07-24	INCUBATOR SWAB	Incubator	incubators	Emergency Neonatal Care	Y	Y	Y	neg	neg	neg	neg
Bangladesh	BC	BC-E54	2016-07-25	BASIN SWAB	Basin	basin/sink	Sinks and Water System	Y	Y	Y	P	P	neg	neg
Bangladesh	BC	BC-E55	2016-07-26	FLOOR SWAB	floor	floor	Ward Furniture/Surfaces	Y	Y	Y	neg	neg	neg	neg
Bangladesh	BC	BC-E56	2016-07-26	RAKSIN SWAB	NA			Y	Y	Y	neg	neg	neg	neg
Bangladesh	BC	BC-E57	2016-07-27	KIDNEY TRAY	kidney tray	mobile medical equipment	Mobile Medical Equipment	Y	Y	Y	neg	neg	neg	neg
Bangladesh	BC	BC-E58	2016-07-28	RAKSIN SWAB	NA			Y	Y	Y	neg	neg	neg	neg
Bangladesh	BC	BC-E59	2016-07-31	BASIN SWAB	Basin	basin/sink	Sinks and Water System	Y	Y	Y	neg	neg	neg	neg
Bangladesh	BC	BC-E60	2016-08-01	RAKSIN SWAB	NA			N	N	N	NA	NA	NA	NA
Bangladesh	BC	BC-E61	2016-08-02	KIDNEY TRAY	kidney tray	mobile medical equipment	Mobile Medical Equipment	N	N	N	NA	NA	NA	NA
Bangladesh	BC	BC-E62	2016-08-02	OXYGEN CANNOLA SWAB	Oxygen cannola	Oxygen therapy	Mobile Medical Equipment	N	N	N	NA	NA	NA	NA
Bangladesh	BC	BC-E63	2016-08-03	RAKSIN SWAB	NA			Y	Y	Y	neg	neg	neg	neg
Bangladesh	BC	BC-E64	2016-08-04	FLOOR SWAB	floor	floor	Ward Furniture/Surfaces	Y	Y	Y	neg	neg	neg	neg
Bangladesh	BC	BC-E65	2016-08-04	BASIN SWAB	Basin	basin/sink	Sinks and Water System	Y	Y	Y	neg	P	neg	neg
Bangladesh	BC	BC-E66	2016-08-06	RAKSIN SWAB	NA			Y	Y	Y	neg	neg	neg	neg
Bangladesh	BC	BC-E67	2016-08-06	BASIN SWAB	Basin	basin/sink	Sinks and Water System	Y	Y	Y	neg	neg	neg	neg
Bangladesh	BC	BC-E68	2016-08-07	OXYGEN CANNOLA SWAB	Oxygen cannola	Oxygen therapy	Mobile Medical Equipment	Y	Y	Y	neg	neg	neg	neg
Bangladesh	BC	BC-E69	2016-08-08	WARMAR SIT	Radiant warmer seat	radiant warmers& resuscitation room	Emergency Neonatal Care	Y	Y	Y	neg	neg	neg	neg
Bangladesh	BC	BC-E7	2016-04-10	RAKSIN SWAB	NA			Y	Y	Y	P	neg	neg	neg
Bangladesh	BC	BC-E70	2016-08-08	BASKET SWAB	Basket	ward furniture/surfaces	Ward Furniture/Surfaces	Y	Y	Y	neg	neg	neg	neg
Bangladesh	BC	BC-E71	2016-08-09	STETHOSCOPE SWAB	stethoscope and sphygmomanometer	medical equipment	Medical Equipment	Y	Y	Y	neg	P	neg	neg
Bangladesh	BC	BC-E72	2016-08-10	NEONETAL FLOOR SWAB	neonatal floor	floor	Ward Furniture/Surfaces	Y	Y	Y	neg	P	neg	neg
Bangladesh	BC	BC-E73	2016-08-11	RAKSIN SWAB	NA			Y	Y	Y	neg	neg	neg	neg
Bangladesh	BC	BC-E74						N	N	N	NA	NA	NA	NA
Bangladesh	BC	BC-E75						N	N	N	NA	NA	NA	NA
Bangladesh	BC	BC-E76						N	N	N	NA	NA	NA	NA
Bangladesh	BC	BC-E77						Y	Y	Y	neg	neg	neg	neg
Bangladesh	BC	BC-E78						Y	Y	Y	neg	neg	neg	neg
Bangladesh	BC	BC-E79	2016-08-20	OXYGEN MASK SWAB	oxygen mask	Oxygen therapy	Mobile Medical Equipment	Y	Y	Y	neg	neg	neg	neg
Bangladesh	BC	BC-E8	2016-04-16	RAKSIN SWAB	NA			Y	Y	Y	neg	neg	neg	neg
Bangladesh	BC	BC-E80	2016-08-20	FLOOR SWAB	floor	floor	Ward Furniture/Surfaces	Y	Y	Y	P	neg	neg	neg
Bangladesh	BC	BC-E81	2016-08-21	BASIN SWAB	Basin	basin/sink	Sinks and Water System	Y	Y	Y	neg	neg	neg	neg
Bangladesh	BC	BC-E82	2016-08-22	RAKSIN SWAB	NA			Y	Y	Y	neg	neg	neg	neg
Bangladesh	BC	BC-E83	2016-08-23	KIDNEY TRAY SWAB	kidney tray	mobile medical equipment	Mobile Medical Equipment	Y	Y	Y	neg	neg	neg	neg
Bangladesh	BC	BC-E84	2016-08-24	KIDNEY TRAY SWAB	kidney tray	mobile medical equipment	Mobile Medical Equipment	Y	Y	Y	neg	neg	neg	neg
Bangladesh	BC	BC-E849						Y	Y	Y	neg	neg	neg	neg
Bangladesh	BC	BC-E85	2016-08-27	SUCTION BOTTLE SWAB	suction bottle	mobile medical equipment	Mobile Medical Equipment	Y	Y	Y	neg	neg	neg	neg
Bangladesh	BC	BC-E86	2016-08-27	OXYGEN MASK SWAB	oxygen mask	Oxygen therapy	Mobile Medical Equipment	Y	Y	Y	P	neg	neg	neg
Bangladesh	BC	BC-E87	2016-08-28	BASIN SWAB	Basin	basin/sink	Sinks and Water System	Y	Y	Y	neg	neg	neg	neg
Bangladesh	BC	BC-E88	2016-08-29	FLOOR SWAB	floor	floor	Ward Furniture/Surfaces	Y	Y	Y	neg	neg	neg	neg
Bangladesh	BC	BC-E89	2016-08-30	RAKSIN SWAB	NA			Y	Y	Y	neg	neg	neg	neg
Bangladesh	BC	BC-E9	2016-04-16	BASIN SWAB	Basin	basin/sink	Sinks and Water System	Y	Y	Y	neg	neg	neg	neg
Bangladesh	BC	BC-E90	2016-08-30	TRAY SWAB	tray	mobile medical equipment	Mobile Medical Equipment	Y	Y	Y	neg	neg	neg	neg
Bangladesh	BC	BC-E91	2016-08-31	BED SWAB	Bed	ward furniture/surfaces	Patient's Zone	Y	Y	Y	neg	neg	neg	neg
Bangladesh	BC	BC-E92	2016-09-01	SUCTION TUBE SWAB	suction tube	mobile medical equipment	Mobile Medical Equipment	Y	Y	Y	neg	neg	neg	neg
Bangladesh	BC	BC-E94	2016-09-03	BASIN SWAB	Basin	basin/sink	Sinks and Water System	Y	Y	Y	neg	neg	neg	neg
Bangladesh	BC	BC-E95	2016-09-04	RAKSIN SWAB	NA			Y	Y	Y	neg	neg	neg	neg
Bangladesh	BC	BC-E951						Y	Y	Y	neg	neg	neg	neg
Bangladesh	BC	BC-E96	2016-09-05	FLOOR SWAB	floor	floor	Ward Furniture/Surfaces	Y	Y	Y	neg	neg	neg	neg
Bangladesh	BC	BC-E97	2016-09-06	KIDNEY TRAY SWAB	kidney tray	mobile medical equipment	Mobile Medical Equipment	Y	Y	Y	neg	neg	neg	neg
Bangladesh	BC	BC-E98	2016-09-07	SUCTION TUBE SWAB	suction tube	mobile medical equipment	Mobile Medical Equipment	Y	Y	Y	neg	neg	neg	neg
Bangladesh	BC	BC-E99	2016-09-07	BASIN SWAB	Basin	basin/sink	Sinks and Water System	Y	Y	Y	neg	neg	neg	neg
Bangladesh	BK	BK-E103-001	2015-12-16	Baby Management Table	Baby's table	areas/objects around the baby	Patient's Zone	Y	Y	Y	neg	neg	neg	neg
Bangladesh	BK	BK-E104-001	2015-12-16	Penguine Sucker	suction bulb	mobile medical equipment	Mobile Medical Equipment	Y	Y	Y	neg	neg	neg	neg
Bangladesh	BK	BK-E108-001	2015-12-17	Labour Table	Labour table	ward furniture/surfaces	Ward Furniture/Surfaces	Y	Y	Y	P	neg	neg	neg
Bangladesh	BK	BK-E114-001	2015-12-18	Baby Management Table	Baby's table	areas/objects around the baby	Patient's Zone	Y	Y	Y	neg	neg	neg	neg
Bangladesh	BK	BK-E119	2016-01-04	Baby Table	Baby's table	areas/objects around the baby	Patient's Zone	Y	Y	Y	P	neg	neg	neg
Bangladesh	BK	BK-E120-01	2015-12-19	Labour Table	Labour table	ward furniture/surfaces	Ward Furniture/Surfaces	Y	Y	Y	neg	neg	neg	neg
Bangladesh	BK	BK-E120-02	2015-12-19	Baby Management Table	Baby's table	areas/objects around the baby	Patient's Zone	Y	Y	Y	neg	neg	neg	neg
Bangladesh	BK	BK-E124	2016-06-04	Baby Table	Baby's table	areas/objects around the baby	Patient's Zone	Y	Y	Y	neg	neg	neg	neg
Bangladesh	BK	BK-E124-01	2015-12-20	Penguine Sucker	suction bulb	mobile medical equipment	Mobile Medical Equipment	Y	Y	Y	neg	neg	neg	neg
Bangladesh	BK	BK-E125	2016-07-04	Baby Tray	baby tray	mobile medical equipment	Mobile Medical Equipment	Y	Y	Y	neg	neg	neg	neg
Bangladesh	BK	BK-E126	2016-08-04	Labour Table	Labour table	ward furniture/surfaces	Ward Furniture/Surfaces	Y	Y	Y	neg	neg	neg	neg
Bangladesh	BK	BK-E127	2016-09-04	Baby Table	Baby's table	areas/objects around the baby	Patient's Zone	Y	Y	Y	neg	neg	neg	neg
Bangladesh	BK	BK-E128	2016-10-04	Penguine Sucker	suction bulb	mobile medical equipment	Mobile Medical Equipment	Y	Y	Y	neg	neg	neg	neg
Bangladesh	BK	BK-E129	2016-11-04	Labour Table	Labour table	ward furniture/surfaces	Ward Furniture/Surfaces	Y	Y	Y	neg	neg	neg	neg
Bangladesh	BK	BK-E129-01	2015-12-21	Basin	Basin	basin/sink	Sinks and Water System	Y	Y	Y	P	P	neg	neg
Bangladesh	BK	BK-E130	2016-12-04	Labour Table	Labour table	ward furniture/surfaces	Ward Furniture/Surfaces	Y	Y	Y	neg	neg	neg	neg
Bangladesh	BK	BK-E131	2016-04-13	Baby Table	Baby's table	areas/objects around the baby	Patient's Zone	Y	Y	Y	P	neg	neg	neg
Bangladesh	BK	BK-E132	2016-04-14	Labour Table	Labour table	ward furniture/surfaces	Ward Furniture/Surfaces	Y	Y	Y	neg	neg	neg	neg
Bangladesh	BK	BK-E132-01	2015-12-22	Labour Table	Labour table	ward furniture/surfaces	Ward Furniture/Surfaces	Y	Y	Y	neg	neg	neg	neg
Bangladesh	BK	BK-E133	2016-04-15	Penguine Sucker	suction bulb	mobile medical equipment	Mobile Medical Equipment	Y	Y	Y	P	neg	neg	neg
Bangladesh	BK	BK-E134	2016-04-16	Labour Table	Labour table	ward furniture/surfaces	Ward Furniture/Surfaces	Y	Y	Y	neg	neg	neg	neg
Bangladesh	BK	BK-E135	2016-04-17	Baby Table	Baby's table	areas/objects around the baby	Patient's Zone	Y	Y	Y	neg	neg	neg	neg
Bangladesh	BK	BK-E136	2016-04-18	Labour Table	Labour table	ward furniture/surfaces	Ward Furniture/Surfaces	Y	Y	Y	neg	neg	neg	neg
Bangladesh	BK	BK-E136-01	2015-12-23	Baby Management Table	Baby's table	areas/objects around the baby	Patient's Zone	Y	Y	Y	neg	neg	neg	neg
Bangladesh	BK	BK-E137	2016-04-19	Baby Table	Baby's table	areas/objects around the baby	Patient's Zone	Y	Y	Y	neg	neg	neg	neg
Bangladesh	BK	BK-E138	2016-04-21	Baby Table	Baby's table	areas/objects around the baby	Patient's Zone	Y	Y	Y	neg	neg	neg	neg
Bangladesh	BK	BK-E139	2016-04-21	Basin	Basin	basin/sink	Sinks and Water System	Y	Y	Y	neg	neg	neg	neg
Bangladesh	BK	BK-E140	2016-04-22	Baby Table	Baby's table	areas/objects around the baby	Patient's Zone	Y	Y	Y	neg	neg	neg	neg
Bangladesh	BK	BK-E141	2016-04-23	Labour Table	Labour table	ward furniture/surfaces	Ward Furniture/Surfaces	Y	Y	Y	neg	neg	neg	neg
Bangladesh	BK	BK-E142	2016-04-24	Basin	Basin	basin/sink	Sinks and Water System	Y	Y	Y	neg	neg	neg	neg
Bangladesh	BK	BK-E143	2016-04-25	Labour Table	Labour table	ward furniture/surfaces	Ward Furniture/Surfaces	Y	Y	Y	neg	neg	neg	neg
Bangladesh	BK	BK-E144	2016-04-26	Penguine Sucker	suction bulb	mobile medical equipment	Mobile Medical Equipment	Y	Y	Y	neg	neg	neg	neg
Bangladesh	BK	BK-E145	2016-04-27	Baby Table	Baby's table	areas/objects around the baby	Patient's Zone	Y	Y	Y	neg	neg	neg	neg
Bangladesh	BK	BK-E145-01	2015-12-24	Labour Table	Labour table	ward furniture/surfaces	Ward Furniture/Surfaces	Y	Y	Y	neg	neg	neg	neg
Bangladesh	BK	BK-E146	2016-04-28	Baby Tray	baby tray	mobile medical equipment	Mobile Medical Equipment	Y	Y	Y	neg	neg	neg	neg
Bangladesh	BK	BK-E147	2016-04-29	Labour Table	Labour table	ward furniture/surfaces	Ward Furniture/Surfaces	Y	Y	Y	P	neg	neg	neg
Bangladesh	BK	BK-E148	2016-04-30	Basin	Basin	basin/sink	Sinks and Water System	Y	Y	Y	neg	neg	neg	neg
Bangladesh	BK	BK-E149	2016-01-05	Baby Table	Baby's table	areas/objects around the baby	Patient's Zone	Y	Y	Y	P	neg	neg	neg
Bangladesh	BK	BK-E149-01	2015-12-25	Baby Management Table	Baby's table	areas/objects around the baby	Patient's Zone	Y	Y	Y	P	neg	neg	neg
Bangladesh	BK	BK-E150	2016-02-05	Labour Table	Labour table	ward furniture/surfaces	Ward Furniture/Surfaces	Y	Y	Y	neg	neg	neg	neg
Bangladesh	BK	BK-E151	2016-03-05	Labour Table	Labour table	ward furniture/surfaces	Ward Furniture/Surfaces	Y	Y	Y	neg	neg	neg	neg
Bangladesh	BK	BK-E151-01	2015-12-26	Baby Management Table	Baby's table	areas/objects around the baby	Patient's Zone	Y	Y	Y	neg	neg	neg	neg
Bangladesh	BK	BK-E152	2016-04-05	Basin	Basin	basin/sink	Sinks and Water System	N	N	N	NA	NA	NA	NA
Bangladesh	BK	BK-E153	2016-05-05	Penguine Sucker	suction bulb	mobile medical equipment	Mobile Medical Equipment	N	N	N	NA	NA	NA	NA
Bangladesh	BK	BK-E154	2016-06-05	Baby Tray	baby tray	mobile medical equipment	Mobile Medical Equipment	Y	Y	Y	P	neg	neg	neg
Bangladesh	BK	BK-E155	2016-07-05	Penguine Sucker	suction bulb	mobile medical equipment	Mobile Medical Equipment	Y	Y	Y	neg	neg	neg	neg
Bangladesh	BK	BK-E156	2016-08-05	Labour Table	Labour table	ward furniture/surfaces	Ward Furniture/Surfaces	Y	Y	Y	neg	neg	neg	neg
Bangladesh	BK	BK-E156-01	2015-12-27	Labour Table	Labour table	ward furniture/surfaces	Ward Furniture/Surfaces	Y	Y	Y	neg	neg	neg	neg
Bangladesh	BK	BK-E157	2016-09-05	Baby Table	Baby's table	areas/objects around the baby	Patient's Zone	Y	Y	Y	neg	neg	neg	neg
Bangladesh	BK	BK-E158	2016-10-05	Penguine Sucker	suction bulb	mobile medical equipment	Mobile Medical Equipment	Y	Y	Y	neg	neg	neg	neg
Bangladesh	BK	BK-E159	2016-11-05	Labour Table	Labour table	ward furniture/surfaces	Ward Furniture/Surfaces	Y	Y	Y	P	neg	neg	neg
Bangladesh	BK	BK-E160	2016-12-05	Baby Table	Baby's table	areas/objects around the baby	Patient's Zone	Y	Y	Y	neg	neg	neg	neg
Bangladesh	BK	BK-E160-01	2015-12-28	Baby Management Table	Baby's table	areas/objects around the baby	Patient's Zone	Y	Y	Y	neg	neg	neg	neg
Bangladesh	BK	BK-E161	2016-05-13	Labour Table	Labour table	ward furniture/surfaces	Ward Furniture/Surfaces	N	N	N	NA	NA	NA	NA
Bangladesh	BK	BK-E162	2016-05-14	Penguine Sucker	suction bulb	mobile medical equipment	Mobile Medical Equipment	N	N	N	NA	NA	NA	NA
Bangladesh	BK	BK-E162-01	2015-12-29	Labour Table	Labour table	ward furniture/surfaces	Ward Furniture/Surfaces	Y	Y	Y	neg	neg	neg	neg
Bangladesh	BK	BK-E163	18/05/2016	Penguine Sucker	suction bulb	mobile medical equipment	Mobile Medical Equipment	N	N	N	NA	NA	NA	NA
Bangladesh	BK	BK-E166-01	2015-12-30	Penguine Sucker	suction bulb	mobile medical equipment	Mobile Medical Equipment	Y	Y	Y	neg	neg	neg	neg
Bangladesh	BK	BK-E168	21/05/2016	Baby Table	Baby's table	areas/objects around the baby	Patient's Zone	Y	Y	Y	neg	neg	neg	neg
Bangladesh	BK	BK-E169	22/05/2016	Labour Table	Labour table	ward furniture/surfaces	Ward Furniture/Surfaces	Y	Y	Y	neg	neg	neg	neg
Bangladesh	BK	BK-E170	23/05/2016	Basin	Basin	basin/sink	Sinks and Water System	Y	Y	Y	neg	P	neg	neg
Bangladesh	BK	BK-E171	24/05/2016	Baby Table	Baby's table	areas/objects around the baby	Patient's Zone	Y	Y	Y	neg	neg	neg	neg
Bangladesh	BK	BK-E172	25/05/2016	Penguine Sucker	suction bulb	mobile medical equipment	Mobile Medical Equipment	Y	Y	Y	neg	neg	neg	neg
Bangladesh	BK	BK-E173	26/05/2016	Baby Tray	baby tray	mobile medical equipment	Mobile Medical Equipment	Y	Y	Y	neg	neg	neg	neg
Bangladesh	BK	BK-E173-01	2015-12-31	Labour Table	Labour table	ward furniture/surfaces	Ward Furniture/Surfaces	Y	Y	Y	neg	neg	neg	neg
Bangladesh	BK	BK-E174	27/05/2016	Basin	Basin	basin/sink	Sinks and Water System	Y	Y	Y	neg	neg	neg	neg
Bangladesh	BK	BK-E175	28/05/2016	Patient's bed	Bed	ward furniture/surfaces	Patient's Zone	Y	Y	Y	neg	neg	neg	neg
Bangladesh	BK	BK-E176	29/05/2016	Labour Table	Labour table	ward furniture/surfaces	Ward Furniture/Surfaces	Y	Y	Y	neg	neg	neg	neg
Bangladesh	BK	BK-E177	30/05/2016	Baby Table	Baby's table	areas/objects around the baby	Patient's Zone	Y	Y	Y	neg	neg	neg	neg
Bangladesh	BK	BK-E177-01	2016-01-01	Baby Management Table	Baby's table	areas/objects around the baby	Patient's Zone	Y	Y	Y	neg	neg	neg	neg
Bangladesh	BK	BK-E177-02	2016-01-02	Basin	Basin	basin/sink	Sinks and Water System	Y	Y	Y	P	P	neg	neg
Bangladesh	BK	BK-E178	31/05/2016	Basin	Basin	basin/sink	Sinks and Water System	Y	Y	Y	neg	neg	neg	neg
Bangladesh	BK	BK-E179	2016-01-06	Penguine Sucker	suction bulb	mobile medical equipment	Mobile Medical Equipment	Y	Y	Y	neg	neg	neg	neg
Bangladesh	BK	BK-E179-01	2016-01-03	Labour Table	Labour table	ward furniture/surfaces	Ward Furniture/Surfaces	Y	Y	Y	neg	P	neg	neg
Bangladesh	BK	BK-E180	2016-02-06	Labour Table	Labour table	ward furniture/surfaces	Ward Furniture/Surfaces	Y	Y	Y	neg	neg	neg	neg
Bangladesh	BK	BK-E181	2016-03-06	Dressing Table	Dressing table	ward furniture/surfaces	Ward Furniture/Surfaces	Y	Y	Y	neg	neg	neg	neg
Bangladesh	BK	BK-E182	2016-04-06	Penguine Sucker	suction bulb	mobile medical equipment	Mobile Medical Equipment	Y	Y	Y	neg	neg	neg	neg
Bangladesh	BK	BK-E182-01	2016-04-06	Penguine Sucker	suction bulb	mobile medical equipment	Mobile Medical Equipment	Y	Y	Y	neg	neg	neg	neg
Bangladesh	BK	BK-E183	2016-05-06	Baby Table	Baby's table	areas/objects around the baby	Patient's Zone	Y	Y	Y	neg	neg	neg	neg
Bangladesh	BK	BK-E183-01	2016-01-04	Baby Management Table	Baby's table	areas/objects around the baby	Patient's Zone	Y	Y	Y	neg	neg	neg	neg
Bangladesh	BK	BK-E184	2016-06-06	Wheel Chair	Wheelchair	ward furniture/surfaces	Ward Furniture/Surfaces	Y	Y	Y	neg	neg	neg	neg
Bangladesh	BK	BK-E184-01	2016-01-05	Labour Table	Labour table	ward furniture/surfaces	Ward Furniture/Surfaces	Y	Y	Y	neg	neg	neg	neg
Bangladesh	BK	BK-E185	2016-07-06	Labour Table	Labour table	ward furniture/surfaces	Ward Furniture/Surfaces	Y	Y	Y	neg	neg	neg	neg
Bangladesh	BK	BK-E186	2016-08-06	Baby Table	Baby's table	areas/objects around the baby	Patient's Zone	Y	Y	Y	neg	neg	neg	neg
Bangladesh	BK	BK-E187	2016-09-06	Basin	Basin	basin/sink	Sinks and Water System	Y	Y	Y	neg	neg	neg	neg
Bangladesh	BK	BK-E188	2016-10-06	Baby Table	Baby's table	areas/objects around the baby	Patient's Zone	Y	Y	Y	neg	neg	neg	neg
Bangladesh	BK	BK-E189	2016-11-06	Penguine Sucker	suction bulb	mobile medical equipment	Mobile Medical Equipment	Y	Y	Y	neg	neg	neg	neg
Bangladesh	BK	BK-E190	2016-12-06	Labour Table	Labour table	ward furniture/surfaces	Ward Furniture/Surfaces	Y	Y	Y	neg	neg	neg	neg
Bangladesh	BK	BK-E191	13/06/2016	Baby Table	Baby's table	areas/objects around the baby	Patient's Zone	Y	Y	Y	neg	neg	neg	neg
Bangladesh	BK	BK-E192	17/06/2016	Labour Table	Labour table	ward furniture/surfaces	Ward Furniture/Surfaces	Y	Y	Y	neg	neg	neg	neg
Bangladesh	BK	BK-E193	27/06/2016	Baby table	Baby's table	areas/objects around the baby	Patient's Zone	Y	Y	Y	neg	neg	neg	neg
Bangladesh	BK	BK-E193-01	2016-01-06	Baby Management Table	Baby's table	areas/objects around the baby	Patient's Zone	Y	Y	Y	neg	neg	neg	neg
Bangladesh	BK	BK-E194	28/06/2016	Penguine Sucker	suction bulb	mobile medical equipment	Mobile Medical Equipment	Y	Y	Y	P	neg	neg	neg
Bangladesh	BK	BK-E195	29/06/2016	Labour Table	Labour table	ward furniture/surfaces	Ward Furniture/Surfaces	Y	Y	Y	P	neg	neg	P
Bangladesh	BK	BK-E196	30/06/2016	Penguine Sucker	suction bulb	mobile medical equipment	Mobile Medical Equipment	Y	Y	Y	neg	neg	neg	neg
Bangladesh	BK	BK-E197	2016-01-07	Labour Table	Labour table	ward furniture/surfaces	Ward Furniture/Surfaces	Y	Y	Y	P	neg	neg	neg
Bangladesh	BK	BK-E197-01	2016-01-07	Penguine Sucker	suction bulb	mobile medical equipment	Mobile Medical Equipment	Y	Y	Y	neg	neg	neg	neg
Bangladesh	BK	BK-E198	2016-02-07	Basin	Basin	basin/sink	Sinks and Water System	Y	Y	Y	P	neg	neg	neg
Bangladesh	BK	BK-E199	2016-03-07	Labour Table	Labour table	ward furniture/surfaces	Ward Furniture/Surfaces	Y	Y	Y	neg	neg	neg	neg
Bangladesh	BK	BK-E200	2016-04-07	Basin	Basin	basin/sink	Sinks and Water System	Y	Y	Y	neg	neg	neg	neg
Bangladesh	BK	BK-E200.A	ND	ND	NA			Y	Y	N	neg	NA	NA	NA
Bangladesh	BK	BK-E200.B	ND	ND	NA			Y	Y	Y	neg	neg	neg	neg
Bangladesh	BK	BK-E201	2016-05-07	Baby table	Baby's table	areas/objects around the baby	Patient's Zone	Y	Y	Y	P	neg	neg	neg
Bangladesh	BK	BK-E202	2016-05-07	Labour Table	Labour table	ward furniture/surfaces	Ward Furniture/Surfaces	Y	Y	Y	P	neg	neg	neg
Bangladesh	BK	BK-E203	2016-06-07	Baby table	Baby's table	areas/objects around the baby	Patient's Zone	Y	Y	Y	neg	neg	neg	neg
Bangladesh	BK	BK-E203-01	2016-01-09	Labour Table	Labour table	ward furniture/surfaces	Ward Furniture/Surfaces	Y	Y	Y	neg	P	neg	neg
Bangladesh	BK	BK-E204	2016-06-07	Baby Cot	Baby's cot	areas/objects around the baby	Patient's Zone	Y	Y	Y	neg	neg	neg	neg
Bangladesh	BK	BK-E205	2016-07-07	Penguine Sucker	suction bulb	mobile medical equipment	Mobile Medical Equipment	Y	Y	Y	P	neg	neg	neg
Bangladesh	BK	BK-E206	2016-08-07	Baby table	Baby's table	areas/objects around the baby	Patient's Zone	Y	Y	Y	P	neg	neg	neg
Bangladesh	BK	BK-E207	2016-08-07	Baby Cot	Baby's cot	areas/objects around the baby	Patient's Zone	Y	Y	Y	P	neg	neg	neg
Bangladesh	BK	BK-E207-01	2016-01-10	Labour Table	Labour table	ward furniture/surfaces	Ward Furniture/Surfaces	Y	Y	Y	neg	neg	neg	neg
Bangladesh	BK	BK-E208	2016-09-07	Baby Cot	Baby's cot	areas/objects around the baby	Patient's Zone	Y	Y	Y	P	neg	neg	neg
Bangladesh	BK	BK-E209	2016-10-07	Penguine Sucker	suction bulb	mobile medical equipment	Mobile Medical Equipment	Y	Y	Y	neg	neg	neg	neg
Bangladesh	BK	BK-E210	2016-11-07	Baby table	Baby's table	areas/objects around the baby	Patient's Zone	Y	Y	Y	neg	neg	neg	neg
Bangladesh	BK	BK-E211	2016-12-07	Baby table	Baby's table	areas/objects around the baby	Patient's Zone	Y	Y	Y	P	neg	neg	neg
Bangladesh	BK	BK-E212	13/07/2016	Penguine Sucker	suction bulb	mobile medical equipment	Mobile Medical Equipment	Y	Y	Y	neg	neg	neg	neg
Bangladesh	BK	BK-E213	14/07/2016	Pt. Mattress	Mattress	ward furniture/surfaces	Ward Furniture/Surfaces	Y	Y	Y	P	neg	neg	neg
Bangladesh	BK	BK-E213-01	2016-01-11	Baby Management Table	Baby's table	areas/objects around the baby	Patient's Zone	Y	Y	Y	neg	neg	neg	neg
Bangladesh	BK	BK-E214	15/07/2016	Towel	Towel			Y	Y	Y	neg	neg	neg	neg
Bangladesh	BK	BK-E214-01	2016-01-12	Labour Table	Labour table	ward furniture/surfaces	Ward Furniture/Surfaces	Y	Y	Y	neg	neg	neg	neg
Bangladesh	BK	BK-E215	16/07/2016	Labour Table	Labour table	ward furniture/surfaces	Ward Furniture/Surfaces	Y	Y	Y	neg	neg	neg	neg
Bangladesh	BK	BK-E216	17/07/2016	Pt. Bed	Bed	ward furniture/surfaces	Patient's Zone	Y	Y	Y	neg	neg	neg	neg
Bangladesh	BK	BK-E217	18/07/2016	Basin	Basin	basin/sink	Sinks and Water System	Y	Y	Y	P	neg	neg	neg
Bangladesh	BK	BK-E217-01	2016-01-13	Baby Management Table	Baby's table	areas/objects around the baby	Patient's Zone	Y	Y	Y	neg	neg	neg	neg
Bangladesh	BK	BK-E218	19/07/2016	floor	floor	floor	Ward Furniture/Surfaces	Y	Y	Y	neg	neg	neg	neg
Bangladesh	BK	BK-E219	2016-07-20	Labour Table	Labour table	ward furniture/surfaces	Ward Furniture/Surfaces	Y	Y	Y	neg	neg	neg	neg
Bangladesh	BK	BK-E220	21/07/2016	Busket	Basket	ward furniture/surfaces	Ward Furniture/Surfaces	Y	Y	Y	neg	neg	neg	neg
Bangladesh	BK	BK-E221	22/07/2016	Basin	Basin	basin/sink	Sinks and Water System	Y	Y	Y	neg	neg	neg	neg
Bangladesh	BK	BK-E221-01	2016-01-14	Basin	Basin	basin/sink	Sinks and Water System	Y	Y	Y	P	neg	neg	neg
Bangladesh	BK	BK-E222	23/07/2016	Baby weight machine	Baby weighing scale	weighing scale/measuring tape	Patient's Zone	Y	Y	Y	P	neg	neg	neg
Bangladesh	BK	BK-E223	24/07/2016	basin and baby table	NA			Y	Y	Y	P	neg	neg	neg
Bangladesh	BK	BK-E223-01	2016-01-15	Labour Table	Labour table	ward furniture/surfaces	Ward Furniture/Surfaces	Y	Y	Y	P	neg	neg	neg
Bangladesh	BK	BK-E224	25/07/2016	Basin and patients locker	NA			Y	Y	Y	P	neg	neg	neg
Bangladesh	BK	BK-E225	26/07/2017	Baby table	Baby's table	areas/objects around the baby	Patient's Zone	Y	Y	Y	P	neg	neg	neg
Bangladesh	BK	BK-E226	27/07/2016	UMbo bag	Ambu bag (bag valve mask) and accessories	medical equipment	Medical Equipment	Y	Y	Y	P	neg	neg	neg
Bangladesh	BK	BK-E227	27/07/2016 and 28/07/2016	Patient bed and basin	NA			Y	Y	Y	neg	neg	neg	neg
Bangladesh	BK	BK-E227-01	2016-01-16	Baby Management Table	Baby's table	areas/objects around the baby	Patient's Zone	Y	Y	Y	neg	neg	neg	neg
Bangladesh	BK	BK-E228	29/07/2016	Basin	Basin	basin/sink	Sinks and Water System	Y	Y	Y	P	neg	neg	neg
Bangladesh	BK	BK-E229	30/07/2016	Baby table	Baby's table	areas/objects around the baby	Patient's Zone	Y	Y	Y	P	neg	neg	neg
Bangladesh	BK	BK-E230	31/07/2016	Panguine sucker	suction bulb	mobile medical equipment	Mobile Medical Equipment	Y	Y	Y	neg	neg	neg	neg
Bangladesh	BK	BK-E231	2016-01-08	Basin	Basin	basin/sink	Sinks and Water System	Y	Y	Y	P	neg	neg	neg
Bangladesh	BK	BK-E232	2016-08-02	Panguine sucker	suction bulb	mobile medical equipment	Mobile Medical Equipment	Y	Y	Y	neg	neg	neg	neg
Bangladesh	BK	BK-E232-01	2016-01-18	Baby Management Table	Baby's table	areas/objects around the baby	Patient's Zone	Y	Y	Y	neg	neg	neg	neg
Bangladesh	BK	BK-E233	2016-08-03	Site Busket	Basket	ward furniture/surfaces	Ward Furniture/Surfaces	Y	Y	Y	neg	neg	neg	neg
Bangladesh	BK	BK-E234	2016-08-04	Patient's bed	Bed	ward furniture/surfaces	Patient's Zone	Y	Y	Y	neg	neg	neg	neg
Bangladesh	BK	BK-E235	2016-08-05	Patient's bed	Bed	ward furniture/surfaces	Patient's Zone	Y	Y	Y	neg	neg	neg	neg
Bangladesh	BK	BK-E235-01	2016-01-19	Penguine Sucker	suction bulb	mobile medical equipment	Mobile Medical Equipment	Y	Y	Y	neg	P	neg	neg
Bangladesh	BK	BK-E236	2016-08-07	Weight machine	weighing scale	weighing scale/measuring tape	Patient's Zone	Y	Y	Y	P	neg	neg	neg
Bangladesh	BK	BK-E237	2016-08-07	Bed	Bed	ward furniture/surfaces	Patient's Zone	Y	Y	Y	neg	neg	neg	neg
Bangladesh	BK	BK-E238	2016-08-08	Floor	floor	floor	Ward Furniture/Surfaces	Y	Y	Y	neg	neg	neg	neg
Bangladesh	BK	BK-E238-01	2016-01-20	Labour Table	Labour table	ward furniture/surfaces	Ward Furniture/Surfaces	Y	Y	Y	P	neg	neg	neg
Bangladesh	BK	BK-E239	2016-09-08	Besin	Basin	basin/sink	Sinks and Water System	Y	Y	Y	neg	neg	neg	neg
Bangladesh	BK	BK-E240	2016-10-08	Labour Table	Labour table	ward furniture/surfaces	Ward Furniture/Surfaces	Y	Y	Y	P	neg	neg	neg
Bangladesh	BK	BK-E241	2016-08-11	Patient's bed	Bed	ward furniture/surfaces	Patient's Zone	Y	Y	Y	P	neg	neg	neg
Bangladesh	BK	BK-E242	2016-08-11	Baby tray	baby tray	mobile medical equipment	Mobile Medical Equipment	Y	Y	Y	P	neg	neg	neg
Bangladesh	BK	BK-E243	2016-08-12	Oxygen tube	Oxygen tube	Oxygen therapy	Mobile Medical Equipment	Y	Y	Y	P	neg	neg	neg
Bangladesh	BK	BK-E243-01	2016-01-21	Penguine Sucker	suction bulb	mobile medical equipment	Mobile Medical Equipment	Y	Y	Y	P	neg	neg	neg
Bangladesh	BK	BK-E243-02	2016-01-22	Penguine Sucker	suction bulb	mobile medical equipment	Mobile Medical Equipment	Y	Y	Y	P	neg	neg	neg
Bangladesh	BK	BK-E244	2016-08-12	Basin	Basin	basin/sink	Sinks and Water System	Y	Y	Y	neg	neg	neg	neg
Bangladesh	BK	BK-E245	13/08/2016	Bed relling	Bed	ward furniture/surfaces	Patient's Zone	Y	Y	Y	P	neg	neg	neg
Bangladesh	BK	BK-E245-01	2016-01-23	Baby Management Table	Baby's table	areas/objects around the baby	Patient's Zone	Y	Y	Y	neg	neg	neg	neg
Bangladesh	BK	BK-E246	14/08/2016	Sucker tube	suction tube	mobile medical equipment	Mobile Medical Equipment	Y	Y	Y	P	neg	neg	neg
Bangladesh	BK	BK-E247	15/08/2016	Floor	floor	floor	Ward Furniture/Surfaces	Y	Y	Y	neg	neg	neg	neg
Bangladesh	BK	BK-E248	16/08/2016	Basket	Basket	ward furniture/surfaces	Ward Furniture/Surfaces	Y	Y	Y	neg	neg	neg	neg
Bangladesh	BK	BK-E249	18/08/2016	Floor	floor	floor	Ward Furniture/Surfaces	Y	Y	Y	P	neg	neg	neg
Bangladesh	BK	BK-E250	18/08/2016	Bed	Bed	ward furniture/surfaces	Patient's Zone	Y	Y	Y	P	neg	neg	neg
Bangladesh	BK	BK-E251	19/08/2016	Baby Cord	umbilical cord			Y	Y	Y	neg	neg	neg	neg
Bangladesh	BK	BK-E251-01	2016-01-24	Baby Management Table	Baby's table	areas/objects around the baby	Patient's Zone	Y	Y	Y	neg	neg	neg	neg
Bangladesh	BK	BK-E252	20/08/2016	Basin	Basin	basin/sink	Sinks and Water System	Y	Y	Y	P	neg	neg	neg
Bangladesh	BK	BK-E253	21/08/2016	Patient bed	Bed	ward furniture/surfaces	Patient's Zone	Y	Y	Y	P	neg	neg	neg
Bangladesh	BK	BK-E254	22/08/2016	Baby Cord	umbilical cord			Y	Y	Y	neg	neg	neg	neg
Bangladesh	BK	BK-E255	23/08/2016	Weight machine	weighing scale	weighing scale/measuring tape	Patient's Zone	Y	Y	Y	P	neg	neg	neg
Bangladesh	BK	BK-E256	24/08/2016	Patient Matress	Mattress	ward furniture/surfaces	Ward Furniture/Surfaces	Y	Y	Y	P	neg	neg	neg
Bangladesh	BK	BK-E256-01	2016-01-25	Labour Table	Labour table	ward furniture/surfaces	Ward Furniture/Surfaces	Y	Y	Y	neg	neg	neg	neg
Bangladesh	BK	BK-E257	25/08/2016	Basin	Basin	basin/sink	Sinks and Water System	Y	Y	Y	neg	neg	neg	neg
Bangladesh	BK	BK-E258	26/08/2016	Baby Table	Baby's table	areas/objects around the baby	Patient's Zone	Y	Y	Y	neg	neg	neg	neg
Bangladesh	BK	BK-E259	27/08/2016	Weight machine	weighing scale	weighing scale/measuring tape	Patient's Zone	Y	Y	Y	neg	neg	neg	neg
Bangladesh	BK	BK-E260	28/08/2016	Panguine sucker	suction bulb	mobile medical equipment	Mobile Medical Equipment	Y	Y	Y	neg	neg	neg	neg
Bangladesh	BK	BK-E260-01	2016-01-26	Baby Management Table	Baby's table	areas/objects around the baby	Patient's Zone	Y	Y	Y	neg	neg	neg	neg
Bangladesh	BK	BK-E261	29/08/2016	Floor	floor	floor	Ward Furniture/Surfaces	Y	Y	Y	neg	neg	neg	neg
Bangladesh	BK	BK-E262	30/08/2016	Baby Table	Baby's table	areas/objects around the baby	Patient's Zone	Y	Y	Y	neg	neg	neg	neg
Bangladesh	BK	BK-E262-01	2016-01-27	Penguine Sucker	suction bulb	mobile medical equipment	Mobile Medical Equipment	Y	Y	Y	P	neg	neg	neg
Bangladesh	BK	BK-E263	31/08/2016	Basin	Basin	basin/sink	Sinks and Water System	Y	Y	Y	neg	neg	neg	neg
Bangladesh	BK	BK-E263-01	2016-01-28	Labour Table	Labour table	ward furniture/surfaces	Ward Furniture/Surfaces	Y	Y	Y	neg	neg	neg	neg
Bangladesh	BK	BK-E266-01	2016-01-29	Baby Management Table	Baby's table	areas/objects around the baby	Patient's Zone	Y	Y	Y	neg	neg	neg	neg
Bangladesh	BK	BK-E269-01	2016-09-04					Y	Y	Y	neg	neg	neg	neg
Bangladesh	BK	BK-E271-01	2016-09-06					Y	Y	Y	neg	P	neg	neg
Bangladesh	BK	BK-E271-02	2016-09-06					Y	Y	Y	neg	neg	neg	neg
Bangladesh	BK	BK-E275-01	2016-09-09					Y	Y	Y	P	neg	neg	neg
Bangladesh	BK	BK-E276-01	2016-09-09					Y	Y	Y	P	neg	neg	neg
Bangladesh	BK	BK-E280-01	2016-02-04	Penguine Sucker	suction bulb	mobile medical equipment	Mobile Medical Equipment	Y	Y	Y	neg	neg	neg	neg
Bangladesh	BK	BK-E284-01	2016-02-06	Baby tube	baby tube	mobile medical equipment	Mobile Medical Equipment	Y	Y	Y	neg	neg	neg	neg
Bangladesh	BK	BK-E286-01	2016-09-18					Y	Y	Y	neg	neg	neg	neg
Bangladesh	BK	BK-E287-01	2016-02-08	Baby tube	baby tube	mobile medical equipment	Mobile Medical Equipment	Y	Y	Y	neg	neg	neg	neg
Bangladesh	BK	BK-E290	2016-09-21					Y	Y	Y	ND	neg	neg	neg
Bangladesh	BK	BK-E291	2016-09-21					Y	Y	Y	ND	P	neg	neg
Bangladesh	BK	BK-E291-01	2016-02-10	Baby tube	baby tube	mobile medical equipment	Mobile Medical Equipment	Y	Y	Y	neg	neg	neg	neg
Bangladesh	BK	BK-E294	2016-09-24					Y	Y	Y	ND	neg	neg	neg
Bangladesh	BK	BK-E294-01	2016-02-11	Labour Table	Labour table	ward furniture/surfaces	Ward Furniture/Surfaces	Y	Y	Y	neg	neg	neg	neg
Bangladesh	BK	BK-E295-01	2016-02-12	Site Labour Table	Labour table	ward furniture/surfaces	Ward Furniture/Surfaces	Y	Y	Y	P	neg	neg	neg
Bangladesh	BK	BK-E296	2016-09-25					Y	Y	Y	ND	neg	neg	neg
Bangladesh	BK	BK-E297	2016-09-26					Y	Y	Y	ND	neg	neg	neg
Bangladesh	BK	BK-E298	2016-09-26					Y	Y	Y	ND	neg	neg	neg
Bangladesh	BK	BK-E298-01	2016-02-13	Site baby tube	baby tube	mobile medical equipment	Mobile Medical Equipment	Y	Y	Y	neg	neg	neg	neg
Bangladesh	BK	BK-E299	2016-09-27					Y	Y	Y	ND	neg	neg	neg
Bangladesh	BK	BK-E300	2016-09-28					Y	Y	Y	ND	P	neg	neg
Bangladesh	BK	BK-E301	2016-09-28					Y	Y	Y	ND	neg	neg	neg
Bangladesh	BK	BK-E301-01	2016-02-14	Baby tube	baby tube	mobile medical equipment	Mobile Medical Equipment	Y	Y	Y	P	neg	neg	neg
Bangladesh	BK	BK-E302	2016-09-30					Y	Y	Y	ND	neg	neg	neg
Bangladesh	BK	BK-E302-01	2016-02-15	Labour Table	Labour table	ward furniture/surfaces	Ward Furniture/Surfaces	Y	Y	Y	P	neg	neg	neg
Bangladesh	BK	BK-E303	2016-09-30					Y	Y	Y	ND	P	neg	neg
Bangladesh	BK	BK-E304	2016-10-02					Y	Y	Y	ND	neg	neg	neg
Bangladesh	BK	BK-E304-01	2016-02-16	Site Labour Table	Labour table	ward furniture/surfaces	Ward Furniture/Surfaces	Y	Y	Y	neg	neg	neg	neg
Bangladesh	BK	BK-E306	2016-10-04					Y	Y	Y	ND	neg	neg	neg
Bangladesh	BK	BK-E307	2016-10-05					Y	Y	Y	ND	neg	neg	neg
Bangladesh	BK	BK-E307-01	2016-02-17	Penguine Sucker	suction bulb	mobile medical equipment	Mobile Medical Equipment	Y	Y	Y	neg	neg	neg	neg
Bangladesh	BK	BK-E308-01	2016-02-18	Labour Table	Labour table	ward furniture/surfaces	Ward Furniture/Surfaces	Y	Y	Y	neg	P	neg	neg
Bangladesh	BK	BK-E309	2016-10-06					Y	Y	Y	ND	neg	neg	neg
Bangladesh	BK	BK-E310	2016-10-07					Y	Y	Y	ND	neg	neg	neg
Bangladesh	BK	BK-E310-01	2016-02-19	Baby tube	baby tube	mobile medical equipment	Mobile Medical Equipment	Y	Y	Y	neg	neg	neg	neg
Bangladesh	BK	BK-E311	2016-10-07					Y	Y	Y	ND	P	neg	neg
Bangladesh	BK	BK-E312	2016-10-08					Y	Y	Y	ND	neg	neg	neg
Bangladesh	BK	BK-E312-01	2016-02-12	Labour Table	Labour table	ward furniture/surfaces	Ward Furniture/Surfaces	Y	Y	Y	neg	P	neg	neg
Bangladesh	BK	BK-E313	2016-10-09					Y	Y	Y	ND	P	neg	neg
Bangladesh	BK	BK-E314-01	2016-02-21	Penguine Sucker	suction bulb	mobile medical equipment	Mobile Medical Equipment	Y	Y	Y	neg	neg	neg	neg
Bangladesh	BK	BK-E316-01	2016-02-22	Baby table	Baby's table	areas/objects around the baby	Patient's Zone	Y	Y	Y	neg	neg	neg	neg
Bangladesh	BK	BK-E318-01	2016-02-23	Baby Tray	baby tray	mobile medical equipment	Mobile Medical Equipment	Y	Y	Y	neg	neg	neg	neg
Bangladesh	BK	BK-E319	2016-10-14					Y	Y	Y	ND	neg	neg	neg
Bangladesh	BK	BK-E321-01	2016-02-24	Baby table	Baby's table	areas/objects around the baby	Patient's Zone	Y	Y	Y	neg	neg	neg	neg
Bangladesh	BK	BK-E324	2016-10-18					Y	Y	N	ND	NA	NA	NA
Bangladesh	BK	BK-E326-01	2016-02-25	Labour Table	Labour table	ward furniture/surfaces	Ward Furniture/Surfaces	Y	Y	Y	neg	P	neg	neg
Bangladesh	BK	BK-E326-02	2016-02-26	Basin	Basin	basin/sink	Sinks and Water System	Y	Y	Y	P	P	neg	neg
Bangladesh	BK	BK-E327-01	2016-02-27	Baby table	Baby's table	areas/objects around the baby	Patient's Zone	Y	Y	Y	neg	P	neg	neg
Bangladesh	BK	BK-E328-01	2016-02-28	Penguine Sucker	suction bulb	mobile medical equipment	Mobile Medical Equipment	Y	Y	Y	neg	neg	neg	neg
Bangladesh	BK	BK-E329	2016-10-23					Y	Y	Y	ND	neg	neg	neg
Bangladesh	BK	BK-E33-01	2015-11-28	Side- Labour Table	Labour table	ward furniture/surfaces	Ward Furniture/Surfaces	Y	Y	Y	neg	neg	neg	neg
Bangladesh	BK	BK-E33-02	2016-11-28	Side Baby Management Table	Baby's table	areas/objects around the baby	Patient's Zone	Y	Y	Y	neg	neg	neg	neg
Bangladesh	BK	BK-E330-01	2016-02-29	Baby table	Baby's table	areas/objects around the baby	Patient's Zone	Y	Y	Y	neg	P	neg	neg
Bangladesh	BK	BK-E331	2016-10-25					Y	Y	Y	ND	neg	neg	neg
Bangladesh	BK	BK-E332	2016-10-25					Y	Y	Y	ND	P	neg	neg
Bangladesh	BK	BK-E333	2016-10-25					Y	Y	Y	ND	neg	neg	neg
Bangladesh	BK	BK-E334	2016-10-27					Y	Y	Y	ND	neg	neg	neg
Bangladesh	BK	BK-E335-01	2016-03-01	Baby table	Baby's table	areas/objects around the baby	Patient's Zone	Y	Y	Y	neg	P	neg	neg
Bangladesh	BK	BK-E336-01	2016-03-02	Labour Table	Labour table	ward furniture/surfaces	Ward Furniture/Surfaces	Y	Y	Y	neg	neg	neg	neg
Bangladesh	BK	BK-E337	2016-10-30					Y	Y	Y	ND	neg	neg	neg
Bangladesh	BK	BK-E338-01	2016-03-03	Penguine Sucker	suction bulb	mobile medical equipment	Mobile Medical Equipment	Y	Y	Y	neg	P	neg	neg
Bangladesh	BK	BK-E339	2016-10-31					Y	Y	Y	ND	neg	neg	neg
Bangladesh	BK	BK-E339-01	2016-03-04	Baby Tray	baby tray	mobile medical equipment	Mobile Medical Equipment	Y	Y	Y	neg	neg	neg	neg
Bangladesh	BK	BK-E340	2016-11-01					Y	Y	Y	ND	neg	neg	neg
Bangladesh	BK	BK-E341-01	2016-03-05	Baby Table	Baby's table	areas/objects around the baby	Patient's Zone	Y	Y	Y	neg	neg	neg	neg
Bangladesh	BK	BK-E342	2016-11-02					Y	Y	Y	ND	neg	neg	neg
Bangladesh	BK	BK-E342-01	2016-03-06	Baby Table	Baby's table	areas/objects around the baby	Patient's Zone	Y	Y	Y	neg	P	neg	neg
Bangladesh	BK	BK-E343	2016-11-03					Y	Y	Y	ND	neg	neg	neg
Bangladesh	BK	BK-E343-01	2016-03-06	Labour Table	Labour table	ward furniture/surfaces	Ward Furniture/Surfaces	Y	Y	Y	P	P	neg	neg
Bangladesh	BK	BK-E343-02	2016-03-07	Labour Table	Labour table	ward furniture/surfaces	Ward Furniture/Surfaces	Y	Y	Y	P	neg	neg	neg
Bangladesh	BK	BK-E344	2016-11-04					Y	Y	Y	ND	neg	neg	neg
Bangladesh	BK	BK-E344-01	2016-03-08	Labour Table	Labour table	ward furniture/surfaces	Ward Furniture/Surfaces	Y	Y	Y	neg	P	neg	neg
Bangladesh	BK	BK-E345	2016-11-03					Y	Y	Y	ND	neg	neg	neg
Bangladesh	BK	BK-E345-01	2016-03-09	Baby Table	Baby's table	areas/objects around the baby	Patient's Zone	Y	Y	Y	neg	neg	neg	neg
Bangladesh	BK	BK-E346-01	2016-03-10	Penguine Sucker	suction bulb	mobile medical equipment	Mobile Medical Equipment	Y	Y	Y	neg	neg	neg	neg
Bangladesh	BK	BK-E348	2016-11-07					Y	Y	Y	ND	neg	neg	neg
Bangladesh	BK	BK-E349	2016-11-07					Y	Y	Y	ND	neg	neg	neg
Bangladesh	BK	BK-E350	2016-11-08					Y	Y	Y	ND	neg	neg	neg
Bangladesh	BK	BK-E350-01	2016-03-11	Labour Table	Labour table	ward furniture/surfaces	Ward Furniture/Surfaces	Y	Y	Y	neg	neg	neg	neg
Bangladesh	BK	BK-E351	2016-11-09					Y	Y	Y	ND	neg	neg	neg
Bangladesh	BK	BK-E352	2016-11-10					Y	Y	Y	ND	neg	neg	neg
Bangladesh	BK	BK-E352-01	2016-03-12	Baby Table	Baby's table	areas/objects around the baby	Patient's Zone	Y	Y	Y	P	neg	neg	neg
Bangladesh	BK	BK-E353	2016-11-11					Y	Y	Y	ND	neg	neg	neg
Bangladesh	BK	BK-E354	2016-11-11					Y	Y	Y	ND	neg	neg	neg
Bangladesh	BK	BK-E354-01	2016-03-13	Penguine Sucker	suction bulb	mobile medical equipment	Mobile Medical Equipment	Y	Y	Y	P	neg	neg	neg
Bangladesh	BK	BK-E355	2016-11-13					Y	Y	Y	ND	neg	neg	neg
Bangladesh	BK	BK-E355-01	2016-03-14	Basin	Basin	basin/sink	Sinks and Water System	Y	Y	Y	neg	neg	neg	neg
Bangladesh	BK	BK-E356	2016-11-13					Y	Y	Y	ND	P	neg	neg
Bangladesh	BK	BK-E356-01	2016-03-15	Penguine Sucker	suction bulb	mobile medical equipment	Mobile Medical Equipment	Y	Y	Y	neg	neg	neg	neg
Bangladesh	BK	BK-E357	2016-11-15					Y	Y	Y	ND	neg	neg	neg
Bangladesh	BK	BK-E357-01	2016-03-16	Baby Table	Baby's table	areas/objects around the baby	Patient's Zone	Y	Y	Y	neg	neg	neg	neg
Bangladesh	BK	BK-E358	2016-11-15					Y	Y	N	ND	NA	NA	NA
Bangladesh	BK	BK-E359	2016-11-16					Y	Y	Y	ND	P	neg	neg
Bangladesh	BK	BK-E360	2016-11-17					Y	Y	Y	ND	neg	neg	neg
Bangladesh	BK	BK-E361	2016-11-18					Y	Y	Y	ND	neg	neg	neg
Bangladesh	BK	BK-E361-01	2016-03-17	Labour Table	Labour table	ward furniture/surfaces	Ward Furniture/Surfaces	Y	Y	Y	neg	P	neg	neg
Bangladesh	BK	BK-E362	2016-11-20					Y	Y	Y	ND	neg	neg	neg
Bangladesh	BK	BK-E362-01	2016-03-18	Basin	Basin	basin/sink	Sinks and Water System	Y	Y	Y	neg	neg	neg	neg
Bangladesh	BK	BK-E363	2016-11-21					Y	Y	Y	ND	P	neg	neg
Bangladesh	BK	BK-E364	2016-10-22					Y	Y	Y	ND	neg	neg	neg
Bangladesh	BK	BK-E364-01	2016-03-19	Labour Table	Labour table	ward furniture/surfaces	Ward Furniture/Surfaces	Y	Y	Y	neg	neg	neg	neg
Bangladesh	BK	BK-E366	2016-10-22					Y	Y	Y	ND	neg	neg	neg
Bangladesh	BK	BK-E368	2016-11-24					Y	Y	Y	ND	neg	neg	neg
Bangladesh	BK	BK-E368-01	2016-03-20	Baby Table	Baby's table	areas/objects around the baby	Patient's Zone	Y	Y	Y	P	neg	neg	neg
Bangladesh	BK	BK-E372-01	2016-03-21	Labour Table	Labour table	ward furniture/surfaces	Ward Furniture/Surfaces	Y	Y	Y	neg	neg	neg	neg
Bangladesh	BK	BK-E374	2016-11-29					Y	Y	Y	ND	P	neg	neg
Bangladesh	BK	BK-E375	2016-11-30					Y	Y	Y	ND	P	neg	neg
Bangladesh	BK	BK-E375-01	2016-03-22	Baby tray	baby tray	mobile medical equipment	Mobile Medical Equipment	Y	Y	Y	neg	neg	neg	neg
Bangladesh	BK	BK-E375-02	2016-03-23	Baby Table	Baby's table	areas/objects around the baby	Patient's Zone	Y	Y	Y	neg	P	neg	neg
Bangladesh	BK	BK-E377-01	2016-03-24	Basin	Basin	basin/sink	Sinks and Water System	Y	Y	Y	neg	P	neg	neg
Bangladesh	BK	BK-E381	2016-12-05					Y	Y	Y	ND	P	neg	neg
Bangladesh	BK	BK-E384-01	2016-03-25	Penguine Sucker	suction bulb	mobile medical equipment	Mobile Medical Equipment	Y	Y	Y	neg	neg	neg	neg
Bangladesh	BK	BK-E387-01	2016-03-26	Labour Table	Labour table	ward furniture/surfaces	Ward Furniture/Surfaces	Y	Y	Y	neg	P	neg	neg
Bangladesh	BK	BK-E388-01	2016-03-27	Labour Table	Labour table	ward furniture/surfaces	Ward Furniture/Surfaces	Y	Y	Y	neg	neg	neg	neg
Bangladesh	BK	BK-E389	2016-12-13					Y	Y	Y	ND	neg	neg	neg
Bangladesh	BK	BK-E389-01	2016-03-28	Baby Table	Baby's table	areas/objects around the baby	Patient's Zone	Y	Y	Y	neg	neg	neg	neg
Bangladesh	BK	BK-E390-01	2016-03-29	Labour Table	Labour table	ward furniture/surfaces	Ward Furniture/Surfaces	Y	Y	Y	neg	neg	neg	neg
Bangladesh	BK	BK-E391-01	2016-03-30	Baby Table	Baby's table	areas/objects around the baby	Patient's Zone	Y	Y	Y	neg	neg	neg	neg
Bangladesh	BK	BK-E392	2016-12-15					Y	Y	Y	ND	P	neg	neg
Bangladesh	BK	BK-E393	2016-12-15					Y	Y	Y	ND	P	neg	neg
Bangladesh	BK	BK-E393-01	2016-03-31	Penguine Sucker	suction bulb	mobile medical equipment	Mobile Medical Equipment	Y	Y	Y	neg	neg	neg	neg
Bangladesh	BK	BK-E394	2016-12-17					Y	Y	Y	ND	P	neg	neg
Bangladesh	BK	BK-E395	2016-12-17					Y	Y	Y	ND	neg	neg	neg
Bangladesh	BK	BK-E396	2016-12-18					Y	Y	Y	ND	P	neg	neg
Bangladesh	BK	BK-E398	2016-12-20					Y	Y	Y	ND	neg	neg	neg
Bangladesh	BK	BK-E399	2016-12-20					Y	Y	Y	ND	P	neg	neg
Bangladesh	BK	BK-E403	2016-12-24					Y	Y	Y	ND	P	neg	neg
Bangladesh	BK	BK-E404	2016-12-26					Y	Y	Y	ND	P	neg	neg
Bangladesh	BK	BK-E405	2016-12-26					Y	Y	Y	ND	P	neg	neg
Bangladesh	BK	BK-E406	2016-12-28					Y	Y	Y	ND	P	neg	neg
Bangladesh	BK	BK-E407	2016-12-29					Y	Y	Y	ND	neg	neg	neg
Bangladesh	BK	BK-E408	2016-12-30					Y	Y	Y	ND	P	neg	neg
Bangladesh	BK	BK-E411	2017-01-01					Y	Y	Y	ND	P	neg	neg
Bangladesh	BK	BK-E413	2017-01-03					Y	Y	Y	ND	neg	neg	neg
Bangladesh	BK	BK-E414	2017-01-04					Y	Y	Y	ND	P	neg	neg
Bangladesh	BK	BK-E417	2017-01-07					N	N	N	NA	NA	NA	NA
Bangladesh	BK	BK-E420	2017-01-09					N	N	N	NA	NA	NA	NA
Bangladesh	BK	BK-E427	2017-01-15					N	N	N	NA	NA	NA	NA
Bangladesh	BK	BK-E428	2017-01-15					N	N	N	NA	NA	NA	NA
Bangladesh	BK	BK-E429	2017-01-17					Y	Y	Y	ND	neg	neg	neg
Bangladesh	BK	BK-E435	2017-01-24					N	N	N	NA	NA	NA	NA
Bangladesh	BK	BK-E437	2017-01-25					Y	N	N	NA	NA	NA	NA
Bangladesh	BK	BK-E438	2017-01-27					N	N	N	NA	NA	NA	NA
Bangladesh	BK	BK-E440	2017-01-29					Y	Y	Y	ND	neg	neg	neg
Bangladesh	BK	BK-E441	2017-01-29					N	N	N	NA	NA	NA	NA
Bangladesh	BK	BK-E442	2017-02-01					N	N	N	NA	NA	NA	NA
Bangladesh	BK	BK-E443	2017-02-02					Y	Y	Y	ND	neg	neg	neg
Bangladesh	BK	BK-E444	2017-02-02					Y	N	N	NA	NA	NA	NA
Bangladesh	BK	BK-E445	2017-02-04					N	N	N	NA	NA	NA	NA
Bangladesh	BK	BK-E447	2017-02-05					N	N	N	NA	NA	NA	NA
Bangladesh	BK	BK-E448	2017-02-06					Y	Y	Y	ND	P	neg	neg
Bangladesh	BK	BK-E449	2017-02-06					Y	Y	Y	ND	neg	neg	neg
Bangladesh	BK	BK-E450	2017-02-06					N	N	N	NA	NA	NA	NA
Bangladesh	BK	BK-E451	2017-02-08					Y	Y	Y	ND	neg	neg	neg
Bangladesh	BK	BK-E452	2017-02-09					Y	Y	Y	ND	neg	neg	neg
Bangladesh	BK	BK-E453	2017-02-09					Y	Y	Y	ND	neg	neg	neg
Bangladesh	BK	BK-E455	2017-02-12					N	N	N	NA	NA	NA	NA
Bangladesh	BK	BK-E456	2017-02-13					Y	Y	Y	ND	neg	neg	neg
Bangladesh	BK	BK-E457	2017-02-13					Y	Y	N	ND	NA	NA	NA
Bangladesh	BK	BK-E458	2017-02-14					Y	N	N	NA	NA	NA	NA
Bangladesh	BK	BK-E459	2017-02-16					N	N	N	NA	NA	NA	NA
Bangladesh	BK	BK-E460	2017-03-15					Y	N	N	NA	NA	NA	NA
Bangladesh	BK	BK-E461	2017-03-15					Y	Y	Y	ND	neg	neg	neg
Bangladesh	BK	BK-E462	2017-03-16					Y	Y	Y	ND	neg	neg	neg
Bangladesh	BK	BK-E464	2017-03-18					Y	Y	Y	ND	neg	neg	neg
Bangladesh	BK	BK-E465	2017-03-18					Y	Y	Y	ND	P	neg	neg
Bangladesh	BK	BK-E466	2017-03-18					Y	Y	Y	ND	P	neg	neg
Bangladesh	BK	BK-E467	2017-03-20					Y	Y	N	ND	NA	NA	NA
Bangladesh	BK	BK-E469	2017-03-21					Y	Y	Y	ND	neg	neg	neg
Bangladesh	BK	BK-E47-001	2015-11-30	Labour Table	Labour table	ward furniture/surfaces	Ward Furniture/Surfaces	Y	Y	Y	neg	neg	neg	neg
Bangladesh	BK	BK-E470	2017-03-22					N	N	N	NA	NA	NA	NA
Bangladesh	BK	BK-E471	2017-03-23					Y	Y	N	ND	NA	NA	NA
Bangladesh	BK	BK-E472	2017-03-23					Y	Y	Y	ND	neg	neg	neg
Bangladesh	BK	BK-E473	2017-03-25					N	N	N	NA	NA	NA	NA
Bangladesh	BK	BK-E474	2017-03-25					Y	Y	Y	ND	neg	neg	neg
Bangladesh	BK	BK-E475	2017-03-27					N	N	N	NA	NA	NA	NA
Bangladesh	BK	BK-E476	2017-03-27					Y	Y	Y	ND	neg	neg	neg
Bangladesh	BK	BK-E478	2017-03-29					Y	Y	Y	ND	neg	neg	neg
Bangladesh	BK	BK-E480	2017-03-31					Y	Y	Y	ND	neg	neg	neg
Bangladesh	BK	BK-E481	2017-03-31					Y	Y	Y	ND	neg	neg	neg
Bangladesh	BK	BK-E484	2017-04-04					Y	Y	Y	ND	neg	neg	neg
Bangladesh	BK	BK-E486	2017-04-05					Y	Y	Y	ND	neg	neg	neg
Bangladesh	BK	BK-E490	2017-04-09					Y	Y	Y	ND	neg	neg	neg
Bangladesh	BK	BK-E491	2017-04-09					Y	Y	Y	ND	neg	neg	neg
Bangladesh	BK	BK-E492	2017-04-10					Y	Y	Y	ND	P	neg	neg
Bangladesh	BK	BK-E494	2017-04-11					Y	Y	Y	ND	neg	neg	neg
Bangladesh	BK	BK-E496	2017-04-12					Y	Y	Y	ND	neg	neg	neg
Bangladesh	BK	BK-E50-001	2015-12-02	Baby Management Table	Baby's table	areas/objects around the baby	Patient's Zone	Y	Y	Y	neg	neg	neg	neg
Bangladesh	BK	BK-E504	2017-04-20					Y	Y	Y	ND	P	neg	neg
Bangladesh	BK	BK-E505	2017-04-21					Y	Y	Y	ND	neg	neg	neg
Bangladesh	BK	BK-E506	2017-04-21					Y	Y	Y	ND	P	neg	neg
Bangladesh	BK	BK-E508	2017-04-24					Y	Y	Y	ND	neg	neg	neg
Bangladesh	BK	BK-E511	2017-04-26					Y	Y	Y	ND	neg	neg	neg
Bangladesh	BK	BK-E512	2017-04-27					Y	Y	Y	ND	neg	neg	neg
Bangladesh	BK	BK-E513	2017-04-28					Y	Y	Y	ND	neg	neg	neg
Bangladesh	BK	BK-E515	2017-04-29					Y	Y	Y	ND	P	neg	neg
Bangladesh	BK	BK-E516	2017-05-01					Y	Y	Y	ND	neg	neg	neg
Bangladesh	BK	BK-E517	2017-05-02					Y	Y	Y	ND	neg	neg	neg
Bangladesh	BK	BK-E518	2017-05-03					Y	Y	N	ND	NA	NA	NA
Bangladesh	BK	BK-E519	2017-05-03					Y	Y	Y	ND	neg	neg	neg
Bangladesh	BK	BK-E520	2017-05-05					Y	Y	Y	ND	neg	neg	neg
Bangladesh	BK	BK-E521	2017-05-06					Y	Y	N	ND	NA	NA	NA
Bangladesh	BK	BK-E522	2017-05-07					Y	Y	Y	ND	neg	neg	neg
Bangladesh	BK	BK-E523	2017-05-07					Y	Y	Y	ND	neg	neg	neg
Bangladesh	BK	BK-E524	2017-05-07					Y	Y	Y	ND	neg	neg	neg
Bangladesh	BK	BK-E525	2017-05-08					Y	Y	Y	ND	P	neg	neg
Bangladesh	BK	BK-E526	2017-05-09					Y	Y	Y	ND	neg	neg	neg
Bangladesh	BK	BK-E527	2017-05-09					Y	Y	N	ND	NA	NA	NA
Bangladesh	BK	BK-E528	2017-05-10					Y	Y	Y	ND	neg	neg	neg
Bangladesh	BK	BK-E529	2017-05-10					Y	Y	Y	ND	neg	neg	neg
Bangladesh	BK	BK-E53-001	2015-12-03	Penguine Sucker	suction bulb	mobile medical equipment	Mobile Medical Equipment	Y	Y	Y	neg	neg	neg	neg
Bangladesh	BK	BK-E530	2017-05-10					Y	Y	Y	ND	neg	neg	neg
Bangladesh	BK	BK-E531	2017-05-12					Y	Y	Y	ND	P	neg	neg
Bangladesh	BK	BK-E533	2017-05-14					Y	Y	Y	ND	P	neg	neg
Bangladesh	BK	BK-E535	2017-05-15					Y	Y	Y	neg	neg	neg	neg
Bangladesh	BK	BK-E536	2017-05-17					Y	Y	Y	ND	neg	neg	neg
Bangladesh	BK	BK-E537	2017-05-18					Y	Y	N	ND	NA	NA	NA
Bangladesh	BK	BK-E538	2017-05-18					Y	Y	Y	ND	neg	neg	neg
Bangladesh	BK	BK-E540	2017-05-20					Y	Y	Y	ND	P	neg	neg
Bangladesh	BK	BK-E541	2017-05-21					N	N	N	NA	NA	NA	NA
Bangladesh	BK	BK-E542	2017-05-22					Y	Y	Y	ND	neg	neg	neg
Bangladesh	BK	BK-E543	2017-05-23					Y	Y	Y	ND	neg	neg	neg
Bangladesh	BK	BK-E544	2017-05-23					Y	Y	Y	ND	neg	neg	neg
Bangladesh	BK	BK-E545	2017-05-24					Y	Y	Y	ND	P	neg	neg
Bangladesh	BK	BK-E546	2017-05-24					Y	Y	Y	ND	neg	neg	neg
Bangladesh	BK	BK-E547	2017-05-26					Y	Y	Y	ND	neg	neg	neg
Bangladesh	BK	BK-E548	2017-05-27					Y	Y	Y	ND	neg	neg	neg
Bangladesh	BK	BK-E549	2017-05-27					N	N	N	NA	NA	NA	NA
Bangladesh	BK	BK-E550	2017-05-28					Y	Y	Y	ND	P	neg	neg
Bangladesh	BK	BK-E551	2017-05-29					Y	Y	Y	ND	P	neg	neg
Bangladesh	BK	BK-E553	2017-05-30					Y	Y	Y	ND	P	neg	neg
Bangladesh	BK	BK-E554	2017-05-31					Y	Y	Y	ND	P	neg	neg
Bangladesh	BK	BK-E555	2017-05-31					Y	Y	Y	ND	neg	neg	neg
Bangladesh	BK	BK-E556	2017-06-01					Y	Y	Y	ND	P	neg	neg
Bangladesh	BK	BK-E557	2017-06-01					Y	Y	Y	ND	P	neg	neg
Bangladesh	BK	BK-E558	2017-06-01					Y	Y	Y	ND	neg	neg	neg
Bangladesh	BK	BK-E559	2017-06-01					Y	Y	Y	ND	P	neg	neg
Bangladesh	BK	BK-E560	2017-06-03					Y	Y	Y	ND	P	neg	neg
Bangladesh	BK	BK-E561	2017-06-03					Y	Y	Y	ND	neg	neg	neg
Bangladesh	BK	BK-E562	2017-06-04					Y	Y	Y	ND	P	neg	neg
Bangladesh	BK	BK-E563	2017-06-04					Y	Y	Y	ND	P	neg	neg
Bangladesh	BK	BK-E564	2017-06-05					Y	N	Y	NA	ND	ND	ND
Bangladesh	BK	BK-E565	ND					Y	Y	Y	ND	neg	neg	neg
Bangladesh	BK	BK-E566						Y	Y	Y	ND	P	neg	neg
Bangladesh	BK	BK-E570	2017-06-07					Y	Y	Y	ND	neg	neg	neg
Bangladesh	BK	BK-E571	2017-06-07					Y	Y	Y	ND	P	neg	neg
Bangladesh	BK	BK-E572	2017-06-08					N	N	N	NA	NA	NA	NA
Bangladesh	BK	BK-E573	2017-06-08					Y	Y	Y	ND	neg	neg	neg
Bangladesh	BK	BK-E574	2017-06-08					Y	Y	Y	ND	P	neg	neg
Bangladesh	BK	BK-E577	2017-06-10					Y	Y	Y	ND	neg	neg	neg
Bangladesh	BK	BK-E578	2017-06-10					Y	Y	Y	ND	neg	neg	neg
Bangladesh	BK	BK-E579	2017-06-10					Y	Y	Y	ND	P	neg	P
Bangladesh	BK	BK-E580	2017-06-11					Y	Y	Y	ND	P	neg	neg
Bangladesh	BK	BK-E583	2017-06-14					Y	Y	Y	ND	neg	neg	neg
Bangladesh	BK	BK-E584	2017-06-14					Y	Y	Y	ND	P	neg	neg
Bangladesh	BK	BK-E590	2017-06-17					N	N	N	NA	NA	NA	NA
Bangladesh	BK	BK-E591	2017-06-17					Y	Y	Y	ND	P	neg	neg
Bangladesh	BK	BK-E592	2017-06-18					Y	Y	Y	ND	neg	neg	neg
Bangladesh	BK	BK-E593	2017-06-18					Y	Y	Y	ND	neg	neg	neg
Bangladesh	BK	BK-E594	2017-06-19					Y	Y	Y	ND	P	neg	neg
Bangladesh	BK	BK-E595	2017-06-19					N	N	N	NA	NA	NA	NA
Bangladesh	BK	BK-E596	2017-06-20					Y	Y	Y	ND	neg	neg	neg
Bangladesh	BK	BK-E597	2017-06-20					Y	Y	Y	ND	neg	neg	neg
Bangladesh	BK	BK-E600	2017-06-21					Y	Y	Y	ND	neg	neg	neg
Bangladesh	BK	BK-E602	2017-06-22					Y	Y	Y	ND	neg	neg	neg
Bangladesh	BK	BK-E603	2017-06-22					Y	Y	Y	ND	neg	neg	neg
Bangladesh	BK	BK-E605	2017-06-24					Y	Y	Y	ND	neg	neg	neg
Bangladesh	BK	BK-E606	2017-06-25					Y	Y	Y	ND	neg	neg	neg
Bangladesh	BK	BK-E607	2017-06-25					Y	Y	Y	ND	neg	neg	neg
Bangladesh	BK	BK-E608	2017-06-25					Y	N	Y	NA	ND	ND	ND
Bangladesh	BK	BK-E609	2017-06-27					Y	Y	Y	ND	P	neg	neg
Bangladesh	BK	BK-E610	2017-06-27					Y	Y	Y	ND	neg	neg	neg
Bangladesh	BK	BK-E611	2017-06-28					Y	Y	Y	ND	neg	neg	neg
Bangladesh	BK	BK-E612	2017-06-28					Y	Y	Y	ND	P	neg	neg
Bangladesh	BK	BK-E613	2017-06-29					Y	Y	Y	ND	P	neg	neg
Bangladesh	BK	BK-E614	2017-06-28					Y	Y	Y	ND	neg	neg	neg
Bangladesh	BK	BK-E615	2017-06-29					Y	Y	Y	ND	neg	neg	neg
Bangladesh	BK	BK-E616	2017-07-03					Y	Y	Y	ND	neg	neg	neg
Bangladesh	BK	BK-E617	2017-07-02					N	N	N	NA	NA	NA	NA
Bangladesh	BK	BK-E618	2017-07-01					Y	Y	Y	ND	neg	neg	neg
Bangladesh	BK	BK-E619	2017-07-03					Y	Y	Y	ND	neg	neg	neg
Bangladesh	BK	BK-E62-001	2015-12-05	Baby Management Table	Baby's table	areas/objects around the baby	Patient's Zone	Y	Y	Y	neg	neg	neg	neg
Bangladesh	BK	BK-E620	2017-07-03					Y	Y	Y	ND	neg	neg	neg
Bangladesh	BK	BK-E621	2017-07-03					Y	Y	Y	ND	neg	neg	neg
Bangladesh	BK	BK-E622	2017-07-03					N	N	N	NA	NA	NA	NA
Bangladesh	BK	BK-E624	2017-07-05					N	N	N	NA	NA	NA	NA
Bangladesh	BK	BK-E625	2017-07-04					Y	Y	Y	ND	neg	neg	neg
Bangladesh	BK	BK-E627	2017-07-06					Y	Y	Y	ND	neg	neg	neg
Bangladesh	BK	BK-E628	2017-07-07					Y	Y	Y	ND	neg	neg	neg
Bangladesh	BK	BK-E630	2017-07-08					Y	Y	Y	ND	neg	neg	neg
Bangladesh	BK	BK-E631	2017-07-08					Y	Y	Y	ND	neg	neg	neg
Bangladesh	BK	BK-E632	2017-07-09					Y	Y	Y	ND	P	neg	neg
Bangladesh	BK	BK-E634	2017-07-09					Y	Y	Y	ND	neg	neg	neg
Bangladesh	BK	BK-E635	2017-07-09					Y	Y	Y	ND	neg	neg	neg
Bangladesh	BK	BK-E636	2017-07-10					Y	Y	Y	ND	neg	neg	neg
Bangladesh	BK	BK-E640	2017-07-13					Y	Y	Y	ND	neg	neg	neg
Bangladesh	BK	BK-E641	2017-07-14					Y	Y	Y	ND	neg	neg	neg
Bangladesh	BK	BK-E642	2017-07-15					Y	Y	Y	ND	neg	neg	neg
Bangladesh	BK	BK-E643	2017-07-16					Y	Y	Y	ND	neg	neg	neg
Bangladesh	BK	BK-E647	2017-07-17					Y	Y	Y	ND	neg	neg	neg
Bangladesh	BK	BK-E670	2017-08-02					Y	Y	Y	ND	P	neg	neg
Bangladesh	BK	BK-E674	2017-08-05					Y	N	Y	NA	ND	ND	ND
Bangladesh	BK	BK-E675	2017-08-05					Y	Y	Y	ND	P	neg	neg
Bangladesh	BK	BK-E676	2017-08-06					Y	Y	Y	ND	P	neg	neg
Bangladesh	BK	BK-E678	2017-08-08					Y	Y	Y	ND	P	neg	neg
Bangladesh	BK	BK-E68-001	2015-12-06	Side- Labour Table	Labour table	ward furniture/surfaces	Ward Furniture/Surfaces	Y	Y	Y	neg	neg	neg	neg
Bangladesh	BK	BK-E680	2017-08-09					Y	Y	Y	ND	P	neg	neg
Bangladesh	BK	BK-E682	2017-08-10					Y	Y	Y	ND	neg	neg	neg
Bangladesh	BK	BK-E684	2017-08-12					Y	Y	Y	ND	P	neg	neg
Bangladesh	BK	BK-E685	2017-08-12					Y	N	N	NA	NA	NA	NA
Bangladesh	BK	BK-E686	2017-08-13					Y	Y	Y	ND	neg	neg	neg
Bangladesh	BK	BK-E688	2017-08-15					Y	Y	Y	ND	neg	neg	neg
Bangladesh	BK	BK-E689	2017-08-16					Y	N	N	NA	NA	NA	NA
Bangladesh	BK	BK-E690	2017-08-16					Y	Y	Y	ND	neg	neg	neg
Bangladesh	BK	BK-E693	2017-08-19					Y	Y	Y	ND	neg	neg	neg
Bangladesh	BK	BK-E694	2017-08-19					Y	Y	Y	ND	P	neg	neg
Bangladesh	BK	BK-E695	2017-08-19					Y	Y	Y	ND	P	neg	neg
Bangladesh	BK	BK-E696	2017-08-20					Y	N	Y	NA	ND	ND	ND
Bangladesh	BK	BK-E700	2017-08-23					Y	N	N	NA	NA	NA	NA
Bangladesh	BK	BK-E701	2017-08-24					Y	Y	Y	ND	neg	neg	neg
Bangladesh	BK	BK-E702	2017-08-24					Y	Y	Y	ND	neg	neg	neg
Bangladesh	BK	BK-E703	2017-08-25					Y	N	N	NA	NA	NA	NA
Bangladesh	BK	BK-E704	2017-08-26					Y	Y	Y	ND	neg	neg	neg
Bangladesh	BK	BK-E705	2017-08-26					Y	Y	Y	ND	neg	neg	neg
Bangladesh	BK	BK-E706	2017-08-26					Y	N	N	NA	NA	NA	NA
Bangladesh	BK	BK-E707	2017-08-26					Y	Y	Y	ND	neg	neg	neg
Bangladesh	BK	BK-E708	2017-08-28					Y	Y	Y	ND	neg	neg	neg
Bangladesh	BK	BK-E709	2017-08-28					Y	Y	Y	ND	neg	neg	neg
Bangladesh	BK	BK-E71-001	2015-12-07	Penguine Sucker	suction bulb	mobile medical equipment	Mobile Medical Equipment	Y	Y	Y	neg	neg	neg	neg
Bangladesh	BK	BK-E710	2017-08-29					Y	Y	Y	ND	neg	neg	neg
Bangladesh	BK	BK-E711	2017-08-30					Y	Y	Y	ND	neg	neg	neg
Bangladesh	BK	BK-E712	2017-08-30					Y	Y	Y	ND	neg	neg	neg
Bangladesh	BK	BK-E713	2017-08-31					Y	Y	Y	ND	neg	neg	neg
Bangladesh	BK	BK-E714	2017-09-01					Y	Y	N	ND	NA	NA	NA
Bangladesh	BK	BK-E715	2017-09-03					Y	Y	Y	ND	neg	neg	neg
Bangladesh	BK	BK-E716	2017-09-03					Y	Y	Y	ND	neg	neg	neg
Bangladesh	BK	BK-E717	2017-09-03					Y	Y	Y	ND	neg	neg	neg
Bangladesh	BK	BK-E718	2017-09-04					Y	Y	Y	ND	neg	neg	neg
Bangladesh	BK	BK-E719	2017-09-04					Y	Y	Y	ND	neg	neg	neg
Bangladesh	BK	BK-E720	2017-09-04					Y	Y	Y	ND	neg	neg	neg
Bangladesh	BK	BK-E721	2017-09-05					N	N	N	NA	NA	NA	NA
Bangladesh	BK	BK-E722	2017-09-06					Y	Y	Y	ND	neg	neg	neg
Bangladesh	BK	BK-E723	2017-09-07					Y	Y	Y	ND	neg	neg	neg
Bangladesh	BK	BK-E726	2017-09-09					Y	Y	Y	ND	neg	neg	neg
Bangladesh	BK	BK-E727	2017-09-10					Y	Y	Y	ND	neg	neg	neg
Bangladesh	BK	BK-E728	2017-09-10					Y	Y	Y	ND	neg	neg	neg
Bangladesh	BK	BK-E729	2017-09-11					N	N	N	NA	NA	NA	NA
Bangladesh	BK	BK-E730	2017-09-12					Y	Y	Y	ND	P	neg	neg
Bangladesh	BK	BK-E731	2017-09-12					Y	Y	Y	ND	neg	neg	neg
Bangladesh	BK	BK-E732	2017-09-12					N	N	N	NA	NA	NA	NA
Bangladesh	BK	BK-E733	2017-09-13					Y	Y	Y	ND	neg	neg	neg
Bangladesh	BK	BK-E734	2017-09-14					Y	Y	Y	ND	neg	neg	neg
Bangladesh	BK	BK-E735	2017-09-15					N	N	N	NA	NA	NA	NA
Bangladesh	BK	BK-E736	2017-09-16					Y	Y	N	ND	NA	NA	NA
Bangladesh	BK	BK-E737	2017-09-17					Y	Y	Y	ND	neg	neg	neg
Bangladesh	BK	BK-E738	2017-09-17					Y	N	N	NA	NA	NA	NA
Bangladesh	BK	BK-E739	2017-09-18					Y	Y	Y	ND	neg	neg	neg
Bangladesh	BK	BK-E740	2017-09-19					Y	Y	Y	ND	neg	neg	neg
Bangladesh	BK	BK-E741	2017-09-20					Y	Y	Y	ND	neg	neg	neg
Bangladesh	BK	BK-E746	2017-09-24					Y	Y	Y	ND	neg	neg	neg
Bangladesh	BK	BK-E747	2017-09-25					Y	Y	N	ND	NA	NA	NA
Bangladesh	BK	BK-E749	2017-09-26					Y	Y	Y	ND	neg	neg	neg
Bangladesh	BK	BK-E751	2017-09-28					Y	Y	Y	ND	P	neg	neg
Bangladesh	BK	BK-E752	2017-09-28					Y	Y	Y	ND	neg	neg	neg
Bangladesh	BK	BK-E756	2017-10-02					Y	Y	Y	ND	neg	neg	neg
Bangladesh	BK	BK-E757	2017-10-03					Y	Y	Y	ND	neg	neg	neg
Bangladesh	BK	BK-E758	2017-10-04					Y	Y	Y	ND	P	neg	neg
Bangladesh	BK	BK-E759	2017-10-04					Y	Y	Y	ND	neg	neg	neg
Bangladesh	BK	BK-E76-001	2015-12-08	Labour Table	Labour table	ward furniture/surfaces	Ward Furniture/Surfaces	Y	Y	Y	neg	neg	neg	neg
Bangladesh	BK	BK-E763	2017-10-08					Y	Y	Y	ND	neg	neg	neg
Bangladesh	BK	BK-E764	2017-10-08					Y	Y	Y	ND	neg	neg	neg
Bangladesh	BK	BK-E769	2017-10-11					Y	Y	Y	ND	neg	neg	neg
Bangladesh	BK	BK-E771	2017-10-12					N	N	N	NA	NA	NA	NA
Bangladesh	BK	BK-E772	2017-10-13					N	N	N	NA	NA	NA	NA
Bangladesh	BK	BK-E773	2017-10-14					Y	Y	Y	ND	neg	neg	neg
Bangladesh	BK	BK-E774	2017-10-15					Y	Y	Y	ND	neg	neg	neg
Bangladesh	BK	BK-E775	2017-10-15					Y	Y	Y	ND	neg	neg	neg
Bangladesh	BK	BK-E776	2017-10-16					Y	Y	Y	ND	neg	neg	neg
Bangladesh	BK	BK-E777	2017-10-16					Y	Y	Y	ND	neg	neg	neg
Bangladesh	BK	BK-E778	2017-10-17					Y	Y	Y	ND	P	neg	neg
Bangladesh	BK	BK-E779	2017-10-17					Y	Y	Y	ND	P	neg	neg
Bangladesh	BK	BK-E780	2017-10-18					Y	Y	Y	ND	neg	neg	neg
Bangladesh	BK	BK-E781	2017-10-18					Y	Y	Y	ND	neg	neg	neg
Bangladesh	BK	BK-E782	2017-10-18					Y	Y	Y	ND	neg	neg	neg
Bangladesh	BK	BK-E784	2017-10-20					Y	Y	Y	ND	neg	neg	neg
Bangladesh	BK	BK-E785	2017-10-20					Y	Y	Y	ND	neg	neg	neg
Bangladesh	BK	BK-E787	2017-10-22					N	N	N	NA	NA	NA	NA
Bangladesh	BK	BK-E788	2017-10-22					Y	Y	Y	ND	neg	neg	neg
Bangladesh	BK	BK-E789	2017-10-23					Y	Y	Y	ND	neg	neg	neg
Bangladesh	BK	BK-E790	2017-10-24					N	N	N	NA	NA	NA	NA
Bangladesh	BK	BK-E791	2017-10-25					Y	Y	Y	ND	neg	neg	neg
Bangladesh	BK	BK-E792	2017-10-24					Y	Y	Y	ND	neg	neg	neg
Bangladesh	BK	BK-E793	2017-10-26					Y	Y	Y	ND	P	neg	neg
Bangladesh	BK	BK-E794	2017-10-27					Y	Y	Y	ND	neg	neg	neg
Bangladesh	BK	BK-E795	2017-10-27					Y	Y	Y	ND	neg	neg	neg
Bangladesh	BK	BK-E798	2017-10-29					Y	Y	Y	ND	neg	neg	neg
Bangladesh	BK	BK-E799	2017-10-29					Y	Y	Y	ND	neg	neg	neg
Bangladesh	BK	BK-E800	2017-10-30					Y	Y	Y	ND	neg	neg	neg
Bangladesh	BK	BK-E801	2017-10-31					N	N	N	NA	NA	NA	NA
Bangladesh	BK	BK-E803	2017-10-31					Y	Y	Y	ND	neg	neg	neg
Bangladesh	BK	BK-E805	2017-11-01					N	N	N	NA	NA	NA	NA
Bangladesh	BK	BK-E806	2017-11-02					N	N	N	NA	NA	NA	NA
Bangladesh	BK	BK-E807	2017-11-02					Y	Y	Y	ND	neg	neg	neg
Bangladesh	BK	BK-E808	2017-11-04					Y	Y	Y	ND	neg	neg	neg
Bangladesh	BK	BK-E810	2017-11-06					Y	Y	Y	ND	neg	neg	neg
Bangladesh	BK	BK-E811	2017-11-07					Y	Y	Y	ND	neg	neg	neg
Bangladesh	BK	BK-E812	2017-11-08					Y	Y	N	ND	NA	NA	NA
Bangladesh	BK	BK-E815	2017-11-11					N	N	N	NA	NA	NA	NA
Bangladesh	BK	BK-E817	2017-11-12					Y	Y	Y	ND	neg	neg	neg
Bangladesh	BK	BK-E819	2017-11-13					Y	Y	Y	ND	P	neg	neg
Bangladesh	BK	BK-E820	2017-11-14					Y	Y	Y	ND	neg	neg	neg
Bangladesh	BK	BK-E821	2017-11-14					Y	Y	Y	ND	P	neg	neg
Bangladesh	BK	BK-E824	2017-11-16					Y	Y	Y	ND	P	neg	neg
Bangladesh	BK	BK-E825	2017-11-16					Y	Y	Y	ND	P	neg	neg
Bangladesh	BK	BK-E826	2017-11-17					Y	Y	Y	ND	P	neg	neg
Bangladesh	BK	BK-E829	2017-11-18					Y	Y	Y	ND	P	neg	neg
Bangladesh	BK	BK-E830	2017-11-19					Y	Y	Y	ND	P	neg	neg
Bangladesh	BK	BK-E831	2017-11-19					Y	Y	Y	ND	P	neg	neg
Bangladesh	BK	BK-E832	2017-11-20					Y	Y	Y	ND	P	neg	neg
Bangladesh	BK	BK-E836	2017-11-23					Y	Y	Y	ND	P	neg	neg
Bangladesh	BK	BK-E837	2017-11-23					Y	Y	Y	ND	P	neg	neg
Bangladesh	BK	BK-E838	2017-11-23					Y	Y	Y	ND	P	neg	neg
Bangladesh	BK	BK-E839						Y	Y	Y	ND	neg	neg	neg
Bangladesh	BK	BK-E843	2017-11-28					Y	Y	Y	ND	neg	neg	neg
Bangladesh	BK	BK-E847	2017-12-01					Y	Y	Y	ND	neg	neg	neg
Bangladesh	BK	BK-E848	2017-12-02					Y	Y	Y	ND	neg	neg	neg
Bangladesh	BK	BK-E85-001	2015-12-11	Labour Table	Labour table	ward furniture/surfaces	Ward Furniture/Surfaces	Y	Y	Y	neg	neg	neg	neg
Bangladesh	BK	BK-E97-001	2015-12-15	Patient's bed	Bed	ward furniture/surfaces	Patient's Zone	Y	Y	Y	neg	neg	neg	neg
Bangladesh	BK	BK-E98-001	2015-12-15	Patient's bed	Bed	ward furniture/surfaces	Patient's Zone	Y	Y	Y	neg	neg	neg	neg
Ethiopia	ES	ESI-E0001	2017-08-01	Sink	Sink	basin/sink	Sinks and Water System	Y	Y	Y	P	neg	neg	P
Ethiopia	ES	ESI-E0002	2017-08-02	Baby corner(bed)	Baby's corner	areas/objects around the baby	Patient's Zone	N	N	N	NA	NA	NA	NA
Ethiopia	ES	ESI-E0003	2017-08-05	Delivery Couch	Delivery couch	ward furniture/surfaces	Ward Furniture/Surfaces	N	N	N	NA	NA	NA	NA
Ethiopia	ES	ESI-E0004	2017-10-16	Delivery rubber sheet	Delivery sheet	ward furniture/surfaces	Ward Furniture/Surfaces	N	N	N	NA	NA	NA	NA
Ethiopia	ES	ESI-E0005	2017-08-15	Delivery Couch	Delivery couch	ward furniture/surfaces	Ward Furniture/Surfaces	Y	Y	Y	neg	neg	neg	neg
Ethiopia	ES	ESI-E0006	2017-08-16	Weight scale	weighing scale	weighing scale/measuring tape	Patient's Zone	Y	Y	Y	neg	neg	neg	neg
Ethiopia	ES	ESI-E0007	2017-08-28	CTG	Cardiotocography monitor	monitors	Mobile Medical Equipment	N	N	N	NA	NA	NA	NA
Ethiopia	ES	ESI-E0008	2017-08-23	Suction machine	medical suction machine	mobile medical equipment	Mobile Medical Equipment	Y	N	Y	NA	neg	neg	neg
Ethiopia	ES	ESI-E0009	2017-08-15	IV stand	intravenous (IV) line and accessories	medical equipment	Medical Equipment	N	N	N	NA	NA	NA	NA
Ethiopia	ES	ESI-E0010	2017-08-19	Sink	Sink	basin/sink	Sinks and Water System	Y	Y	Y	neg	neg	neg	neg
Ethiopia	ES	ESI-E0011	2017-08-20	Radiant water	Radiant warmer's water	radiant warmers& resuscitation room	Emergency Neonatal Care	N	N	N	NA	NA	NA	NA
Ethiopia	ES	ESI-E0012	2017-08-21	Weight scale	weighing scale	weighing scale/measuring tape	Patient's Zone	Y	Y	Y	neg	neg	neg	neg
Ethiopia	ES	ESI-E0013	2017-08-23	Fetoscope	Fetoscope	medical equipment	Medical Equipment	N	N	N	NA	NA	NA	NA
Ethiopia	ES	ESI-E0014	2017-08-24	Delivery Couch	Delivery couch	ward furniture/surfaces	Ward Furniture/Surfaces	N	N	N	NA	NA	NA	NA
Ethiopia	ES	ESI-E0015	2017-08-25	Baby corner(bed)	Baby's corner	areas/objects around the baby	Patient's Zone	N	N	N	NA	NA	NA	NA
Ethiopia	ES	ESI-E0016	2017-08-26	trolley	Trolley	mobile medical equipment	Mobile Medical Equipment	N	N	N	NA	NA	NA	NA
Ethiopia	ES	ESI-E0017	2017-09-01	CTG	Cardiotocography monitor	monitors	Mobile Medical Equipment	Y	Y	Y	P	neg	neg	neg
Ethiopia	ES	ESI-E0018	2017-09-02	IV stand	intravenous (IV) line and accessories	medical equipment	Medical Equipment	N	N	N	NA	NA	NA	NA
Ethiopia	ES	ESI-E0019	2017-09-03	Sink	Sink	basin/sink	Sinks and Water System	Y	Y	Y	neg	neg	neg	neg
Ethiopia	ES	ESI-E0020	2017-09-04	Instrument Processing area	NA			N	N	N	NA	NA	NA	NA
Ethiopia	ES	ESI-E0021	2017-09-12	Baby wt scale	Baby weighing scale	weighing scale/measuring tape	Patient's Zone	N	N	N	NA	NA	NA	NA
Ethiopia	ES	ESI-E0022	2017-10-16	Bed	Bed	ward furniture/surfaces	Patient's Zone	N	N	N	NA	NA	NA	NA
Ethiopia	ES	ESI-E0023	2017-10-17	Medication Tray	medication tray	mobile medical equipment	Mobile Medical Equipment	Y	N	Y	NA	neg	neg	neg
Ethiopia	ES	ESI-E0024	2017-09-16	Sink	Sink	basin/sink	Sinks and Water System	Y	Y	Y	neg	neg	neg	P
Ethiopia	ES	ESI-E0025	2017-10-17	CTG	Cardiotocography monitor	monitors	Mobile Medical Equipment	Y	N	Y	NA	neg	neg	neg
Ethiopia	ES	ESI-E0026	2017-10-17	Bed screen	Bed screen	ward furniture/surfaces	Patient's Zone	N	N	N	NA	NA	NA	NA
Ethiopia	ES	ESI-E0027	2017-10-19	IV LINE	intravenous (IV) line and accessories	medical equipment	Medical Equipment	Y	Y	Y	neg	neg	neg	neg
Ethiopia	ES	ESI-E0028	2017-10-19	Sink	Sink	basin/sink	Sinks and Water System	Y	Y	Y	P	neg	neg	neg
Ethiopia	ES	ESI-E0029	2017-10-19	Bed linen	Bed linen	ward furniture/surfaces	Patient's Zone	Y	Y	Y	neg	neg	neg	neg
Ethiopia	ES	ESI-E0030	2017-10-20	Mobile light stand	Mobile light stand	ward furniture/surfaces	Ward Furniture/Surfaces	N	N	N	NA	NA	NA	NA
Ethiopia	ES	ESI-E0031	2017-10-21	Oxygen gage	Oxygen gauge	Oxygen therapy	Mobile Medical Equipment	N	N	N	NA	NA	NA	NA
Ethiopia	ES	ESI-E0032	2017-09-15	Delivery Couch	Delivery couch	ward furniture/surfaces	Ward Furniture/Surfaces	N	N	N	NA	NA	NA	NA
Ethiopia	ES	ESI-E0033	2017-10-09	Delivery Couch	Delivery couch	ward furniture/surfaces	Ward Furniture/Surfaces	N	N	N	NA	NA	NA	NA
Ethiopia	ES	ESI-E0034	2017-10-10	Weight scale	weighing scale	weighing scale/measuring tape	Patient's Zone	Y	Y	Y	neg	neg	neg	neg
Ethiopia	ES	ESI-E0035	2017-10-21	Radiant warmer	Radiant warmer	radiant warmers& resuscitation room	Emergency Neonatal Care	N	N	N	NA	NA	NA	NA
Ethiopia	ES	ESI-E0036	2017-10-21	Curtain	Curtain	ward furniture/surfaces	Ward Furniture/Surfaces	Y	N	Y	NA	neg	neg	neg
Ethiopia	ES	ESI-E0037	2017-10-07	trolley	Trolley	mobile medical equipment	Mobile Medical Equipment	Y	N	Y	NA	neg	neg	neg
Ethiopia	ES	ESI-E0038	2017-10-08	weight scale	weighing scale	weighing scale/measuring tape	Patient's Zone	Y	N	Y	NA	neg	neg	neg
Ethiopia	ES	ESI-E0039	2017-10-15	Adhesive plaster	NA			N	N	N	NA	NA	NA	NA
Ethiopia	ES	ESI-E0040	2017-10-23	Bed screen	Bed screen	ward furniture/surfaces	Patient's Zone	Y	N	Y	NA	neg	neg	neg
Ethiopia	ES	ESI-E0041	2017-10-23	Bed mattres	Mattress	ward furniture/surfaces	Ward Furniture/Surfaces	N	N	N	NA	NA	NA	NA
Ethiopia	ES	ESI-E0042	2017-10-23	Hand hanger	Hanger	ward furniture/surfaces	Ward Furniture/Surfaces	N	N	N	NA	NA	NA	NA
Ethiopia	ES	ESI-E0043	2017-10-30	Radiant warmer	Radiant warmer	radiant warmers& resuscitation room	Emergency Neonatal Care	N	N	N	NA	NA	NA	NA
Ethiopia	ES	ESI-E0044	2017-10-30	Tap water	Tap water	ward furniture/surfaces	Sinks and Water System	N	N	N	NA	NA	NA	NA
Ethiopia	ES	ESI-E45	2017-11-04	Tap water	Tap water	ward furniture/surfaces	Sinks and Water System	N	N	N	NA	NA	NA	NA
Ethiopia	ES	ESI-E46	2017-11-04	Baby face mask	baby face mask	mobile medical equipment	Mobile Medical Equipment	N	N	N	NA	NA	NA	NA
Ethiopia	ES	ESI-E47	2017-11-06	Tap water	Tap water	ward furniture/surfaces	Sinks and Water System	N	N	N	NA	NA	NA	NA
Ethiopia	ES	ESI-E48	2017-11-06	Delivery Couch	Delivery couch	ward furniture/surfaces	Ward Furniture/Surfaces	Y	N	N	NA	NA	NA	NA
Ethiopia	ES	ESI-E49	2017-11-06	Curtain	Curtain	ward furniture/surfaces	Ward Furniture/Surfaces	Y	N	N	NA	NA	NA	NA
Ethiopia	ES	ESI-E50	2017-11-06	Tap water	Tap water	ward furniture/surfaces	Sinks and Water System	N	N	N	NA	NA	NA	NA
Ethiopia	ES	ESI-E51						N	N	N	NA	NA	NA	NA
Ethiopia	ES	ESI-E52	2017-11-20	Tap water	Tap water	ward furniture/surfaces	Sinks and Water System	N	N	N	NA	NA	NA	NA
Ethiopia	ES	ESI-E53	2017-11-20	trolley	Trolley	mobile medical equipment	Mobile Medical Equipment	Y	N	N	NA	NA	NA	NA
Ethiopia	ES	ESI-E54	2017-11-20	Door handler	door handle	handles	Ward Furniture/Surfaces	N	N	N	NA	NA	NA	NA
Ethiopia	ES	ESI-E55	2017-11-20	curtain	Curtain	ward furniture/surfaces	Ward Furniture/Surfaces	Y	Y	Y	neg	neg	neg	neg
Ethiopia	ES	ESI-E56	2017-11-26	Tap water	Tap water	ward furniture/surfaces	Sinks and Water System	N	N	N	NA	NA	NA	NA
Ethiopia	ES	ESI-E57	2017-11-26	curtain	Curtain	ward furniture/surfaces	Ward Furniture/Surfaces	Y	Y	Y	neg	neg	neg	neg
Ethiopia	ES	ESI-E58	2017-11-27	tape water	Tap water	ward furniture/surfaces	Sinks and Water System	N	N	N	NA	NA	NA	NA
Ethiopia	ES	ESI-E59	2017-11-27	baby face mask	baby face mask	mobile medical equipment	Mobile Medical Equipment	N	N	N	NA	NA	NA	NA
Ethiopia	ES	ESI-E60	2017-11-27	mattres	Mattress	ward furniture/surfaces	Ward Furniture/Surfaces	N	N	N	NA	NA	NA	NA
Ethiopia	ES	ESI-E61	2017-11-27	weight scale	weighing scale	weighing scale/measuring tape	Patient's Zone	Y	N	Y	NA	neg	neg	neg
Ethiopia	ES	ESI-E62	2017-12-03	Tape water	Tap water	ward furniture/surfaces	Sinks and Water System	N	N	N	NA	NA	NA	NA
Ethiopia	ES	ESI-E63	2017-12-03	delivery couch	Delivery couch	ward furniture/surfaces	Ward Furniture/Surfaces	Y	Y	Y	neg	neg	neg	neg
Ethiopia	ES	ESI-E64	2017-12-03	curtain	Curtain	ward furniture/surfaces	Ward Furniture/Surfaces	Y	Y	Y	neg	neg	neg	neg
Ethiopia	ES	ESI-E65	2017-12-07	delivery couch	Delivery couch	ward furniture/surfaces	Ward Furniture/Surfaces	Y	N	N	NA	NA	NA	NA
Ethiopia	ES	ESI-E66	2017-12-07	weight scale	weighing scale	weighing scale/measuring tape	Patient's Zone	Y	Y	Y	neg	neg	neg	neg
Ethiopia	ES	ESI-E68	2017-12-12	Tape water	Tap water	ward furniture/surfaces	Sinks and Water System	N	N	N	NA	NA	NA	NA
Ethiopia	ES	ESI-E69	2017-12-12	delivery couch	Delivery couch	ward furniture/surfaces	Ward Furniture/Surfaces	Y	N	N	NA	NA	NA	NA
Ethiopia	ES	ESI-E70	2017-12-12	Radiant warmer	Radiant warmer	radiant warmers& resuscitation room	Emergency Neonatal Care	N	N	N	NA	NA	NA	NA
Ethiopia	ES	ESI-E71	2017-12-12	weight scale	weighing scale	weighing scale/measuring tape	Patient's Zone	Y	Y	Y	neg	neg	neg	neg
Ethiopia	ES	ESI-E72	2017-12-16	Radiant warmer	Radiant warmer	radiant warmers& resuscitation room	Emergency Neonatal Care	N	N	N	NA	NA	NA	NA
Ethiopia	ES	ESI-E73	2017-12-21	Tape water	Tap water	ward furniture/surfaces	Sinks and Water System	N	N	N	NA	NA	NA	NA
Ethiopia	ES	ESI-E74	2017-12-21	Radiant warmer	Radiant warmer	radiant warmers& resuscitation room	Emergency Neonatal Care	Y	N	N	NA	NA	NA	NA
Ethiopia	ES	ESI-E75	2017-12-21	delivery couch	Delivery couch	ward furniture/surfaces	Ward Furniture/Surfaces	Y	Y	Y	neg	neg	neg	neg
Ethiopia	ES	ESI-E76	2017-12-21	curtain	Curtain	ward furniture/surfaces	Ward Furniture/Surfaces	Y	Y	N	neg	NA	NA	NA
Ethiopia	ES	ESI-E77	2017-12-24	Radiant warmer	Radiant warmer	radiant warmers& resuscitation room	Emergency Neonatal Care	Y	Y	N	P	NA	NA	NA
Ethiopia	ES	ESI-E78						N	N	N	NA	NA	NA	NA
Ethiopia	ES	ESI-E79	2017-12-28	Tape water	Tap water	ward furniture/surfaces	Sinks and Water System	N	N	N	NA	NA	NA	NA
Ethiopia	ES	ESI-E80	2017-12-28	Radiant warmer	Radiant warmer	radiant warmers& resuscitation room	Emergency Neonatal Care	Y	Y	Y	P	neg	neg	neg
Ethiopia	ES	ESI-E81	2017-12-28	curtain	Curtain	ward furniture/surfaces	Ward Furniture/Surfaces	Y	Y	Y	neg	neg	neg	neg
Ethiopia	ES	ESI-E82	2017-12-31	curtain	Curtain	ward furniture/surfaces	Ward Furniture/Surfaces	Y	Y	Y	neg	neg	neg	neg
Ethiopia	ES	ESI-E83	2018-01-04	Tape water	Tap water	ward furniture/surfaces	Sinks and Water System	N	N	N	NA	NA	NA	NA
Ethiopia	ES	ESI-E84	2018-01-04	Radiant warmer	Radiant warmer	radiant warmers& resuscitation room	Emergency Neonatal Care	N	N	N	NA	NA	NA	NA
Ethiopia	ES	ESI-E86	2018-01-04	couch	Couch	ward furniture/surfaces	Ward Furniture/Surfaces	N	N	N	NA	NA	NA	NA
Ethiopia	ES	ESO-E0001	2017-08-01	Baby corner(bed)	Baby's corner	areas/objects around the baby	Patient's Zone	N	N	N	NA	NA	NA	NA
Ethiopia	ES	ESO-E0002	2017-08-02	Baby corner(bed)	Baby's corner	areas/objects around the baby	Patient's Zone	Y	N	Y	NA	neg	neg	neg
Ethiopia	ES	ESO-E0003	2017-08-04	Delivery Couch	Delivery couch	ward furniture/surfaces	Ward Furniture/Surfaces	N	N	N	NA	NA	NA	NA
Ethiopia	ES	ESO-E0004	2017-08-05	Baby corner(bed)	Baby's corner	areas/objects around the baby	Patient's Zone	Y	N	Y	NA	neg	neg	neg
Ethiopia	ES	ESO-E0005	2017-08-06	Delivery Couch	Delivery couch	ward furniture/surfaces	Ward Furniture/Surfaces	Y	Y	Y	neg	neg	neg	neg
Ethiopia	ES	ESO-E0006	2017-08-06	Baby corner(bed)	Baby's corner	areas/objects around the baby	Patient's Zone	Y	N	Y	NA	neg	neg	neg
Ethiopia	ES	ESO-E0007	2017-08-14	Delivery Couch	Delivery couch	ward furniture/surfaces	Ward Furniture/Surfaces	N	N	N	NA	NA	NA	NA
Ethiopia	ES	ESO-E0008	2017-08-23	Delivery Couch	Delivery couch	ward furniture/surfaces	Ward Furniture/Surfaces	N	N	N	NA	NA	NA	NA
Ethiopia	ES	ESO-E0009	2017-08-14	Delivery Couch	Delivery couch	ward furniture/surfaces	Ward Furniture/Surfaces	Y	N	Y	NA	neg	neg	neg
Ethiopia	ES	ESO-E0010	2017-08-15	Baby corner(bed)	Baby's corner	areas/objects around the baby	Patient's Zone	N	N	N	NA	NA	NA	NA
Ethiopia	ES	ESO-E0011	2017-10-15	ultra sound	ultrasound	medical equipment	Medical Equipment	N	N	N	NA	NA	NA	NA
Ethiopia	ES	ESO-E0012	2017-08-19	Delivery Couch	Delivery couch	ward furniture/surfaces	Ward Furniture/Surfaces	Y	Y	Y	neg	neg	neg	neg
Ethiopia	ES	ESO-E0013	2017-08-21	Delivery Couch	Delivery couch	ward furniture/surfaces	Ward Furniture/Surfaces	Y	Y	Y	neg	neg	neg	neg
Ethiopia	ES	ESO-E0014	2017-08-24	Delivery Couch	Delivery couch	ward furniture/surfaces	Ward Furniture/Surfaces	Y	N	Y	NA	neg	neg	neg
Ethiopia	ES	ESO-E0015	2017-08-25	Delivery Couch	Delivery couch	ward furniture/surfaces	Ward Furniture/Surfaces	Y	N	Y	NA	neg	neg	neg
Ethiopia	ES	ESO-E0016	2017-08-27	Delivery Couch	Delivery couch	ward furniture/surfaces	Ward Furniture/Surfaces	Y	N	Y	NA	neg	neg	neg
Ethiopia	ES	ESO-E0017	2017-09-01	Delivery Couch	Delivery couch	ward furniture/surfaces	Ward Furniture/Surfaces	Y	N	Y	NA	neg	neg	neg
Ethiopia	ES	ESO-E0018	2017-09-02	Sink	Sink	basin/sink	Sinks and Water System	Y	Y	Y	neg	neg	neg	neg
Ethiopia	ES	ESO-E0019	2017-09-04	Medication corner	Medication corner	ward furniture/surfaces	Ward Furniture/Surfaces	Y	Y	Y	neg	neg	neg	neg
Ethiopia	ES	ESO-E0020	2017-09-06	trolley	Trolley	mobile medical equipment	Mobile Medical Equipment	Y	Y	Y	neg	neg	neg	neg
Ethiopia	ES	ESO-E0021	2017-09-07	Wt Scale	weighing scale	weighing scale/measuring tape	Patient's Zone	Y	Y	Y	neg	neg	neg	neg
Ethiopia	ES	ESO-E0022	2017-10-13	Baby corner(bed)	Baby's corner	areas/objects around the baby	Patient's Zone	N	N	N	NA	NA	NA	NA
Ethiopia	ES	ESO-E0023	2017-10-19	Sink	Sink	basin/sink	Sinks and Water System	N	N	N	NA	NA	NA	NA
Ethiopia	ES	ESO-E0024	2017-09-13	Weight scale	weighing scale	weighing scale/measuring tape	Patient's Zone	Y	N	Y	NA	neg	neg	neg
Ethiopia	ES	ESO-E0025	2017-09-16	Baby corner(bed)	Baby's corner	areas/objects around the baby	Patient's Zone	Y	Y	Y	neg	neg	neg	neg
Ethiopia	ES	ESO-E0026		Delivery Couch	Delivery couch	ward furniture/surfaces	Ward Furniture/Surfaces	Y	Y	Y	neg	neg	neg	neg
Ethiopia	ES	ESO-E0027	2017-09-18	Baby corner(bed)	Baby's corner	areas/objects around the baby	Patient's Zone	N	N	N	NA	NA	NA	NA
Ethiopia	ES	ESO-E0028	2017-09-18	Baby corner(bed)	Baby's corner	areas/objects around the baby	Patient's Zone	N	N	N	NA	NA	NA	NA
Ethiopia	ES	ESO-E0029	2017-09-30	Delivery Couch	Delivery couch	ward furniture/surfaces	Ward Furniture/Surfaces	Y	N	Y	NA	neg	neg	neg
Ethiopia	ES	ESO-E0030	2017-09-30	Delivery Couch	Delivery couch	ward furniture/surfaces	Ward Furniture/Surfaces	Y	Y	Y	neg	neg	neg	neg
Ethiopia	ES	ESO-E0031	2017-10-01	Weight scale	weighing scale	weighing scale/measuring tape	Patient's Zone	Y	N	Y	NA	neg	neg	neg
Ethiopia	ES	ESO-E0032	2017-10-01	Baby corner	Baby's corner	areas/objects around the baby	Patient's Zone	Y	N	Y	NA	neg	neg	neg
Ethiopia	ES	ESO-E0033	2017-10-03	Delivery Couch	Delivery couch	ward furniture/surfaces	Ward Furniture/Surfaces	Y	Y	Y	neg	neg	neg	neg
Ethiopia	ES	ESO-E0034	2017-10-06	Baby corner(bed)	Baby's corner	areas/objects around the baby	Patient's Zone	N	N	N	NA	NA	NA	NA
Ethiopia	ES	ESO-E0035	2017-10-08	chair	Chair	ward furniture/surfaces	Ward Furniture/Surfaces	N	N	N	NA	NA	NA	NA
Ethiopia	ES	ESO-E0036	2017-10-16	IV BAG	intravenous (IV) line and accessories	medical equipment	Medical Equipment	N	N	N	NA	NA	NA	NA
Ethiopia	ES	ESO-E0037	2017-10-17	Delivery Couch	Delivery couch	ward furniture/surfaces	Ward Furniture/Surfaces	N	N	N	NA	NA	NA	NA
Ethiopia	ES	ESO-E0038	2017-10-13	Delivery Couch	Delivery couch	ward furniture/surfaces	Ward Furniture/Surfaces	Y	N	Y	NA	neg	neg	neg
Ethiopia	ES	ESO-E0039	2017-10-17	Delivery Couch	Delivery couch	ward furniture/surfaces	Ward Furniture/Surfaces	N	N	N	NA	NA	NA	NA
Ethiopia	ES	ESO-E0040	2017-10-19	Delivery Couch	Delivery couch	ward furniture/surfaces	Ward Furniture/Surfaces	Y	Y	Y	P	neg	neg	neg
Ethiopia	ES	ESO-E0041	2017-10-20	Curtain	Curtain	ward furniture/surfaces	Ward Furniture/Surfaces	Y	Y	Y	neg	neg	neg	neg
Ethiopia	ES	ESO-E0042	2017-10-20	Delivery Couch	Delivery couch	ward furniture/surfaces	Ward Furniture/Surfaces	N	N	N	NA	NA	NA	NA
Ethiopia	ES	ESO-E0043	2017-10-30	Delivery Couch	Delivery couch	ward furniture/surfaces	Ward Furniture/Surfaces	N	N	N	NA	NA	NA	NA
Ethiopia	ES	ESO-E0044	2017-10-30	Tap water	Tap water	ward furniture/surfaces	Sinks and Water System	N	N	N	NA	NA	NA	NA
Ethiopia	ES	ESO-E45	2017-11-04	Tap water	Tap water	ward furniture/surfaces	Sinks and Water System	N	N	N	NA	NA	NA	NA
Ethiopia	ES	ESO-E46	2017-11-04	Fetoscope	Fetoscope	medical equipment	Medical Equipment	N	N	N	NA	NA	NA	NA
Ethiopia	ES	ESO-E47	2017-11-06	Tap water	Tap water	ward furniture/surfaces	Sinks and Water System	N	N	N	NA	NA	NA	NA
Ethiopia	ES	ESO-E48	2017-11-06	BP apparatus	stethoscope and sphygmomanometer	medical equipment	Medical Equipment	Y	N	N	NA	NA	NA	NA
Ethiopia	ES	ESO-E49	2017-11-06	Deliver coauch	Delivery couch	ward furniture/surfaces	Ward Furniture/Surfaces	N	N	N	NA	NA	NA	NA
Ethiopia	ES	ESO-E50	2017-11-06	Tap water	Tap water	ward furniture/surfaces	Sinks and Water System	N	N	N	NA	NA	NA	NA
Ethiopia	ES	ESO-E51						Y	Y	N	neg	NA	NA	NA
Ethiopia	ES	ESO-E52	2017-11-20	Tap water	Tap water	ward furniture/surfaces	Sinks and Water System	N	N	N	NA	NA	NA	NA
Ethiopia	ES	ESO-E53	2017-11-20	whellchair	Wheelchair	ward furniture/surfaces	Ward Furniture/Surfaces	Y	Y	Y	P	neg	neg	neg
Ethiopia	ES	ESO-E54	2017-11-20	saftey box	Safety box	ward furniture/surfaces	Ward Furniture/Surfaces	Y	Y	Y	neg	neg	neg	neg
Ethiopia	ES	ESO-E55	2017-11-20	sink	Sink	basin/sink	Sinks and Water System	Y	Y	Y	P	neg	neg	neg
Ethiopia	ES	ESO-E56	2017-11-26	sink	Sink	basin/sink	Sinks and Water System	Y	Y	Y	neg	neg	neg	neg
Ethiopia	ES	ESO-E57	2017-11-26	Tap water	Tap water	ward furniture/surfaces	Sinks and Water System	N	N	N	NA	NA	NA	NA
Ethiopia	ES	ESO-E58	2017-11-27	Tape water	Tap water	ward furniture/surfaces	Sinks and Water System	N	N	N	NA	NA	NA	NA
Ethiopia	ES	ESO-E59	2017-11-27	delivery couch	Delivery couch	ward furniture/surfaces	Ward Furniture/Surfaces	Y	Y	Y	neg	neg	neg	neg
Ethiopia	ES	ESO-E60	2017-11-27	wt.scale	weighing scale	weighing scale/measuring tape	Patient's Zone	Y	Y	Y	P	neg	neg	neg
Ethiopia	ES	ESO-E61	2017-11-27	delivery couch	Delivery couch	ward furniture/surfaces	Ward Furniture/Surfaces	N	N	N	NA	NA	NA	NA
Ethiopia	ES	ESO-E62	2017-12-03	Tape water	Tap water	ward furniture/surfaces	Sinks and Water System	N	N	N	NA	NA	NA	NA
Ethiopia	ES	ESO-E63	2017-12-03	delivery couch	Delivery couch	ward furniture/surfaces	Ward Furniture/Surfaces	Y	Y	Y	neg	neg	neg	neg
Ethiopia	ES	ESO-E64	2017-12-03	curtain	Curtain	ward furniture/surfaces	Ward Furniture/Surfaces	Y	ND	ND	ND	ND	ND	ND
Ethiopia	ES	ESO-E65	2017-12-07	curtain	Curtain	ward furniture/surfaces	Ward Furniture/Surfaces	Y	N	Y	NA	neg	neg	neg
Ethiopia	ES	ESO-E66	2017-12-07	delivery couch	Delivery couch	ward furniture/surfaces	Ward Furniture/Surfaces	Y	Y	Y	neg	neg	neg	neg
Ethiopia	ES	ESO-E67	2017-12-07	Tape water	Tap water	ward furniture/surfaces	Sinks and Water System	N	N	N	NA	NA	NA	NA
Ethiopia	ES	ESO-E68	2017-12-12	Tape water	Tap water	ward furniture/surfaces	Sinks and Water System	N	N	N	NA	NA	NA	NA
Ethiopia	ES	ESO-E69	2017-12-12	delivery couch	Delivery couch	ward furniture/surfaces	Ward Furniture/Surfaces	Y	Y	Y	P	neg	neg	neg
Ethiopia	ES	ESO-E70	2017-12-12	curtain	Curtain	ward furniture/surfaces	Ward Furniture/Surfaces	Y	Y	Y	neg	neg	neg	neg
Ethiopia	ES	ESO-E71	2017-12-12	sink	Sink	basin/sink	Sinks and Water System	Y	Y	Y	neg	neg	neg	neg
Ethiopia	ES	ESO-E72	2017-12-16	delivery couch	Delivery couch	ward furniture/surfaces	Ward Furniture/Surfaces	Y	Y	Y	neg	neg	neg	neg
Ethiopia	ES	ESO-E73	2017-12-21	Tape water	Tap water	ward furniture/surfaces	Sinks and Water System	N	N	N	NA	NA	NA	NA
Ethiopia	ES	ESO-E74	2017-12-21	delivery couch	Delivery couch	ward furniture/surfaces	Ward Furniture/Surfaces	N	N	N	NA	NA	NA	NA
Ethiopia	ES	ESO-E75	2017-12-21	delivery couch	Delivery couch	ward furniture/surfaces	Ward Furniture/Surfaces	Y	Y	N	neg	NA	NA	NA
Ethiopia	ES	ESO-E76	2017-12-21	table	Table	ward furniture/surfaces	Ward Furniture/Surfaces	N	N	N	NA	NA	NA	NA
Ethiopia	ES	ESO-E77	2017-12-24	delivery couch	Delivery couch	ward furniture/surfaces	Ward Furniture/Surfaces	Y	N	N	NA	NA	NA	NA
Ethiopia	ES	ESO-E78	2017-12-28	Tape water	Tap water	ward furniture/surfaces	Sinks and Water System	N	N	N	NA	NA	NA	NA
Ethiopia	ES	ESO-E79	2017-12-28	curtain	Curtain	ward furniture/surfaces	Ward Furniture/Surfaces	Y	Y	Y	neg	neg	neg	neg
Ethiopia	ES	ESO-E80	2017-12-28	Radiant warmer	Radiant warmer	radiant warmers& resuscitation room	Emergency Neonatal Care	N	N	N	NA	NA	NA	NA
Ethiopia	ES	ESO-E81	2017-12-28	delivery couch	Delivery couch	ward furniture/surfaces	Ward Furniture/Surfaces	N	Y	N	neg	NA	NA	NA
Ethiopia	ES	ESO-E82	2017-12-31	curtain	Curtain	ward furniture/surfaces	Ward Furniture/Surfaces	Y	Y	Y	neg	neg	neg	neg
Ethiopia	ES	ESO-E83	2018-01-03	Tape water	Tap water	ward furniture/surfaces	Sinks and Water System	Y	Y	Y	neg	neg	neg	neg
Ethiopia	ES	ESO-E84	2018-01-04	sink	Sink	basin/sink	Sinks and Water System	N	N	N	NA	NA	NA	NA
Ethiopia	ES	ESO-E85	2018-01-04	curtain	Curtain	ward furniture/surfaces	Ward Furniture/Surfaces	Y	Y	Y	neg	neg	neg	neg
Ethiopia	ES	ESO-E86	2018-01-04	couch	Couch	ward furniture/surfaces	Ward Furniture/Surfaces	Y	Y	N	P	NA	NA	NA
Ethiopia	ES	ESS-E0001	2017-08-01	Baby corner(bed)	Baby's corner	areas/objects around the baby	Patient's Zone	N	N	N	NA	NA	NA	NA
Ethiopia	ES	ESS-E0002	2017-08-04	bed at middle part	Bed	ward furniture/surfaces	Patient's Zone	N	N	N	NA	NA	NA	NA
Ethiopia	ES	ESS-E0003	2017-08-06	Radiant warmer	Radiant warmer	radiant warmers& resuscitation room	Emergency Neonatal Care	N	N	N	NA	NA	NA	NA
Ethiopia	ES	ESS-E0004	2017-08-07	phototherapy machine	Phototherapy machine	phototherapy	Medical Equipment	Y	Y	Y	P	neg	neg	neg
Ethiopia	ES	ESS-E0005	2017-08-15	Radiant warmer	Radiant warmer	radiant warmers& resuscitation room	Emergency Neonatal Care	N	N	N	NA	NA	NA	NA
Ethiopia	ES	ESS-E0006	2017-08-23	wall	Wall	ward furniture/surfaces	Ward Furniture/Surfaces	N	N	N	NA	NA	NA	NA
Ethiopia	ES	ESS-E0007	2017-08-25	Heater	NA			N	N	N	NA	NA	NA	NA
Ethiopia	ES	ESS-E0008	2017-09-04	Manual suker	suction bulb	mobile medical equipment	Mobile Medical Equipment	Y	Y	Y	neg	neg	neg	neg
Ethiopia	ES	ESS-E0009	2017-08-23	Baby corner(bed)	Baby's corner	areas/objects around the baby	Patient's Zone	N	N	N	NA	NA	NA	NA
Ethiopia	ES	ESS-E0010	2017-08-20	Sink	Sink	basin/sink	Sinks and Water System	N	N	N	NA	NA	NA	NA
Ethiopia	ES	ESS-E0011	2017-08-21	Bed	Bed	ward furniture/surfaces	Patient's Zone	N	N	N	NA	NA	NA	NA
Ethiopia	ES	ESS-E0012	2017-08-22	phototherapy machine	Phototherapy machine	phototherapy	Medical Equipment	Y	Y	Y	P	neg	neg	neg
Ethiopia	ES	ESS-E0013	2017-09-20	Phototerapy Machien	Phototherapy machine	phototherapy	Medical Equipment	Y	Y	Y	neg	neg	neg	neg
Ethiopia	ES	ESS-E0014	2017-08-18	Phototerapy Machien	Phototherapy machine	phototherapy	Medical Equipment	Y	Y	Y	P	neg	neg	neg
Ethiopia	ES	ESS-E0015	2017-09-21	pulsoxometry	Pulse oximetry	medical equipment	Medical Equipment	Y	Y	Y	P	neg	neg	neg
Ethiopia	ES	ESS-E0016	2017-09-21	Ambubag tube	Ambu bag (bag valve mask) and accessories	medical equipment	Medical Equipment	Y	Y	Y	ND	neg	neg	neg
Ethiopia	ES	ESS-E0017	2017-09-02	Incubator	Incubator	incubators	Emergency Neonatal Care	N	N	N	NA	NA	NA	NA
Ethiopia	ES	ESS-E0018	2017-09-04	Baby corner(bed)	Baby's corner	areas/objects around the baby	Patient's Zone	Y	Y	Y	P	neg	neg	neg
Ethiopia	ES	ESS-E0019	2017-09-07	Humidifier	NA			N	N	N	NA	NA	NA	NA
Ethiopia	ES	ESS-E0020	2017-09-03	phototherapy	Phototherapy machine	phototherapy	Medical Equipment	Y	Y	Y	neg	neg	neg	neg
Ethiopia	ES	ESS-E0021	2017-09-09	Safety box	Safety box	ward furniture/surfaces	Ward Furniture/Surfaces	Y	Y	Y	P	neg	neg	neg
Ethiopia	ES	ESS-E0022	2017-09-09	Weight scale	weighing scale	weighing scale/measuring tape	Patient's Zone	N	N	N	NA	NA	NA	NA
Ethiopia	ES	ESS-E0023	2017-09-12	Flour	floor	floor	Ward Furniture/Surfaces	Y	Y	Y	neg	neg	neg	neg
Ethiopia	ES	ESS-E0024	2017-09-13	Thermometer	Thermometer	medical equipment	Medical Equipment	N	N	N	NA	NA	NA	NA
Ethiopia	ES	ESS-E0025	2017-09-14	Stetescope	stethoscope and sphygmomanometer	medical equipment	Medical Equipment	N	N	N	NA	NA	NA	NA
Ethiopia	ES	ESS-E0026	2017-09-15	Wall	Wall	ward furniture/surfaces	Ward Furniture/Surfaces	N	N	N	NA	NA	NA	NA
Ethiopia	ES	ESS-E0027	2017-09-19	Incubator	Incubator	incubators	Emergency Neonatal Care	N	N	N	NA	NA	NA	NA
Ethiopia	ES	ESS-E0028	2017-09-21	Flour	floor	floor	Ward Furniture/Surfaces	N	N	N	NA	NA	NA	NA
Ethiopia	ES	ESS-E0029	2017-09-22	Bed	Bed	ward furniture/surfaces	Patient's Zone	N	N	N	NA	NA	NA	NA
Ethiopia	ES	ESS-E0030	2017-10-15	Suction bulb	suction bulb	mobile medical equipment	Mobile Medical Equipment	Y	Y	Y	P	neg	neg	neg
Ethiopia	ES	ESS-E0031	2017-10-15	IV SET	intravenous (IV) line and accessories	medical equipment	Medical Equipment	N	N	N	NA	NA	NA	NA
Ethiopia	ES	ESS-E0032	2017-10-16	IV LINE	intravenous (IV) line and accessories	medical equipment	Medical Equipment	N	N	N	NA	NA	NA	NA
Ethiopia	ES	ESS-E0033	2017-10-17	Weight scale	weighing scale	weighing scale/measuring tape	Patient's Zone	N	N	N	NA	NA	NA	NA
Ethiopia	ES	ESS-E0034	2017-10-03	Bed	Bed	ward furniture/surfaces	Patient's Zone	N	N	N	NA	NA	NA	NA
Ethiopia	ES	ESS-E0035	2017-10-06	Bed	Bed	ward furniture/surfaces	Patient's Zone	Y	Y	Y	P	neg	neg	neg
Ethiopia	ES	ESS-E0036	2017-10-07	Wall	Wall	ward furniture/surfaces	Ward Furniture/Surfaces	Y	Y	Y	P	neg	neg	neg
Ethiopia	ES	ESS-E0037	2017-10-08	Oxygen clinder	Oxygen cylinder	Oxygen therapy	Mobile Medical Equipment	N	N	N	NA	NA	NA	NA
Ethiopia	ES	ESS-E0038	2017-10-19	Suction bulb	suction bulb	mobile medical equipment	Mobile Medical Equipment	Y	Y	Y	P	neg	neg	neg
Ethiopia	ES	ESS-E0039	2017-10-19	Phototherapy Machine	Phototherapy machine	phototherapy	Medical Equipment	N	N	N	NA	NA	NA	NA
Ethiopia	ES	ESS-E0040	2017-10-19	Incubator	Incubator	incubators	Emergency Neonatal Care	N	N	N	NA	NA	NA	NA
Ethiopia	ES	ESS-E0041	2017-10-20	Pulseoxymetry	Pulse oximetry	medical equipment	Medical Equipment	N	N	N	NA	NA	NA	NA
Ethiopia	ES	ESS-E0042	2017-10-23	round table	Table	ward furniture/surfaces	Ward Furniture/Surfaces	N	N	N	NA	NA	NA	NA
Ethiopia	ES	ESS-E0043	2017-10-30	Weight scale	weighing scale	weighing scale/measuring tape	Patient's Zone	Y	Y	Y	P	neg	neg	neg
Ethiopia	ES	ESS-E0044	2017-10-30	Tap water	Tap water	ward furniture/surfaces	Sinks and Water System	N	N	N	NA	NA	NA	NA
Ethiopia	ES	ESS-E43	2017-10-30	Weight scale	weighing scale	weighing scale/measuring tape	Patient's Zone	N	N	N	NA	NA	NA	NA
Ethiopia	ES	ESS-E45	2017-11-04	Tap water	Tap water	ward furniture/surfaces	Sinks and Water System	N	N	N	NA	NA	NA	NA
Ethiopia	ES	ESS-E47	2017-11-06	Tap water	Tap water	ward furniture/surfaces	Sinks and Water System	N	N	N	NA	NA	NA	NA
Ethiopia	ES	ESS-E49	2017-11-06	Rdiant warmer	Radiant warmer	radiant warmers& resuscitation room	Emergency Neonatal Care	Y	Y	Y	P	neg	neg	neg
Ethiopia	ES	ESS-E50	2017-11-06	Tap water	Tap water	ward furniture/surfaces	Sinks and Water System	N	N	N	NA	NA	NA	NA
Ethiopia	ES	ESS-E52	2017-11-20	Tap water	Tap water	ward furniture/surfaces	Sinks and Water System	N	N	N	NA	NA	NA	NA
Ethiopia	ES	ESS-E53	2017-11-20	perfuser	Perfusion therapy	medical equipment	Medical Equipment	Y	Y	Y	neg	neg	neg	neg
Ethiopia	ES	ESS-E54	2017-11-20	Blood drowing table	Blood drawing table	ward furniture/surfaces	Ward Furniture/Surfaces	N	N	N	NA	NA	NA	NA
Ethiopia	ES	ESS-E55	2017-11-20	Tap water	Tap water	ward furniture/surfaces	Sinks and Water System	N	N	N	NA	NA	NA	NA
Ethiopia	ES	ESS-E56	2017-11-26	Tap water	Tap water	ward furniture/surfaces	Sinks and Water System	Y	Y	N	P	NA	NA	NA
Ethiopia	ES	ESS-E58	2017-11-26	radiant	Radiant warmer	radiant warmers& resuscitation room	Emergency Neonatal Care	N	N	N	NA	NA	NA	NA
Ethiopia	ES	ESS-E59	2017-11-27	Tape water	Tap water	ward furniture/surfaces	Sinks and Water System	Y	Y	Y	neg	neg	neg	neg
Ethiopia	ES	ESS-E60	2017-11-27	Incubator	Incubator	incubators	Emergency Neonatal Care	N	N	N	NA	NA	NA	NA
Ethiopia	ES	ESS-E61	2017-11-27	Radiant warmer	Radiant warmer	radiant warmers& resuscitation room	Emergency Neonatal Care	N	N	N	NA	NA	NA	NA
Ethiopia	ES	ESS-E62	2017-12-03	Tape water	Tap water	ward furniture/surfaces	Sinks and Water System	N	N	N	NA	NA	NA	NA
Ethiopia	ES	ESS-E63	2017-12-03	Incubator	Incubator	incubators	Emergency Neonatal Care	Y	Y	Y	neg	neg	neg	neg
Ethiopia	ES	ESS-E64	2017-12-03	Radiant warmer	Radiant warmer	radiant warmers& resuscitation room	Emergency Neonatal Care	Y	Y	Y	P	neg	neg	neg
Ethiopia	ES	ESS-E65	2017-12-03	Radiant warmer	Radiant warmer	radiant warmers& resuscitation room	Emergency Neonatal Care	Y	Y	Y	P	neg	neg	neg
Ethiopia	ES	ESS-E66	2017-12-03	curtain	Curtain	ward furniture/surfaces	Ward Furniture/Surfaces	N	N	N	NA	NA	NA	NA
Ethiopia	ES	ESS-E67	2017-12-07	Tape water	Tap water	ward furniture/surfaces	Sinks and Water System	N	N	N	NA	NA	NA	NA
Ethiopia	ES	ESS-E68	2017-12-12	Tape water	Tap water	ward furniture/surfaces	Sinks and Water System	N	N	N	NA	NA	NA	NA
Ethiopia	ES	ESS-E69	2017-12-12	Radiant warmer	Radiant warmer	radiant warmers& resuscitation room	Emergency Neonatal Care	N	N	N	NA	NA	NA	NA
Ethiopia	ES	ESS-E70	2017-12-12	Radiant warmer	Radiant warmer	radiant warmers& resuscitation room	Emergency Neonatal Care	Y	Y	Y	neg	P	neg	neg
Ethiopia	ES	ESS-E71	2017-12-12	Radiant warmer	Radiant warmer	radiant warmers& resuscitation room	Emergency Neonatal Care	Y	Y	Y	P	neg	neg	neg
Ethiopia	ES	ESS-E72	2017-12-16	Radiant warmer	Radiant warmer	radiant warmers& resuscitation room	Emergency Neonatal Care	Y	Y	Y	neg	neg	neg	neg
Ethiopia	ES	ESS-E73	2017-12-21	Tape water	Tap water	ward furniture/surfaces	Sinks and Water System	N	N	N	NA	NA	NA	NA
Ethiopia	ES	ESS-E74	2017-12-21	Radiant warmer	Radiant warmer	radiant warmers& resuscitation room	Emergency Neonatal Care	Y	Y	N	P	NA	NA	NA
Ethiopia	ES	ESS-E75	2017-12-21	Incubator	Incubator	incubators	Emergency Neonatal Care	Y	Y	Y	P	neg	neg	neg
Ethiopia	ES	ESS-E76	2017-12-21	Radiant warmer	Radiant warmer	radiant warmers& resuscitation room	Emergency Neonatal Care	N	N	N	NA	NA	NA	NA
Ethiopia	ES	ESS-E77	2017-12-24	Radiant warmer	Radiant warmer	radiant warmers& resuscitation room	Emergency Neonatal Care	Y	Y	Y	P	neg	neg	P
Ethiopia	ES	ESS-E78	2017-12-28	Tape water	Tap water	ward furniture/surfaces	Sinks and Water System	N	N	N	NA	NA	NA	NA
Ethiopia	ES	ESS-E79	2017-12-28	delivery couch	Delivery couch	ward furniture/surfaces	Ward Furniture/Surfaces	N	N	N	NA	NA	NA	NA
Ethiopia	ES	ESS-E80						N	N	N	NA	NA	NA	NA
Ethiopia	ES	ESS-E81	2017-12-28	Radiant warmer	Radiant warmer	radiant warmers& resuscitation room	Emergency Neonatal Care	N	N	N	NA	NA	NA	NA
Ethiopia	ES	ESS-E82	2017-12-31	SINK	Sink	basin/sink	Sinks and Water System	Y	Y	Y	neg	neg	neg	neg
Ethiopia	ES	ESS-E83	2017-12-31	sink	Sink	basin/sink	Sinks and Water System	Y	Y	Y	P	neg	neg	P
Ethiopia	ES	ESS-E84	2018-01-04	Radiant warmer	Radiant warmer	radiant warmers& resuscitation room	Emergency Neonatal Care	Y	Y	Y	neg	neg	neg	neg
Ethiopia	ES	ESS-E86	2018-01-04	Tape water	Tap water	ward furniture/surfaces	Sinks and Water System	N	N	N	NA	NA	NA	NA
Ethiopia	ES	ESS-E87	2018-01-04	Tape water	Tap water	ward furniture/surfaces	Sinks and Water System	N	N	N	NA	NA	NA	NA
Nigeria	NK	NK-E(baseline)1	2017-01-04	Radiant warmer	Radiant warmer	radiant warmers& resuscitation room	Emergency Neonatal Care	N	Y	Y	P	neg	neg	neg
Nigeria	NK	NK-E(baseline)10	2017-07-21	Soliset	NA			Y	Y	Y	neg	neg	neg	neg
Nigeria	NK	NK-E(baseline)100						Y	Y	Y	neg	neg	neg	neg
Nigeria	NK	NK-E(baseline)101						Y	Y	Y	neg	neg	neg	neg
Nigeria	NK	NK-E(baseline)102						Y	Y	Y	neg	neg	neg	neg
Nigeria	NK	NK-E(baseline)103						Y	Y	Y	neg	neg	neg	neg
Nigeria	NK	NK-E(baseline)104						Y	Y	Y	neg	neg	neg	neg
Nigeria	NK	NK-E(baseline)105						N	N	N	NA	NA	NA	NA
Nigeria	NK	NK-E(baseline)106						Y	Y	Y	neg	neg	neg	neg
Nigeria	NK	NK-E(baseline)107						Y	Y	Y	neg	neg	neg	neg
Nigeria	NK	NK-E(baseline)108						Y	Y	Y	neg	neg	neg	neg
Nigeria	NK	NK-E(baseline)109						N	N	N	NA	NA	NA	NA
Nigeria	NK	NK-E(baseline)11						N	N	N	NA	NA	NA	NA
Nigeria	NK	NK-E(baseline)110						Y	Y	Y	neg	neg	neg	neg
Nigeria	NK	NK-E(baseline)111						Y	Y	Y	neg	neg	neg	neg
Nigeria	NK	NK-E(baseline)112						Y	Y	Y	neg	neg	neg	neg
Nigeria	NK	NK-E(baseline)113						Y	Y	Y	neg	neg	neg	neg
Nigeria	NK	NK-E(baseline)114						Y	Y	Y	neg	neg	neg	neg
Nigeria	NK	NK-E(baseline)115						Y	Y	Y	neg	neg	neg	neg
Nigeria	NK	NK-E(baseline)116						N	N	N	NA	NA	NA	NA
Nigeria	NK	NK-E(baseline)117						Y	Y	Y	neg	neg	neg	neg
Nigeria	NK	NK-E(baseline)118						Y	Y	Y	P	neg	neg	neg
Nigeria	NK	NK-E(baseline)119						Y	Y	Y	neg	neg	neg	neg
Nigeria	NK	NK-E(baseline)12						N	N	N	NA	NA	NA	NA
Nigeria	NK	NK-E(baseline)120						Y	Y	Y	neg	neg	neg	neg
Nigeria	NK	NK-E(baseline)121						Y	Y	Y	neg	neg	neg	neg
Nigeria	NK	NK-E(baseline)122						Y	Y	Y	neg	neg	neg	neg
Nigeria	NK	NK-E(baseline)123						N	N	N	NA	NA	NA	NA
Nigeria	NK	NK-E(baseline)124						Y	Y	Y	neg	neg	neg	neg
Nigeria	NK	NK-E(baseline)125						Y	Y	Y	neg	neg	neg	neg
Nigeria	NK	NK-E(baseline)126						Y	Y	Y	neg	neg	neg	neg
Nigeria	NK	NK-E(baseline)127						Y	Y	Y	neg	neg	neg	neg
Nigeria	NK	NK-E(baseline)128						Y	Y	Y	neg	neg	neg	neg
Nigeria	NK	NK-E(baseline)129						Y	Y	Y	neg	neg	neg	neg
Nigeria	NK	NK-E(baseline)13						Y	Y	Y	P	neg	neg	neg
Nigeria	NK	NK-E(baseline)130						Y	Y	Y	neg	neg	neg	neg
Nigeria	NK	NK-E(baseline)131						N	N	N	NA	NA	NA	NA
Nigeria	NK	NK-E(baseline)132						Y	Y	Y	neg	neg	neg	neg
Nigeria	NK	NK-E(baseline)133						Y	Y	Y	neg	neg	neg	neg
Nigeria	NK	NK-E(baseline)134						Y	Y	Y	neg	neg	neg	neg
Nigeria	NK	NK-E(baseline)135						Y	Y	Y	neg	neg	neg	neg
Nigeria	NK	NK-E(baseline)136						Y	Y	Y	neg	neg	neg	neg
Nigeria	NK	NK-E(baseline)137						Y	Y	Y	neg	neg	neg	neg
Nigeria	NK	NK-E(baseline)138						Y	Y	Y	neg	neg	neg	neg
Nigeria	NK	NK-E(baseline)139						Y	Y	Y	neg	neg	neg	neg
Nigeria	NK	NK-E(baseline)14						Y	Y	Y	neg	neg	neg	neg
Nigeria	NK	NK-E(baseline)140						N	N	N	NA	NA	NA	NA
Nigeria	NK	NK-E(baseline)141						Y	Y	Y	neg	neg	neg	neg
Nigeria	NK	NK-E(baseline)142						Y	Y	Y	neg	neg	neg	neg
Nigeria	NK	NK-E(baseline)143						Y	Y	Y	neg	neg	neg	neg
Nigeria	NK	NK-E(baseline)144						Y	Y	Y	neg	neg	neg	neg
Nigeria	NK	NK-E(baseline)145						Y	Y	Y	neg	P	neg	neg
Nigeria	NK	NK-E(baseline)146						Y	Y	Y	neg	neg	neg	neg
Nigeria	NK	NK-E(baseline)147						Y	Y	Y	neg	P	neg	neg
Nigeria	NK	NK-E(baseline)148						Y	Y	Y	neg	neg	neg	neg
Nigeria	NK	NK-E(baseline)149						Y	Y	Y	neg	neg	neg	neg
Nigeria	NK	NK-E(baseline)15						Y	Y	Y	neg	neg	neg	neg
Nigeria	NK	NK-E(baseline)150						Y	Y	Y	neg	neg	neg	neg
Nigeria	NK	NK-E(baseline)151						Y	Y	Y	neg	neg	neg	neg
Nigeria	NK	NK-E(baseline)152						Y	Y	Y	P	neg	neg	neg
Nigeria	NK	NK-E(baseline)153						Y	Y	Y	P	neg	neg	neg
Nigeria	NK	NK-E(baseline)154						Y	Y	Y	neg	neg	neg	neg
Nigeria	NK	NK-E(baseline)155						Y	Y	Y	neg	P	neg	neg
Nigeria	NK	NK-E(baseline)156						Y	Y	Y	P	neg	neg	neg
Nigeria	NK	NK-E(baseline)157						Y	Y	Y	P	P	neg	neg
Nigeria	NK	NK-E(baseline)158						Y	Y	Y	P	P	neg	neg
Nigeria	NK	NK-E(baseline)159						Y	Y	Y	neg	neg	neg	neg
Nigeria	NK	NK-E(baseline)16						N	N	N	NA	NA	NA	NA
Nigeria	NK	NK-E(baseline)160						Y	Y	Y	neg	P	neg	neg
Nigeria	NK	NK-E(baseline)161						Y	Y	Y	P	neg	neg	neg
Nigeria	NK	NK-E(baseline)162						Y	Y	Y	P	neg	neg	neg
Nigeria	NK	NK-E(baseline)163						Y	Y	Y	neg	neg	neg	neg
Nigeria	NK	NK-E(baseline)164						Y	Y	Y	P	neg	neg	neg
Nigeria	NK	NK-E(baseline)165						Y	Y	Y	neg	P	neg	neg
Nigeria	NK	NK-E(baseline)166						Y	Y	Y	P	neg	neg	neg
Nigeria	NK	NK-E(baseline)167						Y	Y	Y	P	neg	neg	neg
Nigeria	NK	NK-E(baseline)168						Y	Y	Y	neg	neg	neg	neg
Nigeria	NK	NK-E(baseline)169						Y	Y	Y	neg	neg	neg	neg
Nigeria	NK	NK-E(baseline)17						Y	Y	Y	P	neg	neg	P
Nigeria	NK	NK-E(baseline)170						Y	Y	Y	P	neg	neg	neg
Nigeria	NK	NK-E(baseline)171						Y	Y	Y	P	P	neg	neg
Nigeria	NK	NK-E(baseline)172						Y	Y	Y	P	neg	neg	neg
Nigeria	NK	NK-E(baseline)173						Y	Y	Y	P	neg	neg	neg
Nigeria	NK	NK-E(baseline)174						Y	Y	Y	P	neg	neg	neg
Nigeria	NK	NK-E(baseline)175						Y	Y	Y	P	P	neg	P
Nigeria	NK	NK-E(baseline)176						Y	Y	Y	P	neg	neg	neg
Nigeria	NK	NK-E(baseline)177						Y	Y	Y	P	neg	neg	neg
Nigeria	NK	NK-E(baseline)178						Y	Y	Y	P	neg	neg	neg
Nigeria	NK	NK-E(baseline)179						Y	Y	Y	P	P	neg	neg
Nigeria	NK	NK-E(baseline)18						Y	Y	Y	neg	neg	neg	neg
Nigeria	NK	NK-E(baseline)180						Y	Y	Y	P	neg	neg	neg
Nigeria	NK	NK-E(baseline)181						Y	Y	Y	P	P	neg	neg
Nigeria	NK	NK-E(baseline)182						Y	Y	Y	neg	P	neg	neg
Nigeria	NK	NK-E(baseline)183						Y	Y	Y	P	neg	neg	neg
Nigeria	NK	NK-E(baseline)184						Y	Y	Y	P	neg	neg	neg
Nigeria	NK	NK-E(baseline)185						Y	Y	Y	P	P	neg	neg
Nigeria	NK	NK-E(baseline)186						Y	Y	Y	P	neg	neg	neg
Nigeria	NK	NK-E(baseline)187						Y	Y	Y	P	neg	neg	neg
Nigeria	NK	NK-E(baseline)188						Y	Y	Y	P	neg	neg	neg
Nigeria	NK	NK-E(baseline)189						Y	Y	Y	P	neg	neg	neg
Nigeria	NK	NK-E(baseline)19						Y	Y	Y	neg	neg	neg	neg
Nigeria	NK	NK-E(baseline)190						Y	Y	Y	P	neg	neg	neg
Nigeria	NK	NK-E(baseline)191						Y	Y	Y	P	neg	neg	neg
Nigeria	NK	NK-E(baseline)192						Y	Y	Y	P	neg	neg	neg
Nigeria	NK	NK-E(baseline)193						Y	Y	Y	P	P	neg	neg
Nigeria	NK	NK-E(baseline)194						Y	Y	Y	neg	neg	neg	neg
Nigeria	NK	NK-E(baseline)195						Y	Y	Y	P	P	neg	neg
Nigeria	NK	NK-E(baseline)196						Y	Y	Y	neg	neg	neg	neg
Nigeria	NK	NK-E(baseline)197						Y	Y	Y	neg	P	neg	neg
Nigeria	NK	NK-E(baseline)198						N	N	N	NA	NA	NA	NA
Nigeria	NK	NK-E(baseline)199						N	N	N	NA	NA	NA	NA
Nigeria	NK	NK-E(baseline)2	2017-07-21	Cot 1	Cot	ward furniture/surfaces	Patient's Zone	N	N	N	NA	NA	NA	NA
Nigeria	NK	NK-E(baseline)20						Y	Y	Y	neg	neg	neg	neg
Nigeria	NK	NK-E(baseline)200						N	N	N	NA	NA	NA	NA
Nigeria	NK	NK-E(baseline)21						Y	Y	Y	neg	neg	neg	neg
Nigeria	NK	NK-E(baseline)22						Y	Y	Y	neg	neg	neg	neg
Nigeria	NK	NK-E(baseline)23						Y	Y	Y	neg	neg	neg	neg
Nigeria	NK	NK-E(baseline)24						N	N	N	NA	NA	NA	NA
Nigeria	NK	NK-E(baseline)25						Y	Y	Y	neg	neg	neg	neg
Nigeria	NK	NK-E(baseline)26						Y	Y	Y	P	neg	neg	neg
Nigeria	NK	NK-E(baseline)27						N	N	N	NA	NA	NA	NA
Nigeria	NK	NK-E(baseline)28						N	N	N	NA	NA	NA	NA
Nigeria	NK	NK-E(baseline)29						N	N	N	NA	NA	NA	NA
Nigeria	NK	NK-E(baseline)3	2017-07-21	Nursing Cup	Nurse's cup	healthcare workers&workstation	Patient's Zone	Y	Y	Y	P	neg	neg	neg
Nigeria	NK	NK-E(baseline)30						N	N	N	NA	NA	NA	NA
Nigeria	NK	NK-E(baseline)31						N	N	N	NA	NA	NA	NA
Nigeria	NK	NK-E(baseline)32						N	N	N	NA	NA	NA	NA
Nigeria	NK	NK-E(baseline)33						Y	N	N	NA	NA	NA	NA
Nigeria	NK	NK-E(baseline)34						Y	Y	Y	neg	neg	neg	neg
Nigeria	NK	NK-E(baseline)35						N	N	N	NA	NA	NA	NA
Nigeria	NK	NK-E(baseline)36						N	N	N	NA	NA	NA	NA
Nigeria	NK	NK-E(baseline)37						Y	Y	Y	neg	neg	neg	neg
Nigeria	NK	NK-E(baseline)38						Y	Y	Y	neg	neg	neg	neg
Nigeria	NK	NK-E(baseline)39						Y	Y	Y	neg	neg	neg	neg
Nigeria	NK	NK-E(baseline)4	2017-07-21	Syringe	Syringes	medical equipment	Medical Equipment	Y	Y	Y	P	neg	neg	neg
Nigeria	NK	NK-E(baseline)40						Y	Y	Y	neg	neg	neg	neg
Nigeria	NK	NK-E(baseline)41						Y	Y	Y	neg	neg	neg	neg
Nigeria	NK	NK-E(baseline)42						Y	Y	Y	neg	neg	neg	neg
Nigeria	NK	NK-E(baseline)43						N	N	N	NA	NA	NA	NA
Nigeria	NK	NK-E(baseline)44						Y	Y	Y	neg	neg	neg	neg
Nigeria	NK	NK-E(baseline)45						Y	Y	Y	neg	neg	neg	neg
Nigeria	NK	NK-E(baseline)46						Y	Y	Y	neg	neg	neg	neg
Nigeria	NK	NK-E(baseline)47						Y	Y	Y	neg	neg	neg	neg
Nigeria	NK	NK-E(baseline)48						N	N	N	NA	NA	NA	NA
Nigeria	NK	NK-E(baseline)49						Y	Y	Y	P	neg	neg	neg
Nigeria	NK	NK-E(baseline)5	2017-07-21	Weighing Scale	weighing scale	weighing scale/measuring tape	Patient's Zone	Y	Y	Y	neg	neg	neg	neg
Nigeria	NK	NK-E(baseline)50						Y	Y	Y	neg	neg	neg	neg
Nigeria	NK	NK-E(baseline)51						Y	Y	Y	P	neg	neg	neg
Nigeria	NK	NK-E(baseline)52						Y	Y	Y	neg	neg	neg	neg
Nigeria	NK	NK-E(baseline)53						Y	Y	Y	neg	neg	neg	neg
Nigeria	NK	NK-E(baseline)54						Y	Y	Y	neg	neg	neg	neg
Nigeria	NK	NK-E(baseline)55						Y	N	N	NA	NA	NA	NA
Nigeria	NK	NK-E(baseline)56						Y	Y	Y	P	neg	neg	neg
Nigeria	NK	NK-E(baseline)57						Y	Y	Y	P	neg	neg	neg
Nigeria	NK	NK-E(baseline)58						N	N	N	NA	NA	NA	NA
Nigeria	NK	NK-E(baseline)59						N	N	N	NA	NA	NA	NA
Nigeria	NK	NK-E(baseline)6	2017-07-21	Sink	Sink	basin/sink	Sinks and Water System	Y	Y	Y	neg	neg	neg	neg
Nigeria	NK	NK-E(baseline)60						Y	Y	Y	P	neg	neg	neg
Nigeria	NK	NK-E(baseline)61						Y	Y	Y	P	neg	neg	neg
Nigeria	NK	NK-E(baseline)62						N	N	N	NA	NA	NA	NA
Nigeria	NK	NK-E(baseline)63						Y	Y	N	P	NA	NA	NA
Nigeria	NK	NK-E(baseline)64						Y	Y	Y	neg	neg	neg	neg
Nigeria	NK	NK-E(baseline)65						Y	Y	Y	neg	neg	neg	neg
Nigeria	NK	NK-E(baseline)66						N	N	N	NA	NA	NA	NA
Nigeria	NK	NK-E(baseline)67						Y	Y	Y	neg	neg	neg	neg
Nigeria	NK	NK-E(baseline)68						Y	Y	Y	neg	neg	neg	neg
Nigeria	NK	NK-E(baseline)69						Y	Y	Y	P	neg	neg	neg
Nigeria	NK	NK-E(baseline)7	2017-07-21	Thermometer	Thermometer	medical equipment	Medical Equipment	Y	Y	Y	P	neg	neg	neg
Nigeria	NK	NK-E(baseline)70						Y	Y	Y	neg	neg	neg	neg
Nigeria	NK	NK-E(baseline)71						Y	Y	Y	neg	neg	neg	neg
Nigeria	NK	NK-E(baseline)72						Y	Y	Y	P	neg	neg	neg
Nigeria	NK	NK-E(baseline)73						Y	Y	Y	neg	neg	neg	neg
Nigeria	NK	NK-E(baseline)74						Y	Y	Y	neg	neg	neg	neg
Nigeria	NK	NK-E(baseline)75						Y	Y	Y	neg	neg	neg	neg
Nigeria	NK	NK-E(baseline)76						Y	Y	Y	neg	neg	neg	neg
Nigeria	NK	NK-E(baseline)77						Y	Y	Y	P	neg	neg	neg
Nigeria	NK	NK-E(baseline)78						Y	Y	Y	P	neg	neg	neg
Nigeria	NK	NK-E(baseline)79						Y	Y	N	P	NA	NA	NA
Nigeria	NK	NK-E(baseline)8	2017-07-21	Incubator Mattresss	Incubator mattress	incubators	Emergency Neonatal Care	Y	Y	Y	P	neg	neg	neg
Nigeria	NK	NK-E(baseline)80						Y	Y	Y	neg	neg	neg	neg
Nigeria	NK	NK-E(baseline)81						Y	Y	Y	P	neg	neg	neg
Nigeria	NK	NK-E(baseline)82						Y	Y	Y	neg	neg	neg	neg
Nigeria	NK	NK-E(baseline)83						Y	Y	Y	P	neg	neg	neg
Nigeria	NK	NK-E(baseline)84						Y	Y	Y	P	neg	neg	P
Nigeria	NK	NK-E(baseline)85						Y	Y	Y	neg	neg	neg	P
Nigeria	NK	NK-E(baseline)86						Y	Y	Y	P	P	neg	P
Nigeria	NK	NK-E(baseline)87						N	N	N	NA	NA	NA	NA
Nigeria	NK	NK-E(baseline)88						Y	Y	Y	neg	neg	neg	neg
Nigeria	NK	NK-E(baseline)89						Y	Y	Y	neg	neg	neg	neg
Nigeria	NK	NK-E(baseline)9	2017-07-21	Incubator	Incubator	incubators	Emergency Neonatal Care	Y	Y	Y	neg	neg	neg	neg
Nigeria	NK	NK-E(baseline)90						Y	Y	Y	neg	neg	neg	neg
Nigeria	NK	NK-E(baseline)91						Y	Y	Y	P	neg	neg	neg
Nigeria	NK	NK-E(baseline)92						N	N	N	NA	NA	NA	NA
Nigeria	NK	NK-E(baseline)93						Y	Y	Y	P	neg	neg	neg
Nigeria	NK	NK-E(baseline)94						Y	Y	Y	neg	neg	neg	neg
Nigeria	NK	NK-E(baseline)95						Y	Y	Y	neg	neg	neg	neg
Nigeria	NK	NK-E(baseline)96						Y	Y	Y	P	neg	neg	neg
Nigeria	NK	NK-E(baseline)97						Y	Y	Y	neg	neg	neg	neg
Nigeria	NK	NK-E(baseline)98						Y	Y	Y	neg	neg	neg	neg
Nigeria	NK	NK-E(baseline)99						Y	Y	Y	neg	neg	neg	neg
Nigeria	NK	NK-E1	2017-07-21	Mattress (Cot 1)	Mattress	ward furniture/surfaces	Ward Furniture/Surfaces	Y	Y	Y	P	neg	neg	neg
Nigeria	NK	NK-E10	2017-07-21	Soliset	NA			Y	Y	Y	neg	neg	neg	neg
Nigeria	NK	NK-E100	2017-07-15	NURSERY	weighing scale	weighing scale/measuring tape	Patient's Zone	Y	Y	Y	P	neg	neg	neg
Nigeria	NK	NK-E101	2017-07-15	NURSERY	Sink	basin/sink	Sinks and Water System	Y	Y	Y	P	neg	neg	neg
Nigeria	NK	NK-E102	2017-07-15	NURSERY	Baby's cot	areas/objects around the baby	Patient's Zone	Y	Y	Y	neg	neg	neg	neg
Nigeria	NK	NK-E103	2017-07-15	NURSERY	Phototherapy machine	phototherapy	Medical Equipment	Y	Y	Y	P	neg	neg	neg
Nigeria	NK	NK-E104	2017-07-15	NURSERY	Mother's Chair	areas/objects around the mother	Patient's Zone	Y	Y	Y	P	neg	neg	neg
Nigeria	NK	NK-E105	2017-07-15	NURSERY	Medication table	ward furniture/surfaces	Ward Furniture/Surfaces	Y	Y	Y	P	neg	neg	neg
Nigeria	NK	NK-E106	2017-07-15	EPU	Bed	ward furniture/surfaces	Patient's Zone	Y	Y	Y	P	neg	neg	neg
Nigeria	NK	NK-E107	2017-07-15	EPU	Trolley	mobile medical equipment	Mobile Medical Equipment	Y	Y	Y	P	neg	neg	neg
Nigeria	NK	NK-E108	2017-07-15	EPU	Oxygen Concentrator	Oxygen therapy	Mobile Medical Equipment	Y	Y	Y	P	neg	neg	neg
Nigeria	NK	NK-E109	2017-07-15	EPU	Medication cabinet	medical equipment	Medical Equipment	Y	Y	Y	P	neg	neg	neg
Nigeria	NK	NK-E11	2017-07-21	Nursing Bucket	Nurse's bucket	healthcare workers&workstation	Patient's Zone	Y	N	Y	NA	neg	neg	neg
Nigeria	NK	NK-E110	2017-07-15	EPU	NA			Y	Y	Y	neg	neg	neg	neg
Nigeria	NK	NK-E111	2017-07-15	EPU	Resuscitaire couch	radiant warmers& resuscitation room	Emergency Neonatal Care	Y	Y	Y	P	neg	neg	neg
Nigeria	NK	NK-E112	2017-07-15	EPU	Fridge	medical equipment	Medical Equipment	Y	Y	Y	P	neg	neg	neg
Nigeria	NK	NK-E113	2017-07-15	EPU	NA			Y	Y	Y	P	neg	neg	neg
Nigeria	NK	NK-E114	2017-07-15	EPU	Basin	basin/sink	Sinks and Water System	Y	Y	Y	P	P	neg	neg
Nigeria	NK	NK-E115	2017-07-15	EPU	weighing scale	weighing scale/measuring tape	Patient's Zone	Y	Y	Y	P	neg	neg	neg
Nigeria	NK	NK-E116						Y	Y	N	neg	NA	NA	NA
Nigeria	NK	NK-E117						Y	Y	N	neg	NA	NA	NA
Nigeria	NK	NK-E118						Y	Y	N	P	NA	NA	NA
Nigeria	NK	NK-E119						Y	Y	N	neg	NA	NA	NA
Nigeria	NK	NK-E12	2017-07-21	Incubator Mattresss	Incubator mattress	incubators	Emergency Neonatal Care	Y	Y	Y	neg	neg	neg	neg
Nigeria	NK	NK-E120						Y	Y	Y	neg	neg	neg	neg
Nigeria	NK	NK-E121						Y	Y	Y	neg	neg	neg	neg
Nigeria	NK	NK-E122						Y	Y	Y	neg	neg	neg	neg
Nigeria	NK	NK-E123						Y	Y	Y	P	P	neg	neg
Nigeria	NK	NK-E124						Y	Y	N	neg	NA	NA	NA
Nigeria	NK	NK-E125						Y	Y	N	neg	NA	NA	NA
Nigeria	NK	NK-E126						Y	Y	N	P	NA	NA	NA
Nigeria	NK	NK-E127						N	N	N	NA	NA	NA	NA
Nigeria	NK	NK-E128						Y	Y	Y	neg	neg	neg	neg
Nigeria	NK	NK-E129						Y	Y	Y	P	P	neg	neg
Nigeria	NK	NK-E13	2017-07-21	Incubator	Incubator	incubators	Emergency Neonatal Care	Y	Y	Y	neg	neg	neg	neg
Nigeria	NK	NK-E130						Y	Y	Y	neg	P	neg	neg
Nigeria	NK	NK-E131(2)						Y	Y	Y	neg	neg	neg	neg
Nigeria	NK	NK-E132						Y	Y	N	neg	NA	NA	NA
Nigeria	NK	NK-E133						Y	Y	N	neg	NA	NA	NA
Nigeria	NK	NK-E134						Y	Y	N	neg	NA	NA	NA
Nigeria	NK	NK-E135						Y	Y	N	neg	NA	NA	NA
Nigeria	NK	NK-E136						Y	Y	N	neg	NA	NA	NA
Nigeria	NK	NK-E137						Y	Y	N	neg	NA	NA	NA
Nigeria	NK	NK-E138						Y	Y	N	neg	NA	NA	NA
Nigeria	NK	NK-E139						Y	Y	N	P	NA	NA	NA
Nigeria	NK	NK-E14	2017-07-21	Soliset	NA			Y	Y	Y	P	neg	neg	neg
Nigeria	NK	NK-E140						Y	Y	N	neg	NA	NA	NA
Nigeria	NK	NK-E141						Y	Y	N	neg	NA	NA	NA
Nigeria	NK	NK-E142						Y	Y	N	neg	NA	NA	NA
Nigeria	NK	NK-E143						Y	Y	N	neg	NA	NA	NA
Nigeria	NK	NK-E144						Y	Y	N	neg	NA	NA	NA
Nigeria	NK	NK-E145						Y	Y	N	neg	NA	NA	NA
Nigeria	NK	NK-E146						Y	Y	N	P	NA	NA	NA
Nigeria	NK	NK-E147						Y	Y	N	neg	NA	NA	NA
Nigeria	NK	NK-E148						Y	Y	N	P	NA	NA	NA
Nigeria	NK	NK-E149						Y	Y	N	P	NA	NA	NA
Nigeria	NK	NK-E15	2017-07-21	Mother's Chair	Mother's Chair	areas/objects around the mother	Patient's Zone	Y	Y	Y	P	neg	neg	neg
Nigeria	NK	NK-E150						Y	Y	N	neg	NA	NA	NA
Nigeria	NK	NK-E151						Y	Y	N	P	NA	NA	NA
Nigeria	NK	NK-E152						Y	Y	Y	P	neg	neg	neg
Nigeria	NK	NK-E153						Y	Y	Y	neg	neg	neg	neg
Nigeria	NK	NK-E154						Y	Y	N	P	NA	NA	NA
Nigeria	NK	NK-E155						Y	Y	Y	neg	neg	neg	neg
Nigeria	NK	NK-E156						Y	Y	Y	neg	neg	neg	neg
Nigeria	NK	NK-E157						Y	Y	Y	neg	neg	neg	neg
Nigeria	NK	NK-E158						Y	Y	Y	neg	neg	neg	neg
Nigeria	NK	NK-E159						Y	Y	Y	P	neg	neg	neg
Nigeria	NK	NK-E16	2017-07-21	Nursing Bucket	Nurse's bucket	healthcare workers&workstation	Patient's Zone	Y	Y	Y	neg	neg	neg	neg
Nigeria	NK	NK-E160						Y	Y	Y	P	neg	neg	neg
Nigeria	NK	NK-E161						Y	Y	Y	P	neg	neg	neg
Nigeria	NK	NK-E162						Y	Y	Y	P	neg	neg	neg
Nigeria	NK	NK-E163						Y	Y	Y	P	neg	neg	neg
Nigeria	NK	NK-E164						Y	Y	Y	P	neg	neg	neg
Nigeria	NK	NK-E165						Y	Y	Y	neg	neg	neg	neg
Nigeria	NK	NK-E166						Y	Y	Y	P	P	neg	neg
Nigeria	NK	NK-E167						Y	Y	Y	P	neg	neg	neg
Nigeria	NK	NK-E168						Y	Y	Y	P	P	neg	neg
Nigeria	NK	NK-E169						Y	Y	Y	neg	neg	neg	neg
Nigeria	NK	NK-E17	2017-07-21	Resuscitaire	Resuscitaire	radiant warmers& resuscitation room	Emergency Neonatal Care	Y	N	Y	NA	neg	neg	neg
Nigeria	NK	NK-E170						Y	Y	Y	neg	neg	neg	neg
Nigeria	NK	NK-E171						Y	Y	Y	P	neg	neg	neg
Nigeria	NK	NK-E172						Y	Y	Y	neg	P	neg	neg
Nigeria	NK	NK-E173						Y	Y	Y	neg	neg	neg	neg
Nigeria	NK	NK-E174						Y	Y	Y	neg	P	neg	neg
Nigeria	NK	NK-E175						Y	Y	Y	neg	neg	neg	neg
Nigeria	NK	NK-E176						Y	Y	N	P	NA	NA	NA
Nigeria	NK	NK-E177						Y	Y	Y	neg	neg	neg	neg
Nigeria	NK	NK-E178						Y	Y	Y	neg	neg	neg	neg
Nigeria	NK	NK-E179						Y	Y	Y	P	neg	neg	neg
Nigeria	NK	NK-E18	2017-07-21	Oxygen Concentrator	Oxygen Concentrator	Oxygen therapy	Mobile Medical Equipment	Y	N	Y	NA	neg	neg	neg
Nigeria	NK	NK-E180						Y	N	N	NA	NA	NA	NA
Nigeria	NK	NK-E181						Y	Y	N	neg	NA	NA	NA
Nigeria	NK	NK-E182						Y	Y	Y	neg	neg	neg	neg
Nigeria	NK	NK-E183						Y	Y	N	neg	NA	NA	NA
Nigeria	NK	NK-E184						Y	Y	Y	neg	neg	neg	neg
Nigeria	NK	NK-E185						Y	Y	Y	P	neg	neg	neg
Nigeria	NK	NK-E186						Y	Y	N	neg	NA	NA	NA
Nigeria	NK	NK-E187						Y	Y	N	P	NA	NA	NA
Nigeria	NK	NK-E188						Y	Y	Y	P	neg	neg	neg
Nigeria	NK	NK-E189						Y	Y	Y	P	neg	neg	neg
Nigeria	NK	NK-E19	2017-07-21	BARNARDS Thermometer	Thermometer	medical equipment	Medical Equipment	Y	Y	Y	neg	neg	neg	neg
Nigeria	NK	NK-E190						Y	Y	Y	neg	neg	neg	neg
Nigeria	NK	NK-E191						Y	Y	Y	neg	P	neg	neg
Nigeria	NK	NK-E192						Y	Y	Y	neg	neg	neg	neg
Nigeria	NK	NK-E193						Y	Y	Y	P	P	neg	neg
Nigeria	NK	NK-E194						Y	Y	Y	P	P	neg	neg
Nigeria	NK	NK-E195						Y	Y	Y	neg	neg	neg	neg
Nigeria	NK	NK-E196						Y	Y	N	P	NA	NA	NA
Nigeria	NK	NK-E197						N	N	N	NA	NA	NA	NA
Nigeria	NK	NK-E198						N	N	N	NA	NA	NA	NA
Nigeria	NK	NK-E199						Y	Y	Y	neg	P	neg	neg
Nigeria	NK	NK-E2	2017-07-21	Cot 1	Cot	ward furniture/surfaces	Patient's Zone	Y	Y	Y	neg	neg	neg	neg
Nigeria	NK	NK-E20	2017-07-21	BARNARDS Table	Table	ward furniture/surfaces	Ward Furniture/Surfaces	Y	Y	Y	neg	neg	neg	neg
Nigeria	NK	NK-E200						Y	Y	N	neg	NA	NA	NA
Nigeria	NK	NK-E201						Y	Y	N	P	NA	NA	NA
Nigeria	NK	NK-E202						Y	Y	N	P	NA	NA	NA
Nigeria	NK	NK-E203						Y	Y	N	neg	NA	NA	NA
Nigeria	NK	NK-E204						Y	Y	N	neg	NA	NA	NA
Nigeria	NK	NK-E205						Y	Y	N	neg	NA	NA	NA
Nigeria	NK	NK-E206						Y	Y	N	P	NA	NA	NA
Nigeria	NK	NK-E207						Y	Y	Y	neg	neg	neg	neg
Nigeria	NK	NK-E208						Y	Y	Y	P	neg	neg	neg
Nigeria	NK	NK-E209						Y	Y	Y	neg	neg	neg	neg
Nigeria	NK	NK-E21	2017-07-21	Medication Cabinet	Medication cabinet	medical equipment	Medical Equipment	Y	Y	Y	P	neg	neg	neg
Nigeria	NK	NK-E210						Y	Y	Y	P	neg	neg	neg
Nigeria	NK	NK-E211						Y	Y	Y	neg	neg	neg	neg
Nigeria	NK	NK-E212						Y	Y	Y	neg	neg	neg	neg
Nigeria	NK	NK-E213						Y	Y	Y	P	P	neg	neg
Nigeria	NK	NK-E214						Y	Y	Y	P	neg	neg	neg
Nigeria	NK	NK-E215						Y	Y	Y	P	P	neg	neg
Nigeria	NK	NK-E216						Y	Y	Y	P	P	neg	neg
Nigeria	NK	NK-E217						Y	Y	Y	neg	neg	neg	neg
Nigeria	NK	NK-E218						Y	Y	Y	neg	neg	neg	neg
Nigeria	NK	NK-E219						Y	Y	Y	neg	P	neg	neg
Nigeria	NK	NK-E22	2017-07-21	Oxygen Concentrator	Oxygen Concentrator	Oxygen therapy	Mobile Medical Equipment	Y	Y	Y	P	neg	neg	neg
Nigeria	NK	NK-E220						Y	Y	Y	P	P	neg	neg
Nigeria	NK	NK-E221						Y	Y	Y	neg	P	neg	neg
Nigeria	NK	NK-E222						Y	Y	Y	neg	neg	neg	neg
Nigeria	NK	NK-E223						Y	Y	N	neg	NA	NA	NA
Nigeria	NK	NK-E224						Y	Y	Y	neg	neg	neg	neg
Nigeria	NK	NK-E225						N	N	N	NA	NA	NA	NA
Nigeria	NK	NK-E226						Y	Y	Y	neg	neg	neg	neg
Nigeria	NK	NK-E227						Y	Y	Y	neg	neg	neg	neg
Nigeria	NK	NK-E228						Y	Y	Y	neg	neg	neg	neg
Nigeria	NK	NK-E229						Y	Y	Y	neg	neg	neg	neg
Nigeria	NK	NK-E230						Y	Y	Y	P	neg	neg	neg
Nigeria	NK	NK-E231						Y	Y	Y	P	neg	neg	neg
Nigeria	NK	NK-E232						Y	Y	N	P	NA	NA	NA
Nigeria	NK	NK-E233						Y	Y	Y	P	neg	neg	neg
Nigeria	NK	NK-E234						Y	Y	Y	neg	neg	neg	neg
Nigeria	NK	NK-E235						Y	Y	Y	neg	neg	neg	neg
Nigeria	NK	NK-E236						Y	Y	N	neg	NA	NA	NA
Nigeria	NK	NK-E237						Y	Y	N	P	NA	NA	NA
Nigeria	NK	NK-E238						Y	Y	N	neg	NA	NA	NA
Nigeria	NK	NK-E239						Y	Y	Y	neg	neg	neg	neg
Nigeria	NK	NK-E24	2017-07-21	Mattress	Mattress	ward furniture/surfaces	Ward Furniture/Surfaces	Y	Y	Y	P	neg	neg	neg
Nigeria	NK	NK-E240						Y	Y	N	P	NA	NA	NA
Nigeria	NK	NK-E241						Y	Y	Y	P	neg	neg	neg
Nigeria	NK	NK-E242						Y	Y	Y	neg	neg	neg	neg
Nigeria	NK	NK-E243						Y	Y	N	P	NA	NA	NA
Nigeria	NK	NK-E244						Y	Y	Y	P	neg	neg	neg
Nigeria	NK	NK-E245						Y	Y	Y	P	neg	neg	neg
Nigeria	NK	NK-E246						Y	Y	N	neg	NA	NA	NA
Nigeria	NK	NK-E247						Y	Y	N	neg	NA	NA	NA
Nigeria	NK	NK-E248						Y	Y	Y	P	neg	neg	neg
Nigeria	NK	NK-E249						Y	Y	Y	P	P	neg	neg
Nigeria	NK	NK-E25	2017-07-21	Retord stand	Retort stand	medical equipment	Medical Equipment	Y	Y	Y	P	neg	neg	neg
Nigeria	NK	NK-E250						Y	Y	N	neg	NA	NA	NA
Nigeria	NK	NK-E251						Y	Y	Y	P	neg	neg	neg
Nigeria	NK	NK-E252						Y	Y	Y	P	neg	neg	neg
Nigeria	NK	NK-E253						Y	Y	N	neg	NA	NA	NA
Nigeria	NK	NK-E254						Y	Y	Y	P	P	neg	neg
Nigeria	NK	NK-E255						Y	Y	N	P	NA	NA	NA
Nigeria	NK	NK-E256						Y	N	N	NA	NA	NA	NA
Nigeria	NK	NK-E257						N	N	N	NA	NA	NA	NA
Nigeria	NK	NK-E258						Y	Y	N	P	NA	NA	NA
Nigeria	NK	NK-E259						Y	Y	Y	neg	neg	neg	neg
Nigeria	NK	NK-E26	2017-07-17	SINK	Sink	basin/sink	Sinks and Water System	Y	Y	Y	neg	neg	neg	P
Nigeria	NK	NK-E260						Y	Y	N	P	NA	NA	NA
Nigeria	NK	NK-E261						Y	Y	N	P	NA	NA	NA
Nigeria	NK	NK-E262						Y	Y	N	P	NA	NA	NA
Nigeria	NK	NK-E263						Y	Y	N	neg	NA	NA	NA
Nigeria	NK	NK-E264						Y	N	Y	NA	neg	neg	neg
Nigeria	NK	NK-E265						Y	N	N	NA	NA	NA	NA
Nigeria	NK	NK-E266						Y	N	N	NA	NA	NA	NA
Nigeria	NK	NK-E267						Y	N	N	NA	NA	NA	NA
Nigeria	NK	NK-E268						Y	Y	N	neg	NA	NA	NA
Nigeria	NK	NK-E269						Y	Y	Y	neg	neg	neg	neg
Nigeria	NK	NK-E27	2017-07-17	WEIGHING SCALE	weighing scale	weighing scale/measuring tape	Patient's Zone	Y	Y	Y	neg	neg	neg	neg
Nigeria	NK	NK-E270						Y	Y	N	neg	NA	NA	NA
Nigeria	NK	NK-E271						N	N	N	NA	NA	NA	NA
Nigeria	NK	NK-E272						Y	Y	Y	neg	neg	neg	neg
Nigeria	NK	NK-E273						Y	Y	Y	P	neg	neg	neg
Nigeria	NK	NK-E274						Y	Y	N	neg	NA	NA	NA
Nigeria	NK	NK-E275						Y	Y	N	P	NA	NA	NA
Nigeria	NK	NK-E28	2017-07-17	KIDNEY DISH	kidney dish	medical equipment	Medical Equipment	Y	Y	Y	neg	neg	neg	neg
Nigeria	NK	NK-E29	2017-07-17	TROLEY	Trolley	mobile medical equipment	Mobile Medical Equipment	Y	N	Y	NA	neg	neg	neg
Nigeria	NK	NK-E3	2017-07-21	Nursing Cup	Nurse's cup	healthcare workers&workstation	Patient's Zone	Y	Y	Y	P	neg	neg	neg
Nigeria	NK	NK-E30	2017-07-17	DRIP STAND	intravenous (IV) line and accessories	medical equipment	Medical Equipment	Y	N	Y	NA	neg	neg	neg
Nigeria	NK	NK-E31	2017-07-17	MATTRESS	Mattress	ward furniture/surfaces	Ward Furniture/Surfaces	Y	N	Y	NA	neg	neg	neg
Nigeria	NK	NK-E32	2017-07-17	BED PAD(DISH)	Bed pan	ward furniture/surfaces	Medical Equipment	Y	N	Y	NA	neg	neg	neg
Nigeria	NK	NK-E33	2017-07-17	TABLE	Table	ward furniture/surfaces	Ward Furniture/Surfaces	Y	N	Y	NA	neg	neg	neg
Nigeria	NK	NK-E34	2017-07-17	BP APPARATUS	stethoscope and sphygmomanometer	medical equipment	Medical Equipment	Y	N	Y	NA	neg	neg	neg
Nigeria	NK	NK-E35	2017-07-17	SUTURE TABLE	Suture material table	ward furniture/surfaces	Ward Furniture/Surfaces	Y	N	Y	NA	neg	neg	neg
Nigeria	NK	NK-E36	2017-07-17	BABY WARMER	Baby radiant warmer	radiant warmers& resuscitation room	Emergency Neonatal Care	Y	Y	Y	P	neg	neg	neg
Nigeria	NK	NK-E37	2017-07-17	TROLEY	Trolley	mobile medical equipment	Mobile Medical Equipment	Y	Y	Y	ND	neg	neg	neg
Nigeria	NK	NK-E38	2017-07-17	DRIP STAND	intravenous (IV) line and accessories	medical equipment	Medical Equipment	Y	Y	Y	P	P	neg	neg
Nigeria	NK	NK-E39	2017-07-17	BED	Bed	ward furniture/surfaces	Patient's Zone	Y	Y	Y	neg	neg	neg	neg
Nigeria	NK	NK-E4	2017-07-21	Syringe	Syringes	medical equipment	Medical Equipment	Y	Y	Y	P	neg	neg	neg
Nigeria	NK	NK-E40	2017-07-17	BP APPARATUS	stethoscope and sphygmomanometer	medical equipment	Medical Equipment	Y	Y	Y	P	neg	neg	neg
Nigeria	NK	NK-E41	2017-07-17	DRUM	NA			Y	Y	Y	P	neg	neg	neg
Nigeria	NK	NK-E42	2017-07-17	EXAMINATION BED	Examination bed	ward furniture/surfaces	Patient's Zone	Y	Y	Y	P	neg	neg	neg
Nigeria	NK	NK-E43	2017-07-17	BED	Bed	ward furniture/surfaces	Patient's Zone	Y	Y	Y	neg	neg	neg	neg
Nigeria	NK	NK-E44	2017-07-17	MATTRESS	Mattress	ward furniture/surfaces	Ward Furniture/Surfaces	Y	Y	Y	neg	neg	neg	neg
Nigeria	NK	NK-E45	2017-07-17	EXAMINATION BED	Examination bed	ward furniture/surfaces	Patient's Zone	Y	Y	Y	neg	neg	neg	neg
Nigeria	NK	NK-E46	2017-07-17	TROLEY	Trolley	mobile medical equipment	Mobile Medical Equipment	Y	Y	Y	P	neg	neg	neg
Nigeria	NK	NK-E47	2017-07-17	MATTRESS	Mattress	ward furniture/surfaces	Ward Furniture/Surfaces	Y	Y	Y	neg	neg	neg	neg
Nigeria	NK	NK-E48	2017-07-17	DRIP STAND	intravenous (IV) line and accessories	medical equipment	Medical Equipment	Y	Y	Y	neg	neg	neg	neg
Nigeria	NK	NK-E5	2017-07-21	Weighing Scale	weighing scale	weighing scale/measuring tape	Patient's Zone	Y	Y	Y	neg	neg	neg	neg
Nigeria	NK	NK-E50	2017-07-17	BP APPARATUS	stethoscope and sphygmomanometer	medical equipment	Medical Equipment	Y	Y	Y	neg	neg	neg	neg
Nigeria	NK	NK-E51	2017-07-25	NG- Tube	cannula&catheter&prong&tubes	medical equipment	Medical Equipment	Y	Y	Y	P	neg	neg	neg
Nigeria	NK	NK-E52	2017-07-25	Mattress	Mattress	ward furniture/surfaces	Ward Furniture/Surfaces	Y	Y	Y	P	neg	neg	neg
Nigeria	NK	NK-E53	2017-07-25	Central line	intravenous (IV) line and accessories	medical equipment	Medical Equipment	Y	Y	Y	P	neg	neg	neg
Nigeria	NK	NK-E54	2017-07-25	Phototherapy switch	Phototherapy switch	phototherapy	Medical Equipment	Y	Y	Y	neg	neg	neg	neg
Nigeria	NK	NK-E55	2017-07-25	Mattress	Mattress	ward furniture/surfaces	Ward Furniture/Surfaces	Y	Y	Y	P	neg	neg	neg
Nigeria	NK	NK-E56	2017-07-25	Central line	intravenous (IV) line and accessories	medical equipment	Medical Equipment	Y	Y	Y	neg	neg	neg	neg
Nigeria	NK	NK-E57	2017-07-25	Soliset	NA			Y	Y	Y	P	neg	neg	neg
Nigeria	NK	NK-E58	2017-07-25	Mattress	Mattress	ward furniture/surfaces	Ward Furniture/Surfaces	Y	Y	Y	P	neg	neg	neg
Nigeria	NK	NK-E59	2017-07-25	Incubator Mattress	Incubator mattress	incubators	Emergency Neonatal Care	Y	Y	Y	P	neg	neg	neg
Nigeria	NK	NK-E6	2017-07-21	Sink	Sink	basin/sink	Sinks and Water System	Y	Y	Y	P	neg	neg	neg
Nigeria	NK	NK-E60	2017-07-25	Soliset	NA			Y	Y	Y	neg	neg	neg	neg
Nigeria	NK	NK-E61	2017-07-25	Stethoscope	stethoscope and sphygmomanometer	medical equipment	Medical Equipment	Y	Y	Y	neg	neg	neg	neg
Nigeria	NK	NK-E62	2017-07-25	weighing scale	weighing scale	weighing scale/measuring tape	Patient's Zone	Y	Y	Y	P	neg	neg	neg
Nigeria	NK	NK-E63	2017-07-25	Glucometer	Glucometer	medical equipment	Medical Equipment	Y	Y	Y	neg	neg	neg	neg
Nigeria	NK	NK-E64	2017-07-25	Drug Pounding mortar and pistle	drug pounding mortar and pestle	medical equipment	Medical Equipment	Y	Y	Y	P	P	neg	neg
Nigeria	NK	NK-E65	2017-07-25	Thermometer	Thermometer	medical equipment	Medical Equipment	Y	Y	Y	P	neg	neg	neg
Nigeria	NK	NK-E66	2017-07-25	Tape	Measuring tape	weighing scale/measuring tape	Patient's Zone	Y	Y	Y	P	neg	neg	neg
Nigeria	NK	NK-E67	2017-07-25	Radiant warmer	Radiant warmer	radiant warmers& resuscitation room	Emergency Neonatal Care	Y	Y	Y	P	neg	neg	neg
Nigeria	NK	NK-E68	2017-07-25	Soliset	NA			Y	Y	Y	P	neg	neg	neg
Nigeria	NK	NK-E69	2017-07-25	Mattress	Mattress	ward furniture/surfaces	Ward Furniture/Surfaces	Y	Y	Y	P	neg	neg	neg
Nigeria	NK	NK-E7	2017-07-21	Thermometer	Thermometer	medical equipment	Medical Equipment	Y	Y	Y	neg	neg	neg	neg
Nigeria	NK	NK-E70	2017-07-25	Ambu bag	Ambu bag (bag valve mask) and accessories	medical equipment	Medical Equipment	Y	Y	Y	P	neg	neg	neg
Nigeria	NK	NK-E71	2017-07-25	Suture Bed	Suture bed	ward furniture/surfaces	Patient's Zone	Y	Y	Y	neg	neg	neg	neg
Nigeria	NK	NK-E72	2017-07-25	Bed Pan	Bed pan	ward furniture/surfaces	Medical Equipment	Y	Y	Y	neg	neg	neg	neg
Nigeria	NK	NK-E73	2017-07-25	Mattress	Mattress	ward furniture/surfaces	Ward Furniture/Surfaces	Y	Y	Y	P	neg	neg	neg
Nigeria	NK	NK-E74	2017-07-25	Bed	Bed	ward furniture/surfaces	Patient's Zone	Y	Y	Y	neg	neg	neg	neg
Nigeria	NK	NK-E75	2017-07-25	Examination Bed	Examination bed	ward furniture/surfaces	Patient's Zone	Y	Y	Y	neg	neg	neg	neg
Nigeria	NK	NK-E76	2017-07-25	Troley	Trolley	mobile medical equipment	Mobile Medical Equipment	Y	Y	Y	neg	neg	neg	neg
Nigeria	NK	NK-E77	2017-07-25	Mattress	Mattress	ward furniture/surfaces	Ward Furniture/Surfaces	Y	Y	Y	neg	P	neg	neg
Nigeria	NK	NK-E78	2017-07-25	Weighing Scale	weighing scale	weighing scale/measuring tape	Patient's Zone	Y	Y	Y	neg	neg	neg	neg
Nigeria	NK	NK-E79	2017-07-25	Dustbin	Dustbin	ward furniture/surfaces	Ward Furniture/Surfaces	Y	Y	Y	P	neg	neg	neg
Nigeria	NK	NK-E8	2017-07-21	Incubator Mattresss	Incubator mattress	incubators	Emergency Neonatal Care	Y	Y	Y	neg	neg	neg	neg
Nigeria	NK	NK-E80	2017-07-25	Fridge	Fridge	medical equipment	Medical Equipment	Y	Y	Y	P	neg	neg	neg
Nigeria	NK	NK-E81	2017-07-25	Suture Bed	Suture bed	ward furniture/surfaces	Patient's Zone	Y	Y	Y	P	neg	neg	neg
Nigeria	NK	NK-E83	2017-07-25	Examination Bed	Examination bed	ward furniture/surfaces	Patient's Zone	Y	Y	Y	neg	neg	neg	neg
Nigeria	NK	NK-E84	2017-07-25	Troley	Trolley	mobile medical equipment	Mobile Medical Equipment	Y	Y	Y	P	P	neg	neg
Nigeria	NK	NK-E85	2017-07-25	Matress	Mattress	ward furniture/surfaces	Ward Furniture/Surfaces	Y	Y	Y	P	neg	neg	neg
Nigeria	NK	NK-E86	2017-07-25	BP Apparatus	stethoscope and sphygmomanometer	medical equipment	Medical Equipment	Y	Y	Y	neg	P	neg	neg
Nigeria	NK	NK-E87	2017-07-25	Drum	NA			Y	Y	Y	neg	neg	neg	neg
Nigeria	NK	NK-E88	2017-07-25	Drip Stand	intravenous (IV) line and accessories	medical equipment	Medical Equipment	Y	Y	Y	neg	neg	neg	neg
Nigeria	NK	NK-E89	2017-07-25	Troley	Trolley	mobile medical equipment	Mobile Medical Equipment	Y	Y	Y	P	neg	neg	neg
Nigeria	NK	NK-E9	2017-07-21	Incubator	Incubator	incubators	Emergency Neonatal Care	Y	Y	Y	P	neg	neg	neg
Nigeria	NK	NK-E90	2017-07-25	Mattress	Mattress	ward furniture/surfaces	Ward Furniture/Surfaces	Y	Y	Y	P	neg	neg	neg
Nigeria	NK	NK-E91	2017-07-15	NURSERY	Incubator bed	incubators	Emergency Neonatal Care	Y	Y	Y	neg	neg	neg	neg
Nigeria	NK	NK-E92	2017-07-15	NURSERY	Incubator	incubators	Emergency Neonatal Care	Y	Y	Y	P	neg	neg	neg
Nigeria	NK	NK-E93	2017-07-15	NURSERY	Resuscitaire	radiant warmers& resuscitation room	Emergency Neonatal Care	Y	Y	Y	P	neg	neg	neg
Nigeria	NK	NK-E94	2017-07-15	NURSERY	medical suction machine	mobile medical equipment	Mobile Medical Equipment	Y	Y	Y	P	P	neg	neg
Nigeria	NK	NK-E95	2017-07-15	NURSERY	Glucometer	medical equipment	Medical Equipment	Y	Y	Y	neg	neg	neg	neg
Nigeria	NK	NK-E96	2017-07-15	NURSERY	weighing scale	weighing scale/measuring tape	Patient's Zone	Y	Y	Y	neg	neg	neg	neg
Nigeria	NK	NK-E97	2017-07-15	NURSERY	stethoscope and sphygmomanometer	medical equipment	Medical Equipment	Y	Y	Y	neg	neg	neg	neg
Nigeria	NK	NK-E98	2017-07-15	NURSERY	Thermometer	medical equipment	Medical Equipment	Y	Y	Y	neg	neg	neg	neg
Nigeria	NK	NK-E99	2017-07-15	NURSERY	Table	ward furniture/surfaces	Ward Furniture/Surfaces	Y	Y	Y	neg	neg	neg	neg
Nigeria	NN	NN-E1	2015-11-26	MILK ROOM TRAY	Milk room tray	milk	Patient's Zone	N	N	N	NA	NA	NA	NA
Nigeria	NN	NN-E10	2015-11-26	DELIVERY BED MATRESS	Delivery mattress	ward furniture/surfaces	Ward Furniture/Surfaces	N	N	N	NA	NA	NA	NA
Nigeria	NN	NN-E100	2016-01-18	EMPTY REUSABLE SHARP BOX	Sharps container	ward furniture/surfaces	Ward Furniture/Surfaces	Y	Y	N	neg	NA	NA	NA
Nigeria	NN	NN-E101	2016-01-18	FRIDGE	Fridge	medical equipment	Medical Equipment	N	N	N	NA	NA	NA	NA
Nigeria	NN	NN-E102	2016-01-18	RESUCITAIRE	Resuscitaire	radiant warmers& resuscitation room	Emergency Neonatal Care	Y	Y	Y	neg	neg	neg	neg
Nigeria	NN	NN-E103	2016-01-18	RESUCITAIRE	Resuscitaire	radiant warmers& resuscitation room	Emergency Neonatal Care	N	N	N	NA	NA	NA	NA
Nigeria	NN	NN-E104	2016-01-18	OXYGEN DELIVERY TUBE	Oxygen tube	Oxygen therapy	Mobile Medical Equipment	N	N	N	NA	NA	NA	NA
Nigeria	NN	NN-E105	2016-01-18	MEDICATION TRAY	medication tray	mobile medical equipment	Mobile Medical Equipment	Y	Y	Y	neg	neg	neg	neg
Nigeria	NN	NN-E106	2016-01-18	SAMPLE TROLLEY	Trolley	mobile medical equipment	Mobile Medical Equipment	Y	Y	Y	neg	neg	neg	neg
Nigeria	NN	NN-E107	2016-01-18	MATTRESS	Mattress	ward furniture/surfaces	Ward Furniture/Surfaces	N	N	N	NA	NA	NA	NA
Nigeria	NN	NN-E108	2016-01-18	RESUCITAIRE	Resuscitaire	radiant warmers& resuscitation room	Emergency Neonatal Care	N	N	N	NA	NA	NA	NA
Nigeria	NN	NN-E109	2016-01-18	NURSING STATION	NA			N	N	N	NA	NA	NA	NA
Nigeria	NN	NN-E11	2015-11-26	HANDWASH SINK	Sink	basin/sink	Sinks and Water System	N	N	N	NA	NA	NA	NA
Nigeria	NN	NN-E110	2016-01-18	DELIVERY ITEM TROLLEY	delivery trolley	mobile medical equipment	Mobile Medical Equipment	N	N	N	NA	NA	NA	NA
Nigeria	NN	NN-E111	2016-01-18	KIDNEY DISH	kidney dish	medical equipment	Medical Equipment	Y	Y	Y	neg	neg	neg	neg
Nigeria	NN	NN-E112	2016-01-18	BEDSIDE PAN	Bed pan	ward furniture/surfaces	Medical Equipment	N	N	N	NA	NA	NA	NA
Nigeria	NN	NN-E113	2016-01-18	MATTRESS	Mattress	ward furniture/surfaces	Ward Furniture/Surfaces	N	N	N	NA	NA	NA	NA
Nigeria	NN	NN-E114	2016-01-18	MATTRESS	Mattress	ward furniture/surfaces	Ward Furniture/Surfaces	N	N	N	NA	NA	NA	NA
Nigeria	NN	NN-E115	2016-01-18	MEDICATION DRAWER	Medication drawer	ward furniture/surfaces	Ward Furniture/Surfaces	N	N	N	NA	NA	NA	NA
Nigeria	NN	NN-E116	2016-01-18	INFANT CVS MONITOR	Infant CVS monitor	monitors	Mobile Medical Equipment	N	N	N	NA	NA	NA	NA
Nigeria	NN	NN-E117	2016-01-27	INCUBATOR ONE	Incubator	incubators	Emergency Neonatal Care	N	N	N	NA	NA	NA	NA
Nigeria	NN	NN-E118	2016-01-27	RESCUCITAIRE	Resuscitaire	radiant warmers& resuscitation room	Emergency Neonatal Care	N	N	N	NA	NA	NA	NA
Nigeria	NN	NN-E119	2016-01-27	SINK FOR WASHING BABIES	Bathing sink	basin/sink	Sinks and Water System	Y	Y	Y	neg	neg	neg	neg
Nigeria	NN	NN-E12	2015-11-26	BED PAN	Bed pan	ward furniture/surfaces	Medical Equipment	N	N	N	NA	NA	NA	NA
Nigeria	NN	NN-E120	2016-01-27	MEDICATION TROLLEY	medication trolley	mobile medical equipment	Mobile Medical Equipment	N	N	N	NA	NA	NA	NA
Nigeria	NN	NN-E121	2016-01-27	INCUBATOR TWO	Incubator	incubators	Emergency Neonatal Care	N	N	N	NA	NA	NA	NA
Nigeria	NN	NN-E122	2016-01-27	INCUBATOR	Incubator	incubators	Emergency Neonatal Care	N	N	N	NA	NA	NA	NA
Nigeria	NN	NN-E123	2016-01-27	INNER DOOR HANDLE	door handle	handles	Ward Furniture/Surfaces	N	N	N	NA	NA	NA	NA
Nigeria	NN	NN-E124	2016-01-27	RESCUCITAIRE	Resuscitaire	radiant warmers& resuscitation room	Emergency Neonatal Care	N	N	N	NA	NA	NA	NA
Nigeria	NN	NN-E125	2016-01-27	SINK FOR WASHING BABIES	Bathing sink	basin/sink	Sinks and Water System	N	N	N	NA	NA	NA	NA
Nigeria	NN	NN-E126	2016-02-03	WEIGHING SCALE	weighing scale	weighing scale/measuring tape	Patient's Zone	Y	Y	Y	neg	neg	neg	neg
Nigeria	NN	NN-E127	2016-02-03	MATTRESS	Mattress	ward furniture/surfaces	Ward Furniture/Surfaces	N	N	N	NA	NA	NA	NA
Nigeria	NN	NN-E128	2016-02-03	RESCUCITAIRE	Resuscitaire	radiant warmers& resuscitation room	Emergency Neonatal Care	Y	Y	Y	neg	neg	neg	neg
Nigeria	NN	NN-E129	2016-02-03	RESCUCITAIRE	Resuscitaire	radiant warmers& resuscitation room	Emergency Neonatal Care	Y	Y	Y	neg	neg	neg	neg
Nigeria	NN	NN-E13	2015-11-26	INFUSOMAT DIAL	intravenous (IV) line and accessories	medical equipment	Medical Equipment	N	N	N	NA	NA	NA	NA
Nigeria	NN	NN-E130	2016-02-03	SINK	Sink	basin/sink	Sinks and Water System	Y	Y	Y	neg	neg	neg	neg
Nigeria	NN	NN-E131	2016-02-03	INNER DOOR HANDLE	door handle	handles	Ward Furniture/Surfaces	N	N	N	NA	NA	NA	NA
Nigeria	NN	NN-E132	2016-02-03	OUTER DOOR HANDLE	door handle	handles	Ward Furniture/Surfaces	N	N	N	NA	NA	NA	NA
Nigeria	NN	NN-E133	2016-02-03	SINK FOR WASHING BABIES	Bathing sink	basin/sink	Sinks and Water System	N	N	N	NA	NA	NA	NA
Nigeria	NN	NN-E134	2016-02-03	TRAY	tray	mobile medical equipment	Mobile Medical Equipment	Y	Y	Y	neg	neg	neg	neg
Nigeria	NN	NN-E135	2016-02-03	OXYGEN DELIVERY TUBE	Oxygen tube	Oxygen therapy	Mobile Medical Equipment	Y	N	N	NA	NA	NA	NA
Nigeria	NN	NN-E136	2016-02-03	INCUBATOR	Incubator	incubators	Emergency Neonatal Care	N	N	N	NA	NA	NA	NA
Nigeria	NN	NN-E137	2016-02-03	INCUBATOR	Incubator	incubators	Emergency Neonatal Care	N	N	N	NA	NA	NA	NA
Nigeria	NN	NN-E138	2016-02-03	SINK	Sink	basin/sink	Sinks and Water System	Y	Y	Y	P	neg	neg	neg
Nigeria	NN	NN-E139	2016-02-03	SINK TAP HANDLE	handwash sink handle	handles	Sinks and Water System	N	N	N	NA	NA	NA	NA
Nigeria	NN	NN-E14	2015-11-26	HANDWASH SINK	Sink	basin/sink	Sinks and Water System	N	N	N	NA	NA	NA	NA
Nigeria	NN	NN-E140	2016-02-03	SINK TAP HANDLE	handwash sink handle	handles	Sinks and Water System	Y	Y	Y	neg	neg	neg	neg
Nigeria	NN	NN-E141	2016-02-03	SINK	Sink	basin/sink	Sinks and Water System	Y	Y	Y	neg	neg	neg	neg
Nigeria	NN	NN-E142	2016-02-03	INNER DOOR HANDLE	door handle	handles	Ward Furniture/Surfaces	N	N	N	NA	NA	NA	NA
Nigeria	NN	NN-E143	2016-02-03	OUTER DOOR HANDLE	door handle	handles	Ward Furniture/Surfaces	Y	Y	Y	neg	neg	neg	neg
Nigeria	NN	NN-E144	2016-02-03	MATTRESS	Mattress	ward furniture/surfaces	Ward Furniture/Surfaces	Y	Y	Y	neg	neg	neg	neg
Nigeria	NN	NN-E145	2016-02-03	TROLLEY	Trolley	mobile medical equipment	Mobile Medical Equipment	Y	Y	Y	neg	neg	neg	neg
Nigeria	NN	NN-E146	2016-02-11	MOTHERS BED MATTRESS	Mother's mattress	areas/objects around the mother	Patient's Zone	N	N	N	NA	NA	NA	NA
Nigeria	NN	NN-E147	2016-02-11	BABY BED MATTRESS	Baby's mattress	areas/objects around the baby	Patient's Zone	N	N	N	NA	NA	NA	NA
Nigeria	NN	NN-E148	2016-02-11	RESCUCITAIRE	Resuscitaire	radiant warmers& resuscitation room	Emergency Neonatal Care	N	N	N	NA	NA	NA	NA
Nigeria	NN	NN-E149	2016-02-11	RESCUCITAIRE	Resuscitaire	radiant warmers& resuscitation room	Emergency Neonatal Care	N	N	N	NA	NA	NA	NA
Nigeria	NN	NN-E15	2015-11-26	KIDNEY DISH	kidney dish	medical equipment	Medical Equipment	N	N	N	NA	NA	NA	NA
Nigeria	NN	NN-E150	2016-02-11	NURSING STATION	NA			N	N	N	NA	NA	NA	NA
Nigeria	NN	NN-E151	2016-02-11	TROLLEY	Trolley	mobile medical equipment	Mobile Medical Equipment	Y	Y	N	neg	NA	NA	NA
Nigeria	NN	NN-E152	2016-02-11	STERILIZED DELIVERY MATERIAL	Delivery material set	medical equipment	Medical Equipment	Y	Y	Y	neg	neg	neg	neg
Nigeria	NN	NN-E153	2016-02-11	STERILIZED DELIVERY MATERIAL	Delivery material set	medical equipment	Medical Equipment	Y	Y	Y	neg	neg	neg	neg
Nigeria	NN	NN-E154	2016-02-11	DOOR HANDLE	door handle	handles	Ward Furniture/Surfaces	N	N	N	NA	NA	NA	NA
Nigeria	NN	NN-E155	2016-02-11	TAP HANDLE	handwash sink handle	handles	Sinks and Water System	N	N	N	NA	NA	NA	NA
Nigeria	NN	NN-E156	2016-02-11	MEDICATION CABINET	Medication cabinet	medical equipment	Medical Equipment	N	N	N	NA	NA	NA	NA
Nigeria	NN	NN-E157	2016-02-11	MEDICATION CABINET	Medication cabinet	medical equipment	Medical Equipment	Y	N	N	NA	NA	NA	NA
Nigeria	NN	NN-E158	2016-02-11	BATHING SINK	Bathing sink	basin/sink	Sinks and Water System	N	N	N	NA	NA	NA	NA
Nigeria	NN	NN-E159	2016-02-11	LAMP HOLDER	Lamp holder	ward furniture/surfaces	Ward Furniture/Surfaces	N	N	N	NA	NA	NA	NA
Nigeria	NN	NN-E16	2015-11-27	HANDWASH SINK	Sink	basin/sink	Sinks and Water System	N	N	N	NA	NA	NA	NA
Nigeria	NN	NN-E160	2016-02-11	OXYGEN TAP	Oxygen tap	Oxygen therapy	Mobile Medical Equipment	N	N	N	NA	NA	NA	NA
Nigeria	NN	NN-E161	2016-02-17	SAMPLE COLLECTION TABLE	Sample collection table	ward furniture/surfaces	Ward Furniture/Surfaces	Y	Y	N	neg	NA	NA	NA
Nigeria	NN	NN-E162	2016-02-17	SAMPLE COLLECTION TABLE	Sample collection table	ward furniture/surfaces	Ward Furniture/Surfaces	Y	Y	N	neg	NA	NA	NA
Nigeria	NN	NN-E163	2016-02-17	REUSABLE SAMPLE COLLECTION PAD	NA			N	N	N	NA	NA	NA	NA
Nigeria	NN	NN-E164	2016-02-17	SINK	Sink	basin/sink	Sinks and Water System	Y	Y	Y	P	P	neg	neg
Nigeria	NN	NN-E165	2016-02-17	OUTER DOOR HANDLE	door handle	handles	Ward Furniture/Surfaces	Y	N	Y	NA	P	neg	neg
Nigeria	NN	NN-E166	2016-02-17	INNER DOOR HANDLE	door handle	handles	Ward Furniture/Surfaces	Y	Y	Y	neg	neg	neg	neg
Nigeria	NN	NN-E167	2016-02-17	RESCUCITAIRE	Resuscitaire	radiant warmers& resuscitation room	Emergency Neonatal Care	N	N	N	NA	NA	NA	NA
Nigeria	NN	NN-E168	2016-02-17	RESCUCITAIRE	Resuscitaire	radiant warmers& resuscitation room	Emergency Neonatal Care	N	N	N	NA	NA	NA	NA
Nigeria	NN	NN-E169	2016-02-17	SINK	Sink	basin/sink	Sinks and Water System	Y	Y	Y	neg	neg	neg	neg
Nigeria	NN	NN-E17	2015-11-27	TAP HANDLE	handwash sink handle	handles	Sinks and Water System	N	N	N	NA	NA	NA	NA
Nigeria	NN	NN-E170	2016-02-17	OXYGEN DELIVERY TUBE	Oxygen tube	Oxygen therapy	Mobile Medical Equipment	Y	Y	Y	neg	neg	neg	neg
Nigeria	NN	NN-E171	2016-03-03	INCUBATOR	Incubator	incubators	Emergency Neonatal Care	Y	Y	Y	neg	neg	neg	neg
Nigeria	NN	NN-E172	2016-03-03	INCUBATOR	Incubator	incubators	Emergency Neonatal Care	N	N	N	NA	NA	NA	NA
Nigeria	NN	NN-E173	2016-03-03	SINK	Sink	basin/sink	Sinks and Water System	N	N	N	NA	NA	NA	NA
Nigeria	NN	NN-E174	2016-03-03	SINK TAP HANDLE	handwash sink handle	handles	Sinks and Water System	Y	Y	Y	P	P	neg	neg
Nigeria	NN	NN-E175	2016-03-03	DOOR HANDLE	door handle	handles	Ward Furniture/Surfaces	Y	N	N	NA	NA	NA	NA
Nigeria	NN	NN-E176	2016-03-03	DOOR HANDLE	door handle	handles	Ward Furniture/Surfaces	Y	N	N	NA	NA	NA	NA
Nigeria	NN	NN-E177	2016-03-03	HAND SANITIZER HANDLE	hand sanitizer handle	handles	Ward Furniture/Surfaces	N	N	N	NA	NA	NA	NA
Nigeria	NN	NN-E178	2016-03-03	MEDICATION TROLLEY	medication trolley	mobile medical equipment	Mobile Medical Equipment	Y	Y	Y	neg	neg	neg	neg
Nigeria	NN	NN-E179	2016-03-03	WEIGHING SCALE	weighing scale	weighing scale/measuring tape	Patient's Zone	Y	Y	Y	P	P	neg	neg
Nigeria	NN	NN-E18	2015-11-27	TOILET SEAT INNER PART	Toilet seat	ward furniture/surfaces	Ward Furniture/Surfaces	N	N	N	NA	NA	NA	NA
Nigeria	NN	NN-E180	2016-03-03	RESCUCITAIRE	Resuscitaire	radiant warmers& resuscitation room	Emergency Neonatal Care	N	N	N	NA	NA	NA	NA
Nigeria	NN	NN-E181	2016-03-03	RESCUCITAIRE	Resuscitaire	radiant warmers& resuscitation room	Emergency Neonatal Care	N	N	N	NA	NA	NA	NA
Nigeria	NN	NN-E182	2016-03-03	RESCUCITAIRE MATTRESS	Resuscitaire mattress	radiant warmers& resuscitation room	Emergency Neonatal Care	Y	N	N	NA	NA	NA	NA
Nigeria	NN	NN-E183	2016-03-03	DOOR HANDLE	door handle	handles	Ward Furniture/Surfaces	Y	Y	Y	neg	neg	neg	neg
Nigeria	NN	NN-E184	2016-03-03	DOOR HANDLE	door handle	handles	Ward Furniture/Surfaces	N	N	N	NA	NA	NA	NA
Nigeria	NN	NN-E185	2016-03-03	INCUBATOR	Incubator	incubators	Emergency Neonatal Care	Y	N	N	NA	NA	NA	NA
Nigeria	NN	NN-E186	2016-03-31	Mattress	Mattress	ward furniture/surfaces	Ward Furniture/Surfaces	Y	Y	Y	neg	neg	neg	neg
Nigeria	NN	NN-E187	2016-03-31	Resuscitate head	Resuscitaire	radiant warmers& resuscitation room	Emergency Neonatal Care	Y	N	N	NA	NA	NA	NA
Nigeria	NN	NN-E188	2016-03-31	Resuscitate base	Resuscitaire	radiant warmers& resuscitation room	Emergency Neonatal Care	Y	Y	Y	neg	neg	neg	neg
Nigeria	NN	NN-E189	2016-03-31	Door handle outside	door handle	handles	Ward Furniture/Surfaces	N	N	N	NA	NA	NA	NA
Nigeria	NN	NN-E19	2015-11-27	TOILET SEAT UPPER PART	Toilet seat	ward furniture/surfaces	Ward Furniture/Surfaces	N	N	N	NA	NA	NA	NA
Nigeria	NN	NN-E190	2016-03-31	Door handle inside	door handle	handles	Ward Furniture/Surfaces	Y	Y	Y	neg	neg	neg	neg
Nigeria	NN	NN-E191	2016-03-31	Stainless trolley	Trolley	mobile medical equipment	Mobile Medical Equipment	Y	Y	Y	neg	neg	neg	neg
Nigeria	NN	NN-E192	2016-03-31	Kidney dish outside	kidney dish	medical equipment	Medical Equipment	N	N	N	NA	NA	NA	NA
Nigeria	NN	NN-E193	2016-03-31	Kidney dish inside	kidney dish	medical equipment	Medical Equipment	N	N	N	NA	NA	NA	NA
Nigeria	NN	NN-E194	2016-03-31	Tap handle	handwash sink handle	handles	Sinks and Water System	Y	Y	Y	neg	neg	neg	neg
Nigeria	NN	NN-E195	2016-03-31	Toilet door handle	toilet door handle	handles	Ward Furniture/Surfaces	N	N	N	NA	NA	NA	NA
Nigeria	NN	NN-E196	2016-04-21	Resuscitate	Resuscitaire	radiant warmers& resuscitation room	Emergency Neonatal Care	Y	Y	Y	neg	neg	neg	neg
Nigeria	NN	NN-E197	2016-04-21	Door handle inside	door handle	handles	Ward Furniture/Surfaces	Y	Y	Y	neg	neg	neg	neg
Nigeria	NN	NN-E198	2016-04-21	Bleeding bay	NA			Y	N	Y	NA	neg	neg	neg
Nigeria	NN	NN-E199	2016-04-21	Door handle outside	door handle	handles	Ward Furniture/Surfaces	N	N	N	NA	NA	NA	NA
Nigeria	NN	NN-E2	2015-11-26	BATHING SINK	Bathing sink	basin/sink	Sinks and Water System	N	N	N	NA	NA	NA	NA
Nigeria	NN	NN-E20	2015-11-27	BATHING SINK INNER PART	Bathing sink	basin/sink	Sinks and Water System	N	N	N	NA	NA	NA	NA
Nigeria	NN	NN-E200	2016-04-21	Tap handle	handwash sink handle	handles	Sinks and Water System	N	N	N	NA	NA	NA	NA
Nigeria	NN	NN-E201	2016-04-21	Door handle inside	door handle	handles	Ward Furniture/Surfaces	N	N	N	NA	NA	NA	NA
Nigeria	NN	NN-E202	2016-04-21	Door handle outside	door handle	handles	Ward Furniture/Surfaces	N	N	N	NA	NA	NA	NA
Nigeria	NN	NN-E203	2016-04-21	Incubator	Incubator	incubators	Emergency Neonatal Care	N	N	N	NA	NA	NA	NA
Nigeria	NN	NN-E204	2016-04-21	Tap handle	handwash sink handle	handles	Sinks and Water System	N	N	N	NA	NA	NA	NA
Nigeria	NN	NN-E205	2016-04-21	Sink.	Sink	basin/sink	Sinks and Water System	Y	Y	N	neg	NA	NA	NA
Nigeria	NN	NN-E206	2016-04-21	Door handle inside	door handle	handles	Ward Furniture/Surfaces	N	N	N	NA	NA	NA	NA
Nigeria	NN	NN-E207	2016-04-21	Door handle outside	door handle	handles	Ward Furniture/Surfaces	N	N	N	NA	NA	NA	NA
Nigeria	NN	NN-E208	2016-04-21	Incubator	Incubator	incubators	Emergency Neonatal Care	N	N	N	NA	NA	NA	NA
Nigeria	NN	NN-E209	2016-04-21	Tap handle	handwash sink handle	handles	Sinks and Water System	Y	Y	Y	neg	neg	neg	neg
Nigeria	NN	NN-E21	2015-11-27	BATHING SINK UPPER PART	Bathing sink	basin/sink	Sinks and Water System	Y	Y	Y	neg	neg	neg	neg
Nigeria	NN	NN-E210	2016-04-21	Sink	Sink	basin/sink	Sinks and Water System	N	N	N	NA	NA	NA	NA
Nigeria	NN	NN-E211	2016-04-26	DOOR HANDLE - INSIDE	door handle	handles	Ward Furniture/Surfaces	N	N	N	NA	NA	NA	NA
Nigeria	NN	NN-E212	2016-04-26	DOOR HANDLE-OUTSIDE	door handle	handles	Ward Furniture/Surfaces	Y	Y	N	neg	NA	NA	NA
Nigeria	NN	NN-E213	2016-04-26	SINK	Sink	basin/sink	Sinks and Water System	Y	Y	N	neg	NA	NA	NA
Nigeria	NN	NN-E214	2016-04-26	TAP HAND	handwash sink handle	handles	Sinks and Water System	Y	Y	N	neg	NA	NA	NA
Nigeria	NN	NN-E215	2016-04-26	RESUSCITAIRE	Resuscitaire	radiant warmers& resuscitation room	Emergency Neonatal Care	N	N	N	NA	NA	NA	NA
Nigeria	NN	NN-E216	2016-04-26	MATTRESS (BABY)	Baby's mattress	areas/objects around the baby	Patient's Zone	Y	Y	N	neg	NA	NA	NA
Nigeria	NN	NN-E217	2016-04-26	KIDNEY DISH	kidney dish	medical equipment	Medical Equipment	N	N	N	NA	NA	NA	NA
Nigeria	NN	NN-E218	2016-04-26	CABINET	Cabinet	ward furniture/surfaces	Ward Furniture/Surfaces	Y	Y	N	neg	NA	NA	NA
Nigeria	NN	NN-E219	2016-04-26	NURSING STATION	NA			N	N	N	NA	NA	NA	NA
Nigeria	NN	NN-E22	2015-11-27	WALL TILES TOILET	Toilet's wall	ward furniture/surfaces	Ward Furniture/Surfaces	Y	Y	Y	neg	neg	neg	neg
Nigeria	NN	NN-E220	2016-04-26	MATTRESS (MOTHER)	Mother's mattress	areas/objects around the mother	Patient's Zone	Y	Y	N	neg	NA	NA	NA
Nigeria	NN	NN-E221	13/05/2016	DOOR HANDLE - INSIDE	door handle	handles	Ward Furniture/Surfaces	N	N	N	NA	NA	NA	NA
Nigeria	NN	NN-E222	13/05/2016	DOOR HANDLE - OUTSIDE	door handle	handles	Ward Furniture/Surfaces	Y	Y	Y	neg	neg	neg	neg
Nigeria	NN	NN-E223	13/05/2016	BLEEDING BAY	NA			N	N	N	NA	NA	NA	NA
Nigeria	NN	NN-E224	13/05/2016	RESUSCITAIRE (INSIDE)	Resuscitaire	radiant warmers& resuscitation room	Emergency Neonatal Care	Y	Y	Y	neg	neg	neg	neg
Nigeria	NN	NN-E225	13/05/2016	PHOTOTHERAPY	Phototherapy machine	phototherapy	Medical Equipment	N	N	N	NA	NA	NA	NA
Nigeria	NN	NN-E226	13/05/2016	RESUSCITARE (OUTSIDE)	Resuscitaire	radiant warmers& resuscitation room	Emergency Neonatal Care	Y	Y	Y	neg	neg	neg	neg
Nigeria	NN	NN-E227	13/05/2016	BABY MATTRESS	Baby's mattress	areas/objects around the baby	Patient's Zone	N	N	N	NA	NA	NA	NA
Nigeria	NN	NN-E228	13/05/2016	MOBILE TROLLEY	Trolley	mobile medical equipment	Mobile Medical Equipment	Y	Y	Y	neg	neg	neg	neg
Nigeria	NN	NN-E229	13/05/2016	BATHING SINK	Bathing sink	basin/sink	Sinks and Water System	Y	Y	Y	neg	neg	neg	neg
Nigeria	NN	NN-E23	2015-11-27	WALL MIRROR TOILET	Toilet's wall	ward furniture/surfaces	Ward Furniture/Surfaces	N	N	N	NA	NA	NA	NA
Nigeria	NN	NN-E230	13/05/2016	OXYGEN INLET	Oxygen inlet	Oxygen therapy	Mobile Medical Equipment	N	N	N	NA	NA	NA	NA
Nigeria	NN	NN-E231	13/05/2016	INCUBATOR (IN)	Incubator	incubators	Emergency Neonatal Care	N	N	N	NA	NA	NA	NA
Nigeria	NN	NN-E232	13/05/2016	INCUBATOR (OUT)	Incubator	incubators	Emergency Neonatal Care	N	N	N	NA	NA	NA	NA
Nigeria	NN	NN-E233	13/05/2016	DOOR HANDLE INSIDE	door handle	handles	Ward Furniture/Surfaces	Y	Y	N	neg	NA	NA	NA
Nigeria	NN	NN-E234	13/05/2016	DOOR HANDLE OUTSIDE	door handle	handles	Ward Furniture/Surfaces	N	N	N	NA	NA	NA	NA
Nigeria	NN	NN-E235	13/05/2016	BATHING SINK	Bathing sink	basin/sink	Sinks and Water System	Y	Y	Y	P	P	neg	neg
Nigeria	NN	NN-E236	13/05/2016	DOOR HANDLE INSIDE	door handle	handles	Ward Furniture/Surfaces	Y	Y	Y	neg	neg	neg	neg
Nigeria	NN	NN-E237	13/05/2016	DOOR HANDLE OUTSIDE	door handle	handles	Ward Furniture/Surfaces	N	N	N	NA	NA	NA	NA
Nigeria	NN	NN-E238	13/05/2016	TAP HANDLE	handwash sink handle	handles	Sinks and Water System	N	N	N	NA	NA	NA	NA
Nigeria	NN	NN-E239	13/05/2016	RESUSCITAIRE	Resuscitaire	radiant warmers& resuscitation room	Emergency Neonatal Care	Y	Y	Y	P	neg	neg	neg
Nigeria	NN	NN-E24	2015-11-27	HANDWASH SINK	Sink	basin/sink	Sinks and Water System	N	N	N	NA	NA	NA	NA
Nigeria	NN	NN-E240	13/05/2016	TROLLEY	Trolley	mobile medical equipment	Mobile Medical Equipment	Y	Y	Y	P	neg	neg	neg
Nigeria	NN	NN-E241	13/05/2016	SINK	Sink	basin/sink	Sinks and Water System	Y	Y	Y	P	P	neg	P
Nigeria	NN	NN-E242	13/05/2016	DOOR HANDLE INSIDE	door handle	handles	Ward Furniture/Surfaces	Y	Y	Y	neg	neg	neg	neg
Nigeria	NN	NN-E243	13/05/2016	DOOR HANDLE OUTSIDE	door handle	handles	Ward Furniture/Surfaces	N	N	N	NA	NA	NA	NA
Nigeria	NN	NN-E244	13/05/2016	TAP HANDLE	handwash sink handle	handles	Sinks and Water System	Y	Y	Y	neg	neg	neg	neg
Nigeria	NN	NN-E245	13/05/2016	REST ROOM DOOR HANDLE	rest room door handle	handles	Ward Furniture/Surfaces	Y	Y	Y	neg	neg	neg	neg
Nigeria	NN	NN-E246	2016-06-06	MOTHER'S BED	Mother's bed	areas/objects around the mother	Patient's Zone	Y	Y	Y	neg	neg	neg	neg
Nigeria	NN	NN-E247	2016-06-06	RESUSCITATING BED	Resuscitaire bed	radiant warmers& resuscitation room	Emergency Neonatal Care	N	N	N	NA	NA	NA	NA
Nigeria	NN	NN-E248	2016-06-06	WEIGHING SCALE	weighing scale	weighing scale/measuring tape	Patient's Zone	Y	Y	Y	neg	neg	neg	neg
Nigeria	NN	NN-E249	2016-06-06	CTG MACHINE	Cardiotocography monitor	monitors	Mobile Medical Equipment	Y	Y	Y	P	neg	neg	neg
Nigeria	NN	NN-E25	2015-11-27	HANDWASH SINK	Sink	basin/sink	Sinks and Water System	N	N	N	NA	NA	NA	NA
Nigeria	NN	NN-E250	2016-06-06	DRUG BOX	Drug box	ward furniture/surfaces	Ward Furniture/Surfaces	Y	Y	Y	neg	neg	neg	neg
Nigeria	NN	NN-E251	2016-06-06	SUCTIONING MACHINE	medical suction machine	mobile medical equipment	Mobile Medical Equipment	Y	N	Y	NA	neg	neg	neg
Nigeria	NN	NN-E252	2016-06-06	INFANT RADIANT WARMER	Infant radiant warmer	radiant warmers& resuscitation room	Emergency Neonatal Care	Y	N	N	NA	NA	NA	NA
Nigeria	NN	NN-E253	2016-06-06	STERILE OBSTERICS FORCEPS & SPECULUM	STERILE OBSTERICS FORCEPS & SPECULUM	medical equipment	Medical Equipment	Y	Y	Y	neg	neg	neg	neg
Nigeria	NN	NN-E254	2016-06-06	BED STEP	Bed step	ward furniture/surfaces	Patient's Zone	Y	Y	Y	neg	neg	neg	neg
Nigeria	NN	NN-E255	2016-06-06	CURTAIN	Curtain	ward furniture/surfaces	Ward Furniture/Surfaces	N	N	N	NA	NA	NA	NA
Nigeria	NN	NN-E256	2016-06-06	MEASURING TAPE	Measuring tape	weighing scale/measuring tape	Patient's Zone	N	N	N	NA	NA	NA	NA
Nigeria	NN	NN-E257	2016-06-06	STETHOSCOPE SPHYG	stethoscope and sphygmomanometer	medical equipment	Medical Equipment	Y	Y	Y	neg	neg	neg	neg
Nigeria	NN	NN-E258	2016-06-06	OXYGEN CONNECTOR & TUBE	Oxygen connector	Oxygen therapy	Mobile Medical Equipment	N	N	N	NA	NA	NA	NA
Nigeria	NN	NN-E259	2016-06-06	TROLLEY BESIDE DELIVERY BED	delivery trolley	mobile medical equipment	Mobile Medical Equipment	Y	N	Y	NA	P	neg	neg
Nigeria	NN	NN-E26	2015-11-27	KIDNEY DISH	kidney dish	medical equipment	Medical Equipment	N	N	N	NA	NA	NA	NA
Nigeria	NN	NN-E260	2016-06-06	OBSTERIC EQUIPMENT TABLE	Obstetric equipment table	ward furniture/surfaces	Ward Furniture/Surfaces	Y	N	N	NA	NA	NA	NA
Nigeria	NN	NN-E261	2016-06-24	RADIANT WARMER	Radiant warmer	radiant warmers& resuscitation room	Emergency Neonatal Care	Y	N	Y	NA	neg	neg	neg
Nigeria	NN	NN-E262	2016-06-24	INCUBATOR	Incubator	incubators	Emergency Neonatal Care	Y	Y	Y	neg	neg	neg	neg
Nigeria	NN	NN-E263	2016-06-24	SINK	Sink	basin/sink	Sinks and Water System	Y	Y	Y	neg	neg	neg	neg
Nigeria	NN	NN-E264	2016-06-24	OXYGEN MACHINE	Oxygen machine	Oxygen therapy	Mobile Medical Equipment	Y	Y	Y	neg	neg	neg	neg
Nigeria	NN	NN-E265	2016-06-24	OVERALL (MOTHERS)	Mother's overall	areas/objects around the mother	Patient's Zone	Y	Y	Y	P	P	neg	neg
Nigeria	NN	NN-E266	2016-06-24	TABLE	Table	ward furniture/surfaces	Ward Furniture/Surfaces	Y	Y	Y	neg	neg	neg	neg
Nigeria	NN	NN-E267	2016-06-24	STETHOSCOPE	stethoscope and sphygmomanometer	medical equipment	Medical Equipment	Y	Y	Y	neg	neg	neg	neg
Nigeria	NN	NN-E268	2016-06-24	PHOTOTHERAPY	Phototherapy machine	phototherapy	Medical Equipment	N	N	N	NA	NA	NA	NA
Nigeria	NN	NN-E269	2016-06-24	MILK ROOM	NA			Y	Y	Y	P	P	neg	neg
Nigeria	NN	NN-E27	2015-11-27	KIDNEY DISH	kidney dish	medical equipment	Medical Equipment	N	N	N	NA	NA	NA	NA
Nigeria	NN	NN-E270	2016-06-24	WEIGHING MACHINE	weighing scale	weighing scale/measuring tape	Patient's Zone	Y	Y	N	neg	NA	NA	NA
Nigeria	NN	NN-E271	2016-07-11	GASTRIC TUBE	cannula&catheter&prong&tubes	medical equipment	Medical Equipment	N	N	N	NA	NA	NA	NA
Nigeria	NN	NN-E272	2016-07-11	RADIANT WARMER	Radiant warmer	radiant warmers& resuscitation room	Emergency Neonatal Care	N	N	N	NA	NA	NA	NA
Nigeria	NN	NN-E273	2016-07-11	OXYGEN TUBE	Oxygen tube	Oxygen therapy	Mobile Medical Equipment	N	N	N	NA	NA	NA	NA
Nigeria	NN	NN-E274	2016-07-11	BABY'S BED	Baby's bed	areas/objects around the baby	Patient's Zone	N	N	N	NA	NA	NA	NA
Nigeria	NN	NN-E275	2016-07-11	PHOTOTHERAPY	Phototherapy machine	phototherapy	Medical Equipment	N	N	N	NA	NA	NA	NA
Nigeria	NN	NN-E276	2016-07-11	INNER SIDE OF COT	Cot	ward furniture/surfaces	Patient's Zone	N	N	N	NA	NA	NA	NA
Nigeria	NN	NN-E277	2016-07-11	MEASURING TAPE	Measuring tape	weighing scale/measuring tape	Patient's Zone	N	N	N	NA	NA	NA	NA
Nigeria	NN	NN-E278	2016-07-11	STHESTOSCOPE AND SPHIG	stethoscope and sphygmomanometer	medical equipment	Medical Equipment	Y	Y	Y	neg	neg	neg	neg
Nigeria	NN	NN-E279	2016-07-11	BABY'S INCUBATOR	Baby incubator	incubators	Emergency Neonatal Care	N	N	N	NA	NA	NA	NA
Nigeria	NN	NN-E28	2015-11-27	SCISSORS-DELIVERY	NA			N	N	N	NA	NA	NA	NA
Nigeria	NN	NN-E280	2016-07-11	MOTHETR'S OVERALL	Mother's overall	areas/objects around the mother	Patient's Zone	N	N	N	NA	NA	NA	NA
Nigeria	NN	NN-E281	2016-07-28	MILKING MILK	NA			N	N	N	NA	NA	NA	NA
Nigeria	NN	NN-E282	2016-07-28	BABY'S BED	Baby's bed	areas/objects around the baby	Patient's Zone	Y	Y	Y	neg	neg	neg	neg
Nigeria	NN	NN-E283	2016-07-28	INCUBATOR	Incubator	incubators	Emergency Neonatal Care	Y	N	Y	NA	neg	neg	neg
Nigeria	NN	NN-E284	2016-07-28	OXYGEN TUBE	Oxygen tube	Oxygen therapy	Mobile Medical Equipment	N	N	N	NA	NA	NA	NA
Nigeria	NN	NN-E285	2016-07-28	BABY'S MATTRESS	Baby's mattress	areas/objects around the baby	Patient's Zone	N	N	N	NA	NA	NA	NA
Nigeria	NN	NN-E286	2016-07-28	MOTHER'S BED	Mother's bed	areas/objects around the mother	Patient's Zone	N	N	N	NA	NA	NA	NA
Nigeria	NN	NN-E287	2016-07-28	TROLLEY	Trolley	mobile medical equipment	Mobile Medical Equipment	N	N	N	NA	NA	NA	NA
Nigeria	NN	NN-E288	2016-07-28	STHESTOSCOPE AND SPHIG	stethoscope and sphygmomanometer	medical equipment	Medical Equipment	N	N	N	NA	NA	NA	NA
Nigeria	NN	NN-E289	2016-07-28	DRUG BOX	Drug box	ward furniture/surfaces	Ward Furniture/Surfaces	N	N	N	NA	NA	NA	NA
Nigeria	NN	NN-E29	2015-11-27	NURSING STATION DESK	Nurses' station desk	healthcare workers&workstation	Patient's Zone	Y	N	Y	NA	neg	neg	neg
Nigeria	NN	NN-E290	2016-07-28	BABY WEIGHING PAN	Baby weighing scale	weighing scale/measuring tape	Patient's Zone	Y	Y	Y	neg	neg	neg	neg
Nigeria	NN	NN-E291	2016-07-28	RADIANT WARMER	Radiant warmer	radiant warmers& resuscitation room	Emergency Neonatal Care	N	N	N	NA	NA	NA	NA
Nigeria	NN	NN-E292	2016-07-28	BED STEP	Bed step	ward furniture/surfaces	Patient's Zone	N	N	N	NA	NA	NA	NA
Nigeria	NN	NN-E293	2016-07-28	CTG MACHINE	Cardiotocography monitor	monitors	Mobile Medical Equipment	N	N	N	NA	NA	NA	NA
Nigeria	NN	NN-E294	2016-07-28	OBSTETRICS FORCEPS	STERILE OBSTERICS FORCEPS & SPECULUM	medical equipment	Medical Equipment	N	N	N	NA	NA	NA	NA
Nigeria	NN	NN-E295	2016-07-28	OXYGEN MACHINE	Oxygen machine	Oxygen therapy	Mobile Medical Equipment	N	N	N	NA	NA	NA	NA
Nigeria	NN	NN-E296	2016-08-06	PHOTOTHERAPY	Phototherapy machine	phototherapy	Medical Equipment	N	N	N	NA	NA	NA	NA
Nigeria	NN	NN-E297	2016-08-06	BATHING SINK	Bathing sink	basin/sink	Sinks and Water System	N	N	N	NA	NA	NA	NA
Nigeria	NN	NN-E298	2016-08-06	MOBILE TROLLEY	Trolley	mobile medical equipment	Mobile Medical Equipment	N	N	N	NA	NA	NA	NA
Nigeria	NN	NN-E299	2016-08-06	WEIGHING SCALE	weighing scale	weighing scale/measuring tape	Patient's Zone	N	N	N	NA	NA	NA	NA
Nigeria	NN	NN-E3	2015-11-26	HANDWASH SINK HANDLE	handwash sink handle	handles	Sinks and Water System	N	N	N	NA	NA	NA	NA
Nigeria	NN	NN-E30	2015-11-27	LAMP STAND	Lamp stand	ward furniture/surfaces	Ward Furniture/Surfaces	N	N	N	NA	NA	NA	NA
Nigeria	NN	NN-E300	2016-08-06	INSIDE INCUBATOR	Incubator	incubators	Emergency Neonatal Care	N	N	N	NA	NA	NA	NA
Nigeria	NN	NN-E301	2016-08-06	STHESTOSCOPE AND SPHIG	stethoscope and sphygmomanometer	medical equipment	Medical Equipment	N	N	N	NA	NA	NA	NA
Nigeria	NN	NN-E302	2016-08-06	RADIANT WARMER	Radiant warmer	radiant warmers& resuscitation room	Emergency Neonatal Care	N	N	N	NA	NA	NA	NA
Nigeria	NN	NN-E303	2016-08-06	OXYGEN INLET	Oxygen inlet	Oxygen therapy	Mobile Medical Equipment	N	N	N	NA	NA	NA	NA
Nigeria	NN	NN-E304	2016-08-06	OXYGEN MACHINE	Oxygen machine	Oxygen therapy	Mobile Medical Equipment	Y	Y	Y	neg	neg	neg	neg
Nigeria	NN	NN-E305	2016-08-06	MILKING MILK	NA			N	N	N	NA	NA	NA	NA
Nigeria	NN	NN-E306	2016-08-19	BLEEDING BAY	NA			N	N	N	NA	NA	NA	NA
Nigeria	NN	NN-E307	2016-08-19	BABY MATTRESS	Baby's mattress	areas/objects around the baby	Patient's Zone	N	N	N	NA	NA	NA	NA
Nigeria	NN	NN-E308	2016-08-19	INSIDE RESUSCITAIRE	Resuscitaire	radiant warmers& resuscitation room	Emergency Neonatal Care	N	N	N	NA	NA	NA	NA
Nigeria	NN	NN-E309	2016-08-19	SINK	Sink	basin/sink	Sinks and Water System	N	N	N	NA	NA	NA	NA
Nigeria	NN	NN-E31	2015-11-27	MATTRESS	Mattress	ward furniture/surfaces	Ward Furniture/Surfaces	N	N	N	NA	NA	NA	NA
Nigeria	NN	NN-E310	2016-08-19	CTG MACHINE	Cardiotocography monitor	monitors	Mobile Medical Equipment	N	N	N	NA	NA	NA	NA
Nigeria	NN	NN-E311	2016-08-19	KIDNEY DISH	kidney dish	medical equipment	Medical Equipment	Y	Y	N	neg	NA	NA	NA
Nigeria	NN	NN-E312	2016-08-19	DRUG BOX	Drug box	ward furniture/surfaces	Ward Furniture/Surfaces	N	N	N	NA	NA	NA	NA
Nigeria	NN	NN-E313	2016-08-19	NURSING STATION	NA			N	N	N	NA	NA	NA	NA
Nigeria	NN	NN-E314	2016-08-19	DELIVERY BED	Delivery bed	ward furniture/surfaces	Patient's Zone	N	N	N	NA	NA	NA	NA
Nigeria	NN	NN-E315	2016-08-19	MEASURING TAPE	Measuring tape	weighing scale/measuring tape	Patient's Zone	N	N	N	NA	NA	NA	NA
Nigeria	NN	NN-E316	2016-08-19	MOTHER'S OVERALL	Mother's overall	areas/objects around the mother	Patient's Zone	N	N	N	NA	NA	NA	NA
Nigeria	NN	NN-E317	2016-08-19	BABY'S RESUSCITAIRE	Baby resuscitaire	radiant warmers& resuscitation room	Emergency Neonatal Care	Y	Y	Y	neg	neg	neg	neg
Nigeria	NN	NN-E318	2016-08-19	WEIGHING SCALE	weighing scale	weighing scale/measuring tape	Patient's Zone	N	N	N	NA	NA	NA	NA
Nigeria	NN	NN-E319	2016-08-19	MOBILE TROLLEY	Trolley	mobile medical equipment	Mobile Medical Equipment	Y	Y	Y	neg	neg	neg	neg
Nigeria	NN	NN-E32	2015-11-27	WINDOW	Window	ward furniture/surfaces	Ward Furniture/Surfaces	Y	Y	Y	neg	neg	neg	neg
Nigeria	NN	NN-E320	2016-08-19	OBSTETRICS AND FORCEPS	STERILE OBSTERICS FORCEPS & SPECULUM	medical equipment	Medical Equipment	Y	Y	Y	neg	neg	neg	neg
Nigeria	NN	NN-E321	2016-09-16	OXYGEN VALVE	Oxygen valve	Oxygen therapy	Mobile Medical Equipment	N	N	N	NA	NA	NA	NA
[truncated: 4,293 more rows]
